# Supplementary material for: Hypoxia-activated prodrugs of phenolic olaparib analogues for tumour-selective chemosensitisation
Source: Royal Society of Chemistry journal article supplement (doi:10.1039/d3md00117b), 2023-01-01
Supplement: d3md00117b1.pdf [file d3md00117b1.pdf]

## Hypoxia-activated prodrugs of phenolic olaparib analogues for tumour-selective chemosensitisation.

Way Wua Wong, Sophia O'Brien-Gortner, Robert F. Anderson, William R. Wilson, Michael P. Hay and Benjamin D. Dickson

|                                                                                         |        |
|-----------------------------------------------------------------------------------------|--------|
| Key Structures                                                                          | pp. 1  |
| General Information                                                                     | pp. 2  |
| Assignment of alkene stereochemistry                                                    | pp. 2  |
| Synthesis of Compounds                                                                  | pp. 5  |
| References                                                                              | pp. 27 |
| NMR spectra for compounds <b>4 – 11</b> , <b>18</b> , <b>38 – 40</b> and <b>44 – 46</b> | pp. 28 |
| HPLC traces for compounds <b>4 – 11</b> , <b>18</b> , <b>38 – 40</b> and <b>44 – 46</b> | pp. 58 |

### Key Structures

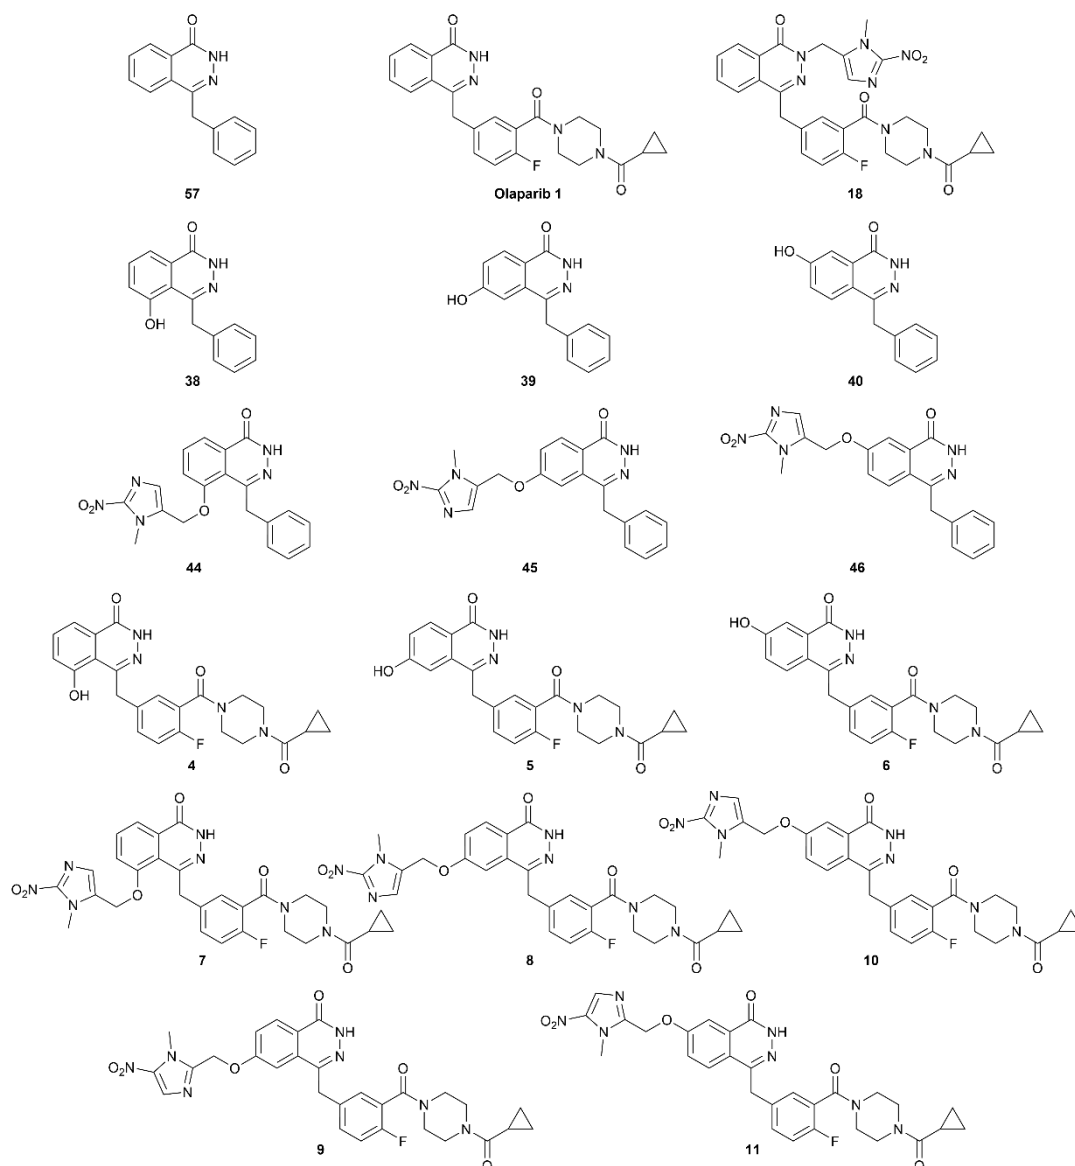

Figure S1: Structures of key compounds included in biochemical and cellular analyses.

## General Information

DCM, DMF, MeCN and THF were purchased pre-dried and stored over molecular sieves from Acros Organics. All other reaction solvents were analytical grade. For lithiation reactions analytical grade THF was pre-dried over sodium, then distilled from sodium benzophenone ketyl prior to use. Non-aqueous reactions were carried out under a nitrogen atmosphere unless otherwise noted. Commercial reagents were used without purification. Flash column chromatography was carried out on a silica gel solid phase (Merck 230 – 400 mesh) using distilled laboratory grade solvents. Thin layer chromatography was carried out using Merck 60 F<sub>254</sub> aluminium plates pre-coated with silica. Compounds were identified using UV fluorescence and/or staining with either ninhydrin in ethanol/glacial acetic acid (95:5) (with heating), or iodine on silica gel. Melting points were determined on an Electrothermal 2300 Melting Point Apparatus. High resolution mass spectra (HRMS) were measured on an Agilent Technologies 6530 Accurate-Mass Quadrupole Time of Flight (Q-TOF) LC/MS interfaced with an Agilent Jet Stream Electrospray Ionisation (ESI) source allowing positive or negative ions detection. Low-resolution mass spectra (LRMS) were gathered by direct injection of methanolic solutions into an Agilent 6120 mass spectrometer using atmospheric pressure chemical ionization (APCI) mode with a fragmentor voltage of 50 V and a drying gas temperature of 250 °C. NMR spectra were recorded on a Bruker Avance 400 spectrometer (<sup>1</sup>H nuclei, 400 MHz; <sup>13</sup>C nuclei, 100MHz) in (CD<sub>3</sub>)<sub>2</sub>SO unless specified. All chemical shift (δ) values are reported in parts per million (ppm) relative to the residual <sup>1</sup>H resonance from the deuterated solvent, coupling constants are reported in Hertz (Hz). <sup>13</sup>C spectral assignments were made *via* interpretation of HSQC, HMBC and APT experiments. Final products were analysed by reverse-phase HPLC (Agilent Zorbax Eclipse XDB C8 5 μm column, 150 mm × 4.6 mm; or Alltech Altima C8 5 μm column, 150 mm × 2.1;) using an Agilent HP1100 equipped with a photodiode array detector. Mobile phases were gradients of 80% CH<sub>3</sub>CN/20% H<sub>2</sub>O (v/v) in 45 mM ammonium formate at pH 3.5 and 0.5 – 1.0 mL/min. Purity was determined by monitoring at 330 ± 50 nm. AcOH refers to acetic acid, DCM refers to dichloromethane, DIPEA refers to diisopropylethylamine, DMF refers to dimethylformamide, Et<sub>2</sub>O refers to diethylether, EtOAc refers to ethyl acetate, EtOH refers to ethanol, LiHMDS refers to lithium hexamethyldisilazide, MeOH refers to methanol, MeCN refers to acetonitrile, NEt<sub>3</sub> refers to triethylamine, PhMe refers to toluene, THF refers to tetrahydrofuran, X4 refers to petroleum ether, boiling fraction 40 – 60 °C.

## Assignment of alkene stereochemistry

For alkenes where both isomers were isolated it was possible to organise the products into two distinct groups based on the <sup>1</sup>H and <sup>13</sup>C signals of the olefinic CH (Table S1). The groupings could be defined as Group A: δ<sub>H</sub> 6.86 – 7.06 ppm; δ<sub>C</sub> 108.0 – 113.3 ppm and Group B: δ<sub>H</sub> 6.39 – 7.00 ppm; δ<sub>C</sub> 102.4 – 109.2 ppm. The <sup>13</sup>C signal is more diagnostic as there is significant overlap in the <sup>1</sup>H signal range, however in cases where the <sup>13</sup>C signal leaves ambiguity the <sup>1</sup>H signal can in some cases resolve this. Miura *et al.*<sup>1</sup> reported the *Z*-isomer of alkene **34**, with assignment provided by analysis of NOE enhancements and based on this we tentatively assigned Group A as the *E*-isomer and Group B as the *Z*-isomer. A NOESY experiment for alkene **50** (Figure S1, Figure S2) supported this assignment and all other alkene stereochemistry has been assigned on this basis. In all except one instance (benzofuranone **55**) when only a single isomer was isolated it was the *E*-isomer.

Table S1: Alkene isomer <sup>1</sup>H and <sup>13</sup>C shifts ((CD<sub>3</sub>)<sub>2</sub>SO unless specified) for olefinic CH

| Compound | Group A ( <i>E</i> )        |                              | Group B ( <i>Z</i> )        |                              |
|----------|-----------------------------|------------------------------|-----------------------------|------------------------------|
|          | Alkene <sup>1</sup> H (ppm) | Alkene <sup>13</sup> C (ppm) | Alkene <sup>1</sup> H (ppm) | Alkene <sup>13</sup> C (ppm) |
| 33       | 6.99                        | 112.4                        | 6.85                        | 109.2                        |
| 34       | 6.90 <sup>1</sup>           | 112.8 <sup>1</sup>           | 6.39 <sup>1</sup>           | 107.0 <sup>1</sup>           |
| 35       | 6.92                        | 110.8                        | 6.80                        | 105.3                        |
| 36       | 6.95                        | 112.4                        | 6.81                        | 106.2                        |
| 37       | n.i.                        | n.i.                         | 6.70 <sup>1</sup>           | 104.3 <sup>1</sup>           |
| 41       | n.i.                        | n.i.                         | 6.79                        | 110.4                        |
| 42       | 7.06                        | 113.3                        | 6.96                        | 106.9                        |
| 43       | n.i.                        | n.i.                         | 6.84                        | 105.7                        |
| 47       | 6.98                        | 110.5                        | 6.87                        | 107.2                        |
| 48       | 7.01                        | 111.2                        | 7.00                        | 104.8                        |
| 49       | 6.89                        | 109.0                        | 6.84                        | 103.3                        |
| 50       | 6.93                        | 110.5                        | 6.85                        | 104.3                        |
| 51       | 6.86                        | 108.0                        | 6.76                        | 102.4                        |
| 52       | 6.90                        | 112.0                        | 6.81                        | 108.9                        |
| 53       | n.i.                        | n.i.                         | 6.99                        | 105.0                        |
| 54       | n.i.                        | n.i.                         | 6.88                        | 103.7                        |
| 55       | 7.02                        | 112.0                        | n.i.                        | n.i.                         |
| 56       | 6.93                        | 109.5                        | 6.88                        | 103.7                        |

n.i.: Not isolated. <sup>1</sup>From CDCl<sub>3</sub> spectrum.

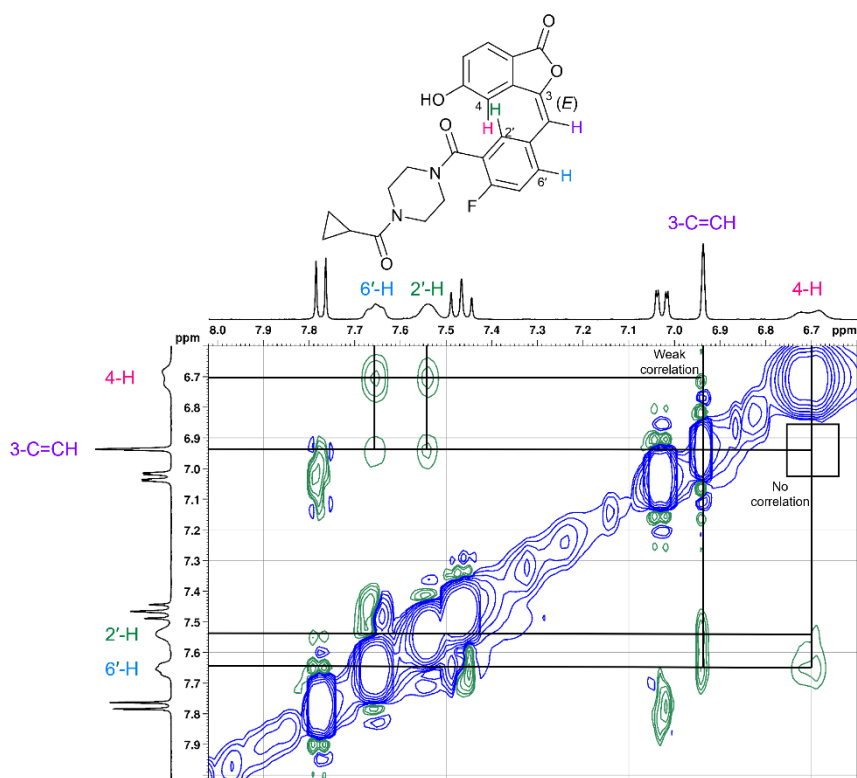

Figure S2: (*E*)-**50** NOESY experiment key correlations. Through space correlations between 6'-H and 3-C=CH, and 2'-H and 3-C=CH support assignment as *E*. Weak correlation between 4-H and 3-C=CH is only present on one axis and is likely an artifact, providing further support to assignment as *E*.

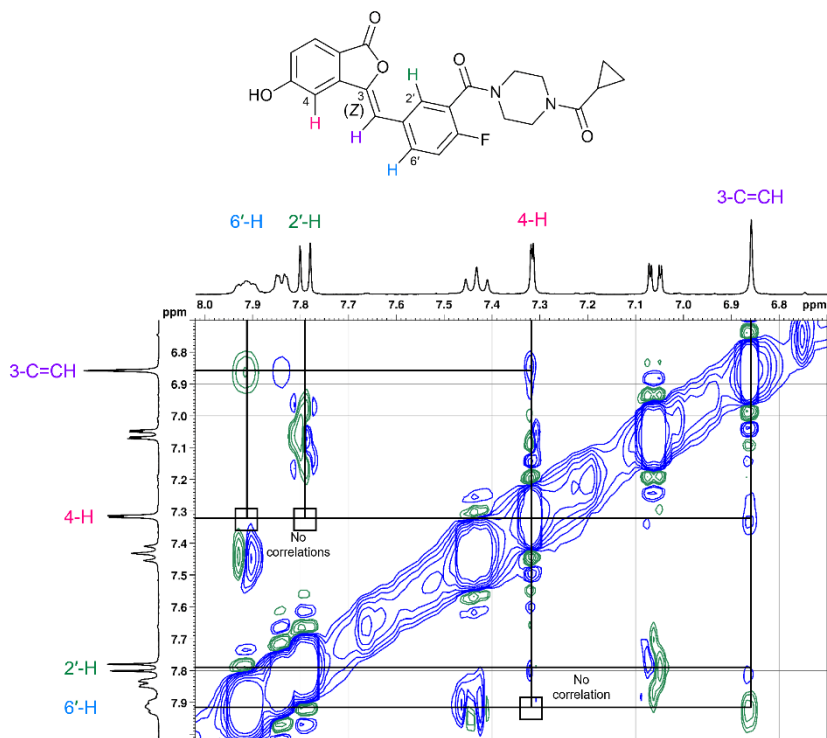

Figure S3: (*Z*)-**50** NOESY experiment key correlation. Correlation between 4-H and 3-C=CH is present on both axes supporting assignment as *Z*. Single weak correlation between 2'-CH and 4-H on one axis is likely an artifact, and there are no correlations between 4-H and 6'-CH providing further support to assignment as *Z*.

## Synthesis of Compounds

### General Procedure B – Ring expansion (benzyl sidechain)

Benzofuranone (10 mg/mL) in 1:1 EtOH/hydrazine hydrate (aq.) was stirred at 50 °C for 18 h then volatiles were removed *in vacuo* to give the crude product.

### General Procedure C – Trigger installation

To phenol in DMF (25 mg/mL) was added K<sub>2</sub>CO<sub>3</sub> (1.5 – 3 eq.), followed by chloromethyl nitroimidazole (1.1 eq.) then the mixture was stirred 7 - 18 h at room temperature or 50 °C, then diluted with water. Product was collected by filtration, or extracted from the aqueous fraction with EtOAc, dried (Na<sub>2</sub>SO<sub>4</sub>) and solvent was removed *in vacuo*.

### General Procedure D – Horner-Wadsworth-Emmons olefination

To a solution of phosphonate in THF (20 mg/mL) at -78 °C was added a 1M solution of LiHMDS in THF (1.1 eq.) dropwise and the resulting solution was stirred for 1 h. A solution of aldehyde in THF (30 mg/mL, 1.05 eq.) was added dropwise and the resulting mixture stirred a further 1 h at -78 °C, quenched with saturated aqueous NH<sub>4</sub>Cl, allowed to warm to room temperature and diluted with 1 M HCl. The aqueous fractions were extracted with EtOAc, dried (Na<sub>2</sub>SO<sub>4</sub>) and solvent was removed *in vacuo*.

### General Procedure E – Demethylation

To a solution of aryl ether in DCM (20 mg/mL) at 0 °C was added a 1 M solution of BBr<sub>3</sub> in DCM (6 eq.) and the mixture was stirred at room temperature for 18 h. The reaction was cooled to 0 °C and quenched by portionwise addition of ice, then the mixture was allowed to return to room temperature and extracted with DCM. The combined organic fractions were dried (Na<sub>2</sub>SO<sub>4</sub>) and solvent was removed *in vacuo*.

### 5-(chloromethyl)-1-methyl-2-nitro-1H-imidazole (16)

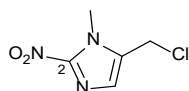

To alcohol **12** (1.0 g, 6.4 mmol) in THF (20 mL) was added DIPEA (1.3 mL, 7.6 mmol), and methanesulfonyl chloride (0.60 mL, 7.6 mmol). The resulting mixture was stirred 0.5 h, diluted with EtOAc (40 mL), washed with 1 M HCl (40 mL), dried (Na<sub>2</sub>SO<sub>4</sub>) and solvent was removed *in vacuo*. The crude product was purified by chromatography, eluting with a gradient (30-100%) of EtOAc/X4 to give the title compound (1.1 g, 98%) as a yellow solid: mp 99 – 100 °C (lit.<sup>2</sup> mp 94–96 °C).  $\delta_{\text{H}}$  (CDCl<sub>3</sub>) 7.19 (1H, s, 4-H), 4.63 (2H, s, CH<sub>2</sub>), 4.08 (3H, s, CH<sub>3</sub>). LRMS 176.1 (100%, M<sup>35</sup>+H), 178.1 (36%, M<sup>37</sup>+H). These data are in good agreement with literature values.<sup>2</sup>

### (E)-2-(4-Bromostyryl)-1-methyl-5-nitro-1H-imidazole (15)

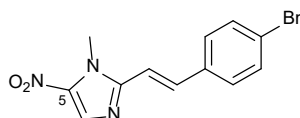

To EtOH (200 mL) was added sodium (2.0 g, 89 mmol) portionwise, with stirring until all sodium was consumed. 1,2-Dimethyl-5-nitro-1*H*-imidazole (5.0 g, 35 mmol) was added portionwise then the mixture was stirred for 0.5 h, and 4-bromobenzaldehyde added. The mixture was heated to 65 °C for 18 h, cooled to room temperature and partitioned between DCM (200 mL) and water (100 mL). The organic phase was collected and the aqueous fraction extracted twice more with DCM (200 mL), the combined organic fractions were washed with brine, dried (Na<sub>2</sub>SO<sub>4</sub>) and solvent was removed *in vacuo*. The crude product was purified by chromatography, eluting with EtOAc/X4 (33%) to give the title compound (3.6 g, 33%) as a yellow solid: mp 238 – 240 °C. δ<sub>H</sub> (CDCl<sub>3</sub>) 8.09 (1H, s, 4-CH), 7.82 (1H, d, *J* = 15.8 Hz, 2-CCH), 7.55 (2H, d, *J* = 8.5 Hz, 3'-H, 5'-H), 7.44 (2H, d, *J* = 8.4 Hz, 2'-H, 6'-H), 6.87 (1H, d, *J* = 15.8 Hz, 1'-CCH), 4.06 (3H, s, NCH<sub>3</sub>). LRMS (M+H) 308.9 (100%), 310.0 (100%). These data are consistent with literature values.<sup>3</sup>

### (1-Methyl-5-nitro-1*H*-imidazol-2-yl)methanol (**13**)

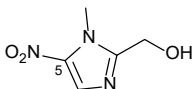

Ozone was bubbled through a solution of alkene **15** (0.6 g, 2.0 mmol) in DCM/MeOH (1:1, 54 mL) at -78 °C for 0.5 h with the headspace vented into a 10% aqueous solution of NaI. The ozone feed was switched with O<sub>2</sub> for 5 minutes, then N<sub>2</sub> for 30 minutes as the mixture was warmed to -40 °C. A solution of NaBH<sub>4</sub> (70 mg, 2.0 mmol) in EtOH (6 mL) was added dropwise over 0.5 h and the mixture was slowly warmed to room temperature, then a further portion of NaBH<sub>4</sub> (70 mg, 2.0 mmol) was added and the reaction stirred for 3 h, treated with AcOH (2.5 mL) and solvent was removed *in vacuo*. The crude product was purified by chromatography, eluting with EtOAc to give the title product (0.23 g, 74%) as a tan solid: mp 111 – 113 °C (lit.<sup>4</sup> 115 – 116 °C). δ<sub>H</sub> 8.01 (1H, s, 4-CH), 5.68 (1H, t, *J* = 5.7 Hz, OH), 4.58 (2H, d, *J* = 5.6 Hz, CH<sub>2</sub>), 3.91 (3H, s, NCH<sub>3</sub>). LRMS (M+H) 158.2 (100%).

### 2-(Chloromethyl)-1-methyl-5-nitro-1*H*-imidazole (**17**)

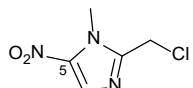

To alcohol **13** (0.10 g, 0.64 mmol) in THF (2 mL) was added DIPEA (0.13 mL, 0.76 mmol) and methanesulfonyl chloride (0.060 mL, 0.76 mmol). The resulting mixture was stirred for 0.5 h, diluted with EtOAc (10 mL), washed with 1M HCl (10 mL), dried (Na<sub>2</sub>SO<sub>4</sub>) and solvent was removed *in vacuo*. The crude product was purified by chromatography, eluting with 50% EtOAc/X4, to give the title compound (94 mg, 86%) as a beige solid: mp 39 – 40 °C (lit.<sup>4</sup> 43.5 – 44 °C). δ<sub>H</sub> (CDCl<sub>3</sub>) 7.96 (1H, s, 4-H), 4.68 (2H, s, CH<sub>2</sub>), 4.05 (3H, s, NCH<sub>3</sub>). LRMS (M+H) 176.1 (100%), 178.1 (32%). These data are in good agreement with literature values.<sup>4</sup>

**4-(3-(4-(Cyclopropanecarbonyl)piperazine-1-carbonyl)-4-fluorobenzyl)-2-((1-methyl-2-nitro-1H-imidazol-5-yl)methyl)phthalazin-1(2H)-one (18)**

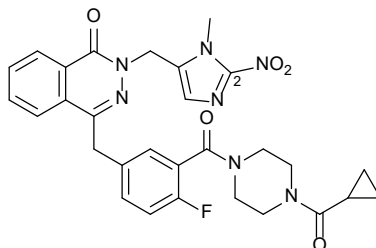

To olaparib (0.30 g, 0.69 mmol) in DMF (5 mL) was added Cs<sub>2</sub>CO<sub>3</sub> (0.45 g, 1.4 mmol) followed by chloride **16** (0.18 g, 1.5 mmol) and the resulting mixture was stirred for 25 h. The mixture was diluted with water (25 mL), filtered and the resulting solid collected by filtration. The crude compound was purified by semi-preparative HPLC (MeCN, NH<sub>4</sub>CO<sub>2</sub>H) to give the title compound (0.08 g, 20%) as a colourless solid: mp 122 – 125 °C.  $\delta_{\text{H}}$  8.32 (1H, dd,  $J = 7.7, 1.2$  Hz, 8-H), 8.03 (1H, br d,  $J = 7.6$  Hz, 5-H), 7.93 (1H, br dd,  $J = 8.3, 1.2$  Hz, 6-H), 7.87 (1H, td,  $J = 7.9, 1.2$  Hz, 7-H), 7.45 – 7.40 (1H, m, 6'-H), 7.35 (1H, br d,  $J = 5.1$  Hz 2'-H), 7.21 (1H, t,  $J = 9.0$  Hz, 5'-H), 7.15 (1H, s, 4'''-H), 5.43 (2H, s, 2-NCH<sub>2</sub>), 4.35 (2H, s, 4-CCH<sub>2</sub>), 3.94 (3H, s, NCH<sub>3</sub>), 3.85 – 3.10 (8H, m, 2''-CH<sub>2</sub>, 3''-CH<sub>2</sub>, 5''-CH<sub>2</sub>, 6''-CH<sub>2</sub>), 2.07 – 1.86 (1H, m, 1'''-CH), 0.78 – 0.67 (4H, m, 2'''-CH<sub>2</sub>, 3'''-CH<sub>2</sub>).  $\delta_{\text{C}}$  171.8 (4''-NC=O), 164.5 (1''-NC=O), 158.5 (1-C=O), 156.8 (4'-C,  $J_{\text{C-F}} = 244.7$  Hz), 146.1 (4-C, 2'''-C), 134.8 (1'-C,  $J_{\text{C-C-C-F}} = 3.1$  Hz), 134.4 (5'''-C), 134.2 (6-CH), 132.6 (7-CH), 132.4 (6'-CH,  $J_{\text{C-C-C-F}} = 8.0$  Hz), 129.5 (2'-CH,  $J_{\text{C-C-C-F}} = 3.7$  Hz), 129.1 (4a-C), 128.9 (4'''-CH), 127.8 (8a-C), 127.0 (8-CH), 126.1 (5-CH), 124.1 (3'-C,  $J_{\text{C-C-F}} = 18.1$  Hz), 116.3 (5'-CH,  $J_{\text{C-C-F}} = 21.6$  Hz), 47.5 - 44.8 and 42.5 – 41.4 (m, 2''-CH<sub>2</sub>, 3''-CH<sub>2</sub>, 5''-CH<sub>2</sub>, 6''-CH<sub>2</sub>), 44.0 (NCH<sub>2</sub>), 36.8 (4-CCH<sub>2</sub>), 34.9 (NCH<sub>3</sub>), 10.8 (1'''-CH), 7.6 (2'''-CH<sub>2</sub>, 3'''-CH<sub>2</sub>). HRMS calcd for C<sub>29</sub>H<sub>29</sub>FN<sub>7</sub>O<sub>5</sub> (M+H)  $m/z$  564.2209, found 574.2203 (-1.02 ppm). HPLC purity 99.7%

**2-Fluoro-5-formylbenzoic acid (22)**

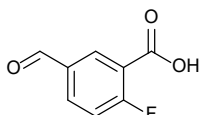

5-(Diethoxymethyl)-2-fluorobenzonitrile

To 2-fluoro-5-formylbenzonitrile (5.0 g, 34 mmol) and NH<sub>4</sub>Cl (0.36 g, 6.7 mmol) in EtOH (45 mL) at 0 °C was added triethyl orthoformate (8.4 mL, 50 mmol) and the mixture was warmed to room temperature and stirred for 18 h. Solvent was removed *in vacuo*, residual solids were separated by filtration, washing with EtOAc, then solvent was removed *in vacuo* and the crude product was purified by chromatography, eluting with 30% EtOAc/X4 to give the title compound (6.3 g, 84%) as a colourless oil.  $\delta_{\text{H}}$  (CDCl<sub>3</sub>) 7.77 (1H, dd,  $J = 6.1, 2.1$  Hz, 6-H), 7.71 (1H, ddd,  $J = 8.7, 5.2, 2.2$  Hz, 4-H), 7.20 (1H, t,  $J = 8.7$  Hz, 3-H) 5.49 (1H, s, 5-CCH), 3.64 – 3.48 (4H, m, 2 × CH<sub>2</sub>), 1.25 (6H, t,  $J = 7.1$  Hz, 2 × CH<sub>3</sub>). These data are in good agreement with literature values.<sup>5</sup>

2-Fluoro-5-formylbenzoic acid

3 M NaOH (32 mL) was added to 5-(diethoxymethyl)-2-fluorobenzonitrile (6.0 g, 27 mmol) and this slurry was heated to 90 °C for 3 h. The resulting solution was cooled to 0 °C, the pH was adjusted to 2 with 6M HCl and the resulting precipitate collected by filtration. Refiltration of the mother liquor after standing produced a second crop. Combination of crops gave the title compound (4.3 g, 95%) as a white solid: mp 160 – 163 °C.  $\delta_{\text{H}}$  (CDCl<sub>3</sub>) 10.00 (1H, s, CHO), 8.57 (1H, dd,  $J$  = 6.9, 2.2 Hz, 6-H), 8.16 (1H, ddd,  $J$  = 8.6, 4.6, 2.2 Hz, 4-H), 7.36 (1H, dd,  $J$  = 10.0, 8.6 Hz, 3-H), CO<sub>2</sub>H not observed. These data are in good agreement with literature values.<sup>5</sup> LRMS (M-H) 167.1 (100%).

#### 4-(Cyclopropanecarbonyl)piperazin-1-ium chloride (20)

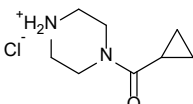

Piperazine (4.6 g, 52 mmol) was dissolved in acetic acid (50 mL) at 40 °C and the resulting solution was cooled to room temperature. Cyclopropanecarbonyl chloride (5.2 mL, 58 mmol) was added dropwise, then the resulting mixture was stirred for 18 h, and the resulting precipitate was collected by filtration. The filtrate was suspended in PhMe (25 mL) and evaporated to dryness twice, then suspended again in PhMe (30 mL) and stirred overnight, the precipitate was collected by filtration and dried *in vacuo* to give the title compound (8.2 g, 82%) as white crystals.  $\delta_{\text{H}}$  9.05 (2H, br s, NH<sub>2</sub><sup>+</sup>Cl<sup>-</sup>), 4.00 – 3.56 (4H, m, 2 × NCH<sub>2</sub>), 3.22 – 2.98 (4H, m, 2 × NCH<sub>2</sub>), 2.03 – 1.95 (1H, m, 1'-H), 0.80 – 0.70 (4H, m, 2'-CH<sub>2</sub>, 3'-CH<sub>2</sub>). LRMS (M+) 155.2 (100%)

#### 3-(4-(Cyclopropanecarbonyl)piperazine-1-carbonyl)-4-fluorobenzaldehyde (19)

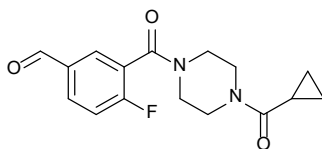

To aldehyde **22** (4.0 g, 24 mmol) in PhMe (100 mL) was added thionyl chloride (17.3 mL, 238 mmol) and the resulting solution was heated to reflux for 1 h, allowed to cool and volatiles removed by vacuum distillation. The crude residue was taken up in DCM (70 mL) and amide **20** (5.0 g, 26 mmol) was added as a solution in MeCN/NEt<sub>3</sub> (30/7 mL). The resulting mixture was stirred 18 h at room temperature, diluted with saturated NaHCO<sub>3</sub> (30 mL), the aqueous layer extracted with EtOAc (2 × 30 mL), the combined organic fractions washed with water (30 mL), brine (30 mL), dried (Na<sub>2</sub>SO<sub>4</sub>) and solvent was removed *in vacuo*. The crude product was purified by chromatography, eluting with EtOAc (100%) to give the title compound (4.7 g, 65%) as a white foam.

$\delta_{\text{H}}$  10.01 (1H, s CHO), 8.12 – 7.98 (2H, m, H-2, H-6), 7.57 (1H, t,  $J$  = 9.0 Hz, H-5), 3.93 – 3.13 (8H, m, 4 × NCH<sub>2</sub>), 2.11 – 1.81 (1H, m, 1'-H), 0.83 – 0.62 (4H, m, 2''-CH<sub>2</sub>, 3''-CH<sub>2</sub>).  $\delta_{\text{C}}$  191.3 (CHO), 171.3 (4'-NC=O), 163.1 (1'-NC=O), 161.0 (4-C,  $J_{\text{C-F}}$  254.7 Hz), 133.2 (1-C,  $J_{\text{C-C-C-F}}$  = 2.8 Hz), 132.7 (6-CH,  $J_{\text{C-C-C-F}}$  = 10.0 Hz), 131.0 (2-CH,  $J_{\text{C-C-C-F}}$  = 5.6 Hz), 124.8 (3-C,  $J_{\text{C-C-F}}$  = 19.4 Hz), 117.2 (5-CH,  $J_{\text{C-C-F}}$  = 22.8 Hz), 46.9 – 46.1, 45.1 – 44.3 and 42.1 – 41.0 (m, 4 × NCH<sub>2</sub>), 10.4 (2''-CH<sub>2</sub>, 3''-CH<sub>2</sub>), 7.13 (1''-CH). HRMS calcd for C<sub>16</sub>H<sub>18</sub>FN<sub>2</sub>O<sub>3</sub> (M+H)  $m/z$  305.1296, found 305.1293 (-0.86 ppm).



### 3-(Benzyloxy)-*N,N*-diethylbenzamide (26)

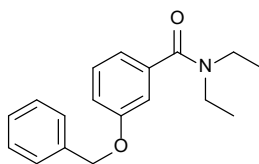

#### *N,N*-Diethyl-3-hydroxybenzamide

To 3-hydroxybenzoic acid (6.0 g, 43 mmol) was added thionyl chloride (24 mL, 330 mmol) followed by two drops of DMF (~0.1 mL) and the resulting mixture was stirred at reflux for 1 h. Thionyl chloride was evaporated *in vacuo*, the residue was dissolved in PhMe (100 mL) and the solution once more evaporated to dryness. The residue was dissolved in THF (50 mL) and cooled to 0 °C, then diethylamine (13.5 mL, 130 mmol) was added slowly and the mixture stirred for 18 h at room temperature. Solvent was removed *in vacuo*, the residue dissolved in DCM (50 mL) and the organic layer washed with water (50 mL), NaHCO<sub>3</sub> (50 mL) and brine (50 mL) then solvent was removed *in vacuo* to give the title compound (4.0 g, 48%) as a brown solid: mp 74 – 77 °C (lit. 84 °C<sup>6</sup>).  $\delta_{\text{H}}$  (CDCl<sub>3</sub>) 7.76 (1H, br s OH), 7.17 (1H, t,  $J = 7.8, 7.8$  Hz, 5-H), 6.90 (1H, m, 2-H), 6.81 – 6.77 (2H, m, 4-H, 6-H), 3.61 – 3.49 (2H, m, CH<sub>2</sub>), 3.34 – 3.21 (2H, m, CH<sub>2</sub>), 1.25 (3H, t, 6.6 Hz, CH<sub>3</sub>), 1.10 (3H, t, 6.6 Hz, CH<sub>3</sub>). These data are in good agreement with literature values.<sup>6</sup> LRMS (M+H) 194.2, (M-H) 192.2

#### 3-(Benzyloxy)-*N,N*-diethylbenzamide

To *N,N*-diethyl-3-hydroxybenzamide (0.50 g, 2.6 mmol) in acetone (25 mL) at 0 °C was added K<sub>2</sub>CO<sub>3</sub> (0.72 g, 5.2 mmol), KI (0.04 g, 0.26 mmol) and benzyl bromide (0.34 mL, 2.9 mmol), then the mixture was stirred at room temperature for 18 h. Volatiles were removed *in vacuo* and the residue was partitioned between water (25 mL) and EtOAc (25 mL). The organic fraction was collected and the aqueous fraction was washed with EtOAc (2 × 25 mL), then the combined organic fractions were washed with brine, dried (Na<sub>2</sub>SO<sub>4</sub>) and solvent was removed *in vacuo*. The crude product was purified by chromatography, eluting with 30% EtOAc/X4 to give the title compound (0.73 g, quant.) as a golden oil.  $\delta_{\text{H}}$  (CDCl<sub>3</sub>) 7.45 – 7.27 (6H, m, Ar-H), 7.03 – 6.92 (3H, m, Ar-H), 5.08 (2H, s, CH<sub>2</sub>), 3.63 – 3.43 (2H, m, CH<sub>2</sub>), 3.33 – 3.12 (2H, m, CH<sub>2</sub>), 1.31 – 0.98 (6H, m, 2 × CH<sub>3</sub>). These data are in good agreement with literature values.<sup>7</sup> LRMS (M+H) 284.2.

### 3-(Benzyloxy)-*N,N*-diethyl-2-formylbenzamide (27)

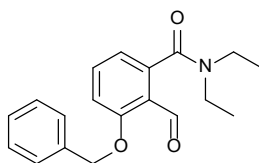

To THF (50 mL) at -78 °C under an atmosphere of N<sub>2</sub> was added <sup>t</sup>BuLi in pentane (1.6 M, 10.1 mL, 16.2 mmol) followed by a solution of benzamide **26** (2.0 g, 7.0 mmol) in THF (20 mL) dropwise. The solution was stirred at -78 °C for 1 h, then DMF (1.1 mL, 14.1 mmol) was added dropwise and the mixture allowed to warm to room temperature, After stirring a further 15 min, the reaction was quenched

with saturated aqueous  $\text{NH}_4\text{Cl}$  (10 mL) and the aqueous fraction was extracted with EtOAc ( $2 \times 50$  mL). The combined organic fractions were washed with water (50 mL), dried ( $\text{Na}_2\text{SO}_4$ ) and solvent was removed *in vacuo*. The crude product was purified by chromatography, eluting with 60% EtOAc/X4, to give the title compound (1.2 g, 56%) as a yellow oil.  $\delta_{\text{H}}$  ( $\text{CDCl}_3$ ) 10.56 (1H, s, CHO), 7.52 (1H, t,  $J = 8.0$  Hz, 5-H), 7.48 – 7.33 (5H, m, Ar-H), 7.06 (1H, d,  $J = 8.0$  Hz, 4-H), 6.85 (1H, d,  $J = 7.5$  Hz 6-H), 5.21 (2H, s,  $\text{OCH}_2$ ), 3.59 (2H, q,  $J = 8.0$  Hz,  $\text{NCH}_2$ ), 3.07 (2H, q,  $J = 7.15$  Hz,  $\text{NCH}_2$ ), 1.32 (3H, t,  $J = 7.1$  Hz,  $\text{CH}_3$ ), 1.01 (3H, t,  $J = 7.1$  Hz,  $\text{CH}_3$ ).  $\delta_{\text{C}}$  ( $\text{CDCl}_3$ ) 189.5 ( $\text{HC}=\text{O}$ ), 170.0 (1- $\text{CC}=\text{O}$ ), 161.6 (3-C), 139.6 (1-C), 135.9 (Ar-C), 135.7 (5-CH), 129.0 ( $2 \times$  Ar-CH), 128.6 (Ar-CH), 127.6 ( $2 \times$  Ar-CH), 121.8 (2-C), 119.7 (6-CH), 113.4 (4-CH), 71.1 ( $\text{OCH}_2$ ), 42.7, 38.9 ( $2 \times$   $\text{NCH}_2$ ), 13.7, 12.4 ( $2 \times$   $\text{CH}_3$ ). LRMS (M+H) 312.2.

### Dimethyl (7-(benzyloxy)-3-oxo-1,3-dihydroisobenzofuran-1-yl)phosphonate (28)

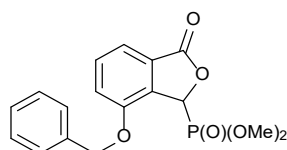

To *tert*-butyldimethylsilyl dimethyl phosphite (2.4 g, 11 mmol) in benzene (30 mL) was added a solution of benzamide **27** (1.7 g, 5.5 mmol) in benzene (8 mL) and the resulting mixture was stirred 18 h at room temperature. Volatiles were removed *in vacuo* and the residue dissolved in MeOH (25 mL), then methanesulfonic acid (0.75 mL, 11 mmol) in MeOH (12 mL) was added slowly. The resulting mixture was stirred at room temperature for 12 h, then volatiles removed *in vacuo*, the slurry diluted with water (25 mL), the aqueous fraction was extracted with DCM ( $3 \times 25$  mL) and the combined organic fractions were washed with  $\text{NaHCO}_3$  (25 mL), brine (25 mL), dried ( $\text{Na}_2\text{SO}_4$ ) and solvent was removed *in vacuo*. The crude product was purified by chromatography, eluting with 50% EtOAc/X4, to give the title compound (1.1 g, 56%) as a golden oil that solidified on standing: mp 81 – 83 °C.  $\delta_{\text{H}}$  ( $\text{CDCl}_3$ ) 7.56 – 7.47 (4H, m, Ar-H), 7.43 – 7.33 (3H, m, Ar-H), 7.21 (1H, m, 6-H), 5.78 (1H, d,  $J = 9.8$  Hz, 1-H), 5.22 (2H,  $\text{OCH}_2$ ), 3.73 (3H, d,  $J = 10.7$  Hz,  $\text{OCH}_3$ ), 3.69 (3H, d,  $J = 10.9$  Hz,  $\text{OCH}_3$ ).  $\delta_{\text{C}}$  ( $\text{CDCl}_3$ ) 169.7 ( $\text{C}=\text{O}$ , d,  $J = 2.2$  Hz), 156.7 (7a-C), 154.0 (7-C, d,  $J_{\text{C-C-C-P}} = 3.5$  Hz), 135.9 (Ar-C), 132.2 (3a-C, d,  $J_{\text{C-C-C-P}} = 4.5$  Hz), 131.9 (4-CH, d,  $J_{\text{C-C-C-C-P}} = 2.4$  Hz), 128.9 ( $2 \times$  Ar-CH), 128.6 (Ar-CH), 127.7 ( $2 \times$  Ar-CH), 118.3 (5-CH, d,  $J_{\text{C-C-C-C-P}} = 1.5$  Hz), 117.3 (6-CH, d,  $J_{\text{C-C-C-C-P}} = 2.2$  Hz), 75.4 (1-CH,  $J_{\text{C-P}} = 168.1$  Hz), 70.9 ( $\text{CH}_2$ ), 54.8 ( $\text{CH}_3$ ,  $J_{\text{C-O-P}} = 6.6$  Hz) 54.3 ( $\text{CH}_3$ ,  $J_{\text{C-O-P}} = 7.2$  Hz). LRMS (M+H) 349.1.

### Dimethyl (7-hydroxy-3-oxo-1,3-dihydroisobenzofuran-1-yl)phosphonate (23)

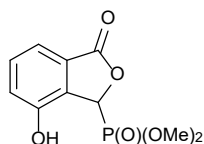

To phosphonate **28** (0.88 g, 2.9 mmol) in MeOH (25 mL) was added 5% w/w Pd/C (0.09 g) and the resulting slurry was stirred under 1 atm.  $\text{H}_2$  for 18 h, filtered through diatomaceous earth and solvent was removed *in vacuo*. The crude material was purified by chromatography, eluting with a gradient (1 – 2%) of MeOH/DCM to give the title compound (0.55 g, 85%) as a white solid: mp 151 – 154 °C.  $\delta_{\text{H}}$  ( $\text{CDCl}_3$ ) 9.08 (1H, br s, OH), 7.56 – 7.48 (2H, m, 4-H, 5-H), 7.28 (1H, dd,  $J = 7.4, 1.8$  Hz, 6-H), 5.73

(1H, d,  $J = 8.5$  Hz, 1-H), 4.04 (3H, d,  $J = 10.9$  Hz, OCH<sub>3</sub>), 3.58 (3H, d,  $J = 10.5$  Hz, OCH<sub>3</sub>).  $\delta_c$  (CDCl<sub>3</sub>) 169.6 (C=O, d,  $J_{C-O-C-P} = 3.1$  Hz), 152.4 (7-C, d,  $J_{C-C-C-P} = 2.9$  Hz), 132.3 (5-CH, d,  $J_{C-C-C-C-P} = 2.1$  Hz), 128.2 (3a-C, d,  $J_{C-C-C-P} = 3.7$  Hz), 126.2 (7a-C, d,  $J_{C-C-P} = 4.2$  Hz), 124.1 (6-CH, d,  $J_{C-C-C-C-P} = 2.1$  Hz), 118.4 (4-CH, d,  $J_{C-C-C-C-P} = 1.5$  Hz), 73.6 (1-CH,  $J = 163.7$  Hz), 55.7 (CH<sub>3</sub>,  $J_{C-O-P} = 7.4$  Hz), 55.3 (CH<sub>3</sub>,  $J_{C-O-P} = 7.2$  Hz). LRMS (M+H) 259.1.

### 3-Benzylidene-4-hydroxyisobenzofuran-1(3H)-one (33)

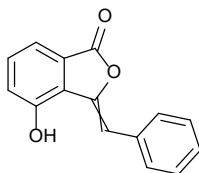

To a solution of phosphonate **23** (0.20 g, 0.77 mmol) in THF (10 mL) at -78 °C was added a 1 M solution of LiHMDS in THF (1.7 mL, 1.7 mmol) dropwise and the resulting solution was stirred 1 h. A solution of benzaldehyde (0.08 mL, 0.8 mmol) in THF (30 mL) was added dropwise and the resulting mixture stirred a further 1 h at -78 °C, then stirred at room temperature for 18 h, quenched with saturated aqueous NH<sub>4</sub>Cl, and diluted with 1 M HCl. The aqueous fractions were extracted with EtOAc (3 × 10 mL), dried (Na<sub>2</sub>SO<sub>4</sub>) and solvent was removed *in vacuo*. The crude product was purified by chromatography, eluting with 33% EtOAc/X4, to give the title product (0.13 g, 72%) as a cream solid. Further chromatography prepared samples of the alkene isomers for analysis.

**E**:  $\delta_H$  10.85 (1H, br s, OH), 7.51 (1H, t,  $J = 7.7$  Hz, 6-H), 7.39 (1H, dd,  $J = 7.4, 0.7$  Hz, 7-H), 7.36 – 7.24 (5H, m, Ar-H), 7.14 (1H, d,  $J = 8.1$  Hz, 5-H), 6.99 (1H, s, 3-C=CH).  $\delta_c$  166.1 (C=O), 153.6 (4-C), 144.4 (3-C), 133.8 (Ar-C), 132.2 (6-CH), 130.7 (2 × Ar-CH), 127.7 (7a-C), 127.1 (Ar-CH), 126.8 (2 × Ar-CH), 122.8 (3a-C), 121.5 (5-CH), 115.4 (7-CH), 112.4 (3-C=CH)

**Z**:  $\delta_H$  11.30 (1H, br s, OH), 7.79 (2H, d,  $J = 8.2$  Hz, 2 × Ar-CH), 7.54 – 7.37 (4H, m, 6-H, 7-H, 2 × Ar-CH), 7.37 – 7.21 (2H, m, 5-H, Ar-CH), 6.85 (1H, s, 3-C=CH).  $\delta_c$  166.5 (C=O), 153.4 (4-C), 143.7 (3-C), 133.8 (Ar-C), 131.6 (6-CH), 129.7 (2 × Ar-CH), 128.8 (2 × Ar-CH), 128.0 (Ar-CH), 125.5 (3a-C), 124.4 (7a-C), 121.2 (5-CH), 115.7 (7-CH), 109.2 (3-C=CH). LRMS (M+H) 239.2.

### 4-Benzyl-5-hydroxyphthalazin-1(2H)-one (38)

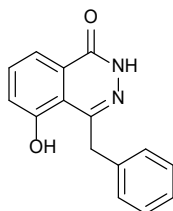

The reaction was carried out according to General Procedure B with benzofuranone **33** (44 mg, 0.19 mmol) to give the title product (47 mg, quant.) as a white solid: mp 222 – 224 °C.  $\delta_H$  12.43 (1H, s, NH), 10.84 (1H, br s, OH), 7.70 (1H, dd,  $J = 7.8, 1.2$  Hz, 8-H), 7.58 (1H, t,  $J = 7.9$  Hz, 7-H), 7.27 – 7.11 (6H, m, 6-H, Ar-H), 4.42 (2H, s, CH<sub>2</sub>).  $\delta_c$  159.0 (C), 155.0 (5-C), 144.2 (4-C), 139.9 (Ar-C), 132.3 (7-CH), 129.7 (8a-C), 128.4 (2 × Ar-CH), 128.1 (2 × Ar-CH), 125.7 (Ar-CH), 119.6 (8-CH), 118.2 (4a-C), 116.3

(6-CH), 59.7 (CH<sub>2</sub>). HRMS calcd for C<sub>15</sub>H<sub>13</sub>N<sub>2</sub>O<sub>2</sub> (M+H) *m/z* 253.0972, found 253.0963 (-3.45 ppm). HPLC purity 99.2%.

**(Z)-3-Benzylidene-4-((1-methyl-2-nitro-1H-imidazol-5-yl)methoxy)isobenzofuran-1(3H)-one (41)**

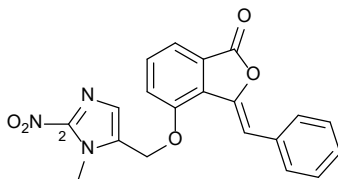

The reaction was carried out according to General Procedure C with benzofuranone **33** (54 mg, 0.23 mmol), K<sub>2</sub>CO<sub>3</sub> (0.10 g, 0.69 mmol) and chloride **16** (44 mg, 0.25 mmol) stirring for 7 h at 50 °C. The crude product was collected by extraction and purified by chromatography, eluting with 70% EtOAc/X4 to give the title product (47 mg, 52%) as a white solid: mp 221 – 224 °C. δ<sub>H</sub> 7.79 – 7.73 (3H, m, 5-H, 2'-H, 6'-H), 7.67 (1H, t, *J* = 7.8 Hz, 6-H), 7.62 – 7.58 (1H, m, 7-CH), 7.50 – 7.42 (3H, m, 3'-H, 5'-H, 4''-H), 7.37 – 7.31 (1H, m, 4'-H), 6.79 (1H, s, 3-C=CH), 5.62 (2H, s, OCH<sub>2</sub>), 4.06 (3H, s, CH<sub>3</sub>). δ<sub>C</sub> 166.0 (1-C=O), 152.6 (4-C), 146.5 (2''-C), 143.0 (3-C), 133.4 (1'-C), 132.4 (5''-C), 131.9 (6-CH), 129.9 (2'-CH, 6'-CH), 129.0 (4''-CH), 128.9 (3'-CH, 5'-CH), 128.4 (4'-CH), 127.2 (3a-C), 124.7 (7a-C), 118.5 (5-CH), 117.8 (7-CH), 110.4 (3-C=CH), 59.8 (OCH<sub>2</sub>), 34.5 (NCH<sub>3</sub>). LRMS (M-H) 376.9, (M- M-C<sub>5</sub>H<sub>6</sub>N<sub>3</sub>O<sub>2</sub>) 237.2.

**4-Benzyl-5-((1-methyl-2-nitro-1H-imidazol-5-yl)methoxy)phthalazin-1(2H)-one (44)**

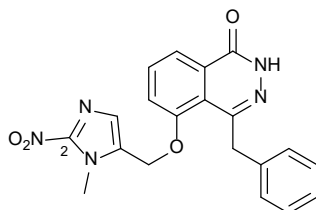

The reaction was carried out according to General Procedure B with benzofuranone **41** (50 mg, 0.13 mmol) to give the title product (43 mg, 84%) as a white solid: mp 280 – 283 °C. δ<sub>H</sub> 12.66 (1H, s, NH), 7.94 (1H, dd, *J* = 7.9, 1.0 Hz, 8-H), 7.82 (1H, t, *J* = 8.0 Hz, 7-H), 7.64 (1H, dd, *J* = 8.2, 0.9 Hz, 6-H), 7.24 (1H, s, 4'-H), 7.10 – 7.03 (3H, m, Ar-H), 6.76 – 6.71 (2H, m, Ar-H), 5.27 (2H, s, OCH<sub>2</sub>), 4.26 (2H, s, CH<sub>2</sub>), 3.60 (3H, s, CH<sub>3</sub>). δ<sub>C</sub> 158.7 (1-C=O), 154.2 (5-C), 146.0 (2'-C), 142.5 (4-C), 139.7 (Ar-C), 132.5 (7-CH), 132.4 (5'-C), 129.8 (8a-C), 129.1 (4'-CH), 127.9 (2 × Ar-CH), 127.2 (2 × Ar-CH), 125.5 (Ar-CH), 119.9 (4a-C), 118.6 (8-CH), 116.4 (6-CH), 59.6 (OCH<sub>2</sub>), 41.7 (4-CCH<sub>2</sub>), 33.8 (NCH<sub>3</sub>). HRMS calcd for C<sub>20</sub>H<sub>17</sub>N<sub>5</sub>NaO<sub>4</sub> (M+Na) *m/z* 414.1173, found 414.1174 (0.4 ppm). HPLC purity 98.6%

**3-(3-(4-(Cyclopropanecarbonyl)piperazine-1-carbonyl)-4-fluorobenzylidene)-4-hydroxyisobenzofuran-1(3H)-one (47)**

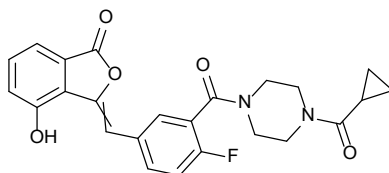

The reaction was carried out according to General Procedure D with phosphonate **23** (0.50 g, 1.94 mmol), LiHMDS (4.1 mL) and aldehyde **19** (0.62 g, 1.1 mmol). The crude product was purified by chromatography, eluting with 80% EtOAc/X4 to give the title product (0.58 g, 68%) as a yellow foam. Further chromatography prepared samples of the alkene isomers for analysis.

**E**:  $\delta_{\text{H}}$  10.84 (1H, br s, OH), 7.53 (1H, t,  $J = 7.7$  Hz, 6-H), 7.43 – 7.36 (2H, m, 7-H, 6'-H), 7.32 – 7.25 (2H, m, 2'-H, 5'-H), 7.16 (1H, br d, 7.5 Hz, 5-H), 6.98 (1H, s, 3-C=CH), 3.82 – 3.22 (8H, m, 2''-CH<sub>2</sub>, 3''-CH<sub>2</sub>, 5''-CH<sub>2</sub>, 6''-CH<sub>2</sub>), 2.07 – 1.85 (1H, m, 1'''-CH), 0.81 – 0.66 (4H, m, 2'''-CH<sub>2</sub>, 3'''-CH<sub>2</sub>).  $\delta_{\text{C}}$  171.3 (4''-NC=O), 166.0 (1-C=O), 164.0 (1''-NC=O) 156.9 (4'-C, d,  $J_{\text{C-F}} = 245.8$  Hz), 153.4 (4-C), 145.3 (3-C), 133.3 (6'-CH, m), 132.5 (6-CH), 131.0 (1'-C,  $J_{\text{C-C-C-F}} = 3.1$  Hz), 130.4 (2'-CH, d,  $J_{\text{C-C-C-F}} = 2.9$  Hz), 127.7 (3a-C), 122.6 (7a-C), 122.4 (3'-C, d,  $J_{\text{C-C-F}} = 18.4$ ), 121.6 (5-CH), 115.7 (7-CH), 114.4 (5'-CH,  $J_{\text{C-C-F}} = 21.8$  Hz), 110.5 (3-C=CH), 10.39 (1'''-CH), 7.12 (2'''-CH<sub>2</sub>, 3'''-CH<sub>2</sub>), 4 × CH<sub>2</sub> not observed. LRMS (M+H) 437.2 (100%), (M-H) 435.1 (100%).

**Z**:  $\delta_{\text{H}}$  11.38 (1H, br s, OH), 7.97 – 7.89 (1H, m, 6'-H), 7.86 (1H, dd,  $J = 6.4, 1.9$  Hz, 2'-H), 7.51 (1H, t,  $J = 7.7$  Hz, 6-H), 7.46 – 7.38 (2H, m, 7-H, 5'-H), 7.30 (1H, dd,  $J = 8.0, 0.61$  Hz 5-H), 6.87 (1H, s, 3-C=CH), 3.87 – 3.22 (8H, m, 2''-CH<sub>2</sub>, 3''-CH<sub>2</sub>, 5''-CH<sub>2</sub>, 6''-CH<sub>2</sub>), 2.09 – 1.87 (1H, m, 1'''-CH), 0.80 – 0.65 (4H, m, 2'''-CH<sub>2</sub>, 3'''-CH<sub>2</sub>).  $\delta_{\text{C}}$  171.3 (4''-NC=O), 166.3 (1-C=O), 163.8 (1''-NC=O), 156.8 (4'-C, d,  $J_{\text{C-F}} = 250.3$  Hz), 153.4 (4-C), 144.0 (3-C), 132.7 (6'-CH, d,  $J_{\text{C-C-C-F}} = 8.4$  Hz), 131.9 (6-CH), 130.9 (1'-C, d,  $J_{\text{C-C-C-F}} = 3.3$  Hz), 129.9 (2'-CH, d,  $J_{\text{C-C-C-F}} = 3.2$  Hz), 125.2 (3a-C), 124.4 (7a-C), 124.3 (3'-C, d,  $J_{\text{C-C-F}} = 18.3$  Hz), 121.3 (5-CH), 116.5 (5'-CH, d,  $J_{\text{C-C-F}} = 22.0$  Hz), 115.9 (7-CH), 107.2 (3-C=CH), 10.37 (1'''-CH), 7.13 (2'''-CH<sub>2</sub>, 3'''-CH<sub>2</sub>), 4 × CH<sub>2</sub> not observed. LRMS (M+H) 437.2 (100%), (M-H) 435.1 (100%).

### 3-(3-(4-(Cyclopropanecarbonyl)piperazine-1-carbonyl)-4-fluorobenzylidene)-4-((1-methyl-2-nitro-1H-imidazol-5-yl)methoxy)isobenzofuran-1(3H)-one (**52**)

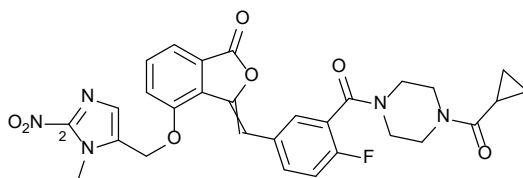

The reaction was carried out according to General Procedure C with benzofuranone **47** (90 mg, 0.21 mmol), K<sub>2</sub>CO<sub>3</sub> (44 mg, 0.32 mmol) and chloride **16** (40 mg, 0.23 mmol) stirring for 18 h at room temperature. The crude product was collected by filtration and triturated with MeOH to give the title product (70 mg, 58%) as a yellow solid. Further chromatography prepared samples of the alkene isomers for analysis.

**E**:  $\delta_{\text{H}}$  7.79 – 7.66 (2H, m, 5-H, 6-H), 7.63 (1H, br d,  $J = 7.1$  Hz, 6-H), 7.34 – 7.29 (1H, m, 6'-H), 7.25 – 7.20 (1H, m, 2'-H), 7.06 (1H, s, 4'''-H), 7.05 (1H, s, 3-C=CH), 6.90 (1H, t,  $J = 9.0$  Hz, 5'-CH), 5.18 (2H, s, OCH<sub>2</sub>), 3.85 – 3.13 (8H, m, 2''-CH<sub>2</sub>, 3''-CH<sub>2</sub>, 5''-CH<sub>2</sub>, 6''-CH<sub>2</sub>), 3.48 (3H, s, NCH<sub>3</sub>), 2.09 – 1.86 (1H, m, 1'''-CH), 0.80 – 0.65 (4H, m, 2'''-CH<sub>2</sub>, 3'''-CH<sub>2</sub>).  $\delta_{\text{C}}$  171.8 (4''-NC=O), 165.6 (1-C=O), 163.8 (1''-NC=O), 157.0 (4'-C, d,  $J_{\text{C-F}} = 242.9$  Hz), 152.6 (4-C), 146.0 (2'''-C), 144.3 (3-C), 132.9 (6-CH), 132.7 (6'-CH, d,  $J_{\text{C-C-C-F}} = 6.6$  Hz), 131.6 (5'''-C), 130.7 (2'-CH, d,  $J_{\text{C-C-C-F}} = 3.5$  Hz), 130.5 (1'-C, d,  $J_{\text{C-C-C-C-F}} = 3.8$  Hz),

128.7 (4<sup>'''</sup>-CH), 128.0 (7a-C), 124.7 (3a-C), 122.4 (3'-C, d,  $J_{C-C-F} = 15.4$  Hz), 118.5 (5-CH), 117.7 (7-CH), 114.2 (5'-CH, d,  $J_{C-C-F} = 22.2$  Hz), 112.0 (3-C=CH), 59.9 (OCH<sub>2</sub>), 33.8 (NCH<sub>3</sub>), 10.36 (2<sup>'''</sup>-CH<sub>2</sub>, 3<sup>'''</sup>-CH<sub>2</sub>), 7.12 (1<sup>'''</sup>-CH), 4 × CH<sub>2</sub> not observed. LRMS (M+H) 576.2 (24%), (M-C<sub>5</sub>H<sub>6</sub>N<sub>3</sub>O<sub>2</sub>) 435.2 (100%).

**Z:**  $\delta_H$  7.93 – 7.86 (1H, m, 6'-H), 7.86 – 7.81 (1H, m, 2'-H), 7.77 (1H, d,  $J = 8.1$  Hz, 5-H), 7.68 (1H, t,  $J = 7.8$  Hz, 6-H), 7.60 (1H, d,  $J = 7.3$  Hz, 7-H), 7.47 (1H, s, 4<sup>'''</sup>-H), 7.42 (1H, t,  $J = 9.0$  Hz, 5'-H), 6.81 (1H, s, 3-C=CH), 5.62 (2H, s, OCH<sub>2</sub>), 4.05 (3H, s, NCH<sub>3</sub>), 3.87 – 3.19 (8H, m, 2<sup>''</sup>-CH<sub>2</sub>, 3<sup>''</sup>-CH<sub>2</sub>, 5<sup>''</sup>-CH<sub>2</sub>, 6<sup>''</sup>-CH<sub>2</sub>), 2.10 – 1.86 (1H, m, 1<sup>'''</sup>-CH), 0.80 – 0.67 (4H, m, 2<sup>'''</sup>-CH<sub>2</sub>, 3<sup>'''</sup>-CH<sub>2</sub>).  $\delta_C$  171.8 (4<sup>''</sup>-NC=O), 166.3 (1-C=O), 164.2 (1<sup>''</sup>-NC=O), 157.4 (4'-C, d,  $J_{C-F} = 249.2$  Hz), 153.2 (4-C), 147.0 (2<sup>'''</sup>-C), 143.8 (3-C), 133.6 (6'-CH, d,  $J_{C-C-C-F} = 8.2$  Hz), 132.9 (5<sup>'''</sup>-C), 132.6 (6-CH), 131.1 (1'-C, d,  $J_{C-C-C-C-F} = 3.5$  Hz), 130.6 (2'-CH, d,  $J_{C-C-C-F} = 3.1$  Hz), 129.6 (4<sup>'''</sup>-CH), 127.4 (3a-C), 125.2 (7a-C), 124.8 (3'-CH,  $J_{C-C-F} = 18.7$  Hz), 119.1 (5-CH), 118.4 (7-CH), 117.0 (5'-CH, d,  $J_{C-C-F} = 22.1$  Hz), 108.9 (3-C=CH), 60.3 (OCH<sub>2</sub>), 35.0 (NCH<sub>3</sub>), 10.9 (2<sup>'''</sup>-CH<sub>2</sub>, 3<sup>'''</sup>-CH<sub>2</sub>), 7.60 (1<sup>'''</sup>-CH), 4 × CH<sub>2</sub> not observed. LRMS (M+H) 576.2 (24%), (M-C<sub>5</sub>H<sub>6</sub>N<sub>3</sub>O<sub>2</sub>) 435.2 (100%).

### 5-Methoxyisobenzofuran-1(3H)-one (29)

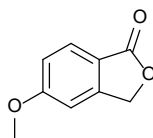

### 5-Methoxyisobenzofuran-1,3-dione

A solution of 4-methoxyphthalic acid (5.0 g, 26 mmol) in acetic anhydride (50 mL) was heated to reflux for 1 h, cooled and volatiles removed *in vacuo*. The crude residue was dissolved in EtOAc (100 mL) and evaporated to dryness to give the title compound (4.5 g, quant.) as a white solid: mp 91 – 93 °C.  $\delta_H$  8.00 (1H, d,  $J = 8.4$  Hz, 6-H), 7.59 (1H, d,  $J = 2.2$  Hz, 4-H), 7.49 (1H, dd,  $J = 8.4, 2.3$  Hz, 6-H), 3.97 (3H, s, OCH<sub>3</sub>). These data are in good agreement with literature values.<sup>8</sup> LRMS (M-CH<sub>3</sub>) 163.1.

### 5-Methoxyisobenzofuran-1(3H)-one

To NaBH<sub>4</sub> (0.96 g, 25 mmol) in THF (40 mL) at 0 °C was added dropwise a solution of 5-methoxyisobenzofuran-1,3-dione (4.5 g, 25 mmol) in THF (50 mL). The resulting mixture was stirred for 1.5 h at room temperature, then cooled to 0 °C, acidified to pH 1 with 6 M HCl, and the aqueous fraction was extracted with Et<sub>2</sub>O (5 × 50 mL), then solvent was removed *in vacuo*. The resulting residue was taken up in 6 M HCl (50 mL) and stirred at reflux for 18 h, then cooled to room temperature and the aqueous fraction extracted with EtOAc (5 × 50 mL), the combined organic fractions were washed with brine and solvent was removed *in vacuo*. The crude product was purified by chromatography, eluting with DCM to give the title compound (3.3 g, 80%) as a white solid: mp 114 – 116 °C (lit.<sup>9</sup> 110 – 111 °C).  $\delta_H$  (CDCl<sub>3</sub>) 7.83 (1H, d,  $J = 8.5$  Hz, 7-H), 7.04 (1H, dd,  $J = 8.5, 2.2$  Hz, 6-H), 6.92 (1H, d,  $J = 2.0$  Hz, 4-H), 5.25 (2H, s, CH<sub>2</sub>), 3.91 (3H, s, OCH<sub>3</sub>). These data are in good agreement with literature values.<sup>9</sup> LRMS (M+H) 165.2.

### 2-Formyl-4-methoxybenzoic acid (**31**)

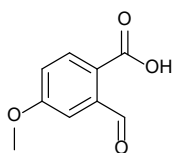

To benzofuranone **30** (7.7 g, 47 mmol) in chlorobenzene (100 mL) was added *N*-bromosuccinimide (9.2 g, 52 mmol) and azobisisobutyronitrile (0.77 g, 4.7 mmol), then the mixture was heated to 85 °C for 2 h. Water (100 mL) was added and the reaction heated to reflux for 18 h, then the mixture was cooled to room temperature and extracted with EtOAc (3 × 100 mL), dried (Na<sub>2</sub>SO<sub>4</sub>) and solvent was removed *in vacuo*. The crude product was dissolved in 2M NaOH (50 mL), stirred for 2 h then cooled to 0 °C, acidified and the resulting solid collected by filtration to give the title compound (5.3 g, 63%) as a yellow solid: mp 128 – 130 °C.  $\delta_{\text{H}}$  8.12 (1H, br s, CO<sub>2</sub>H), 7.74 (1H, d, *J* = 8.3 Hz, 6-H), 7.24 – 7.12 (2H, m, 3-H, 5-H), 6.57 (1H, br s, 2-CHO), 3.89 (3H, s, CH<sub>3</sub>).  $\delta_{\text{C}}$  168.0 (C=O), 164.5 (4-C), 150.3 (2-C), 126.2 (6-CH), 118.7 (1-C), 117.8 (5-CH), 107.7 (3-CH), 97.3 (CHO), 55.9 (CH<sub>3</sub>). LRMS (M+H) 181.2 (100%), (M-H) 179.1 (100%).

### Dimethyl (6-methoxy-3-oxo-1,3-dihydroisobenzofuran-1-yl)phosphonate (**24**)

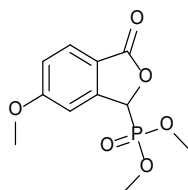

To acid **31** (6.0 g, 28 mmol) in THF (150 mL) was added dimethyl phosphite (2.9 mL, 31 mmol) dropwise followed by K<sub>2</sub>CO<sub>3</sub> (11.5 g, 83.3 mmol) portionwise and the resulting mixture was stirred for 18 h at room temperature, then cooled to 0 °C and methanesulfonic acid (6.4 mL, 97 mmol) was added dropwise. The resulting mixture was stirred for 2 h at room temperature, then solvent was removed *in vacuo*. The residue was partitioned between EtOAc (100 mL) and water (100 mL), the organic fraction was separated and the aqueous fraction extracted with EtOAc (2 × 100 mL). The combined organic fractions were dried (Na<sub>2</sub>SO<sub>4</sub>) and solvent was removed *in vacuo* to give the crude product which was purified by chromatography, eluting with 70% EtOAc/X4, to give the title compound (6.8 g, 89%) as a colourless semi-solid.  $\delta_{\text{H}}$  (CDCl<sub>3</sub>) 7.84 (1H, d, *J* = 8.5 Hz, 4-H), 7.19 (1H, br s, 3-H), 7.10 (1H, dt, *J* = 8.5, 1.5 Hz, 5-H), 5.64 (1H, d, *J* = 11.0 Hz, 1-H), 3.95 (3H, d, *J* = 10.9 Hz, POCH<sub>3</sub>), 3.93 (3H, s, OCH<sub>3</sub>), 3.62 (3H, d, *J* = 10.6 Hz, POCH<sub>3</sub>). These data are in good agreement with literature values.<sup>10</sup> LRMS (M+H) 273.1, (M-H) 271.1.

### 3-Benzylidene-5-methoxyisobenzofuran-1(3H)-one (**34**)

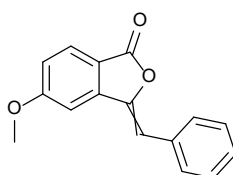

The reaction was carried out according to General Procedure D with phosphonate **24** (0.50 g, 1.8 mmol), LiHMDS (2.02 mL) and benzaldehyde (0.19 mL, 1.9 mmol). The crude product was purified by chromatography, eluting with 10% EtOAc/X4, to give the title product (0.46 g, quant.) as a colourless oil. Further chromatography prepared samples of the alkene isomers for analysis.

**E:**  $\delta_{\text{H}}$  (CDCl<sub>3</sub>) 7.81 (1H, d,  $J$  = 8.6 Hz, 7-H), 7.51 – 7.38 (5H, m, Ar-H), 7.03 (1H, dd,  $J$  = 8.5, 2.2 Hz, 6-H), 6.90 (1H, s, 3-C=CH), 6.86 (1H, d, 2.2 Hz, 4-H), 3.66 (3H, s, OCH<sub>3</sub>).  $\delta_{\text{C}}$  (CDCl<sub>3</sub>) 166.7 (C=O), 164.6 (5-C), 146.8 (3-C), 140.3 (3a-C), 133.4 (Ar-C), 129.5 (2 × Ar-CH), 129.0 (2 × Ar-CH), 128.7 (Ar-CH), 127.0 (7-CH), 119.0 (7a-C), 118.5 (6-CH), 112.8 (3-C=CH), 106.5 (4-CH), 55.7 (CH<sub>3</sub>). LRMS (M+H) 253.1.

**Z:**  $\delta_{\text{H}}$  (CDCl<sub>3</sub>) 7.87 – 7.82 (3H, m, 7-H, 2 × Ar-H), 7.44 – 7.39 (2H, m, 2 × Ar-H), 7.35 – 7.29 (1H, m, Ar-H), 7.16 (1H, d,  $J$  = 2.0 Hz, 4-H), 7.88 (1H, dd,  $J$  = 8.5, 2.1 Hz, 6-H), 6.39 (1H, s, 3-C=CH), 3.97 (3H, s, OCH<sub>3</sub>).  $\delta_{\text{C}}$  (CDCl<sub>3</sub>) 167.0 (C=O), 165.3 (5-C), 144.8 (3-C), 143.5 (3a-C), 133.2 (Ar-C), 130.3 (2 × Ar-CH), 129.0 (2 × Ar-CH), 128.6 (Ar-CH), 127.3 (7-CH), 118.5 (6-CH), 116.4 (7a-C), 107.0 (3-C=CH), 102.9 (4-CH), 56.2 (CH<sub>3</sub>). LRMS (M+H) 253.1. These data are in good agreement with literature values.<sup>1</sup>

### 3-Benzylidene-5-hydroxyisobenzofuran-1(3H)-one (**36**)

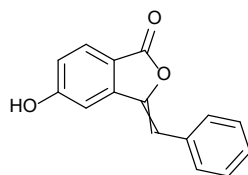

The reaction was carried out according to General Procedure E with benzofuranone **34** (0.20 g, 0.79 mmol) and BBr<sub>3</sub> (4.8 mL, 4.8 mmol). The crude product was purified by chromatography, eluting with 20% EtOAc/X4, to give the title product (0.13 g, 68%) as a yellow solid. Further chromatography prepared samples of the alkene isomers for analysis.

**E:**  $\delta_{\text{H}}$  10.82 (1H, br s, OH), 7.76 (1H, d,  $J$  = 8.4 Hz, 7-CH), 7.54 – 7.41 (5H, m, 2'-H, 3'-H, 4'-H, 5'-H, 6'-H), 7.00 (1H, dd,  $J$  = 8.4, 2.0 Hz, 6-CH), 6.95 (1H, s, 3-C=CH), 6.87 (1H, d,  $J$  = 1.9 Hz, 4-CH).  $\delta_{\text{C}}$  165.7 (1-C), 163.5 (5-C), 145.7 (3-C), 139.4 (3a-C), 132.7 (1'-C), 129.1 (2'-CH, 6'-CH), 128.8 (3'-CH, 5'-CH), 128.4 (4'-CH), 127.1 (7-CH), 119.4 (6-CH), 116.0 (7a-C), 112.4 (3-C=CH), 108.0 (4-CH).

**Z:**  $\delta_{\text{H}}$  10.97 (1H, br s, OH), 7.83 – 7.76 (3H, m, 7-H, 2'-H, 6'-H), 7.48 – 7.43 (2H, m, 3'-H, 5'-H), 7.37 – 7.33 (2H, m, 4-H, 4'-H), 7.05 (1H, dd,  $J$  = 8.4, 2.0 Hz, 6-CH), 6.81 (1H, s, 3-C=CH).  $\delta_{\text{C}}$  166.0 (1-C=O), 164.0 (5-C), 144.2 (3-C), 143.0 (3a-C), 133.3 (1'-C), 129.7 (2'-CH, 6'-CH), 128.8 (3'-CH, 5'-CH), 128.2 (4-CH), 127.2 (7-CH), 119.0 (6-CH), 113.4 (7a-C), 106.2 (3-C=CH), 105.9 (4'-CH).

LRMS (M+H) 239.1, (M-H) 237.2.



#### 4-Benzyl-6-hydroxyphthalazin-1(2H)-one (39)

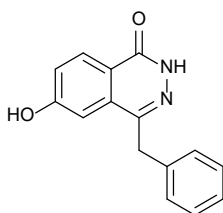

The reaction was carried out according to General Procedure B with benzofuranone **36** (50 mg, 0.21 mmol) and the crude product was triturated in water, then isolated by filtration to give the title product (53 mg, quant.) as a white solid: mp 218 – 221 °C.  $\delta_{\text{H}}$  12.30 (1H, s, NH), 10.69 (1H, br s, OH), 8.08 (1H, d,  $J = 8.7$  Hz, 8-H), 7.33 – 7.24 (4H, m, 2'-H, 3'-H, 5'-H, 6'-H), 7.23 – 7.16 (2H, m, 4'-H, 7-H), 7.08 (1H, d,  $J = 2.2$  Hz, 5-H), 4.18 (2H, s, 4-CCH<sub>2</sub>).  $\delta_{\text{C}}$  162.2 (6-C), 159.3 (1-C=O), 144.4 (4-C), 138.2 (1'-C), 131.4 (4a-C), 128.5 (2'-C, 6'-C), 128.42 (3'-C, 5'-C), 128.39 (8-CH), 126.4 (4'-CH), 120.7 (7-CH), 119.8 (8a-C), 109.4 (5-CH), 37.9 (CH<sub>2</sub>). HRMS calcd for C<sub>15</sub>H<sub>12</sub>N<sub>2</sub>O<sub>2</sub> (M+H)  $m/z$  253.9872, found 253.0971 (-0.1 ppm). LRMS (M+H) 253.2, (M-H) 251.1. HPLC purity 93.8%.

#### 3-Benzylidene-5-((1-methyl-2-nitro-1H-imidazol-5-yl)methoxy)isobenzofuran-1(3H)-one (42)

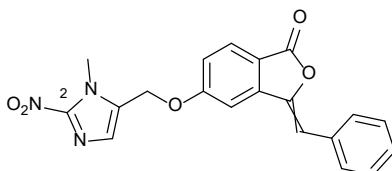

The reaction was carried out according to General Procedure C with benzofuranone **36** (50 mg, 0.21 mmol), K<sub>2</sub>CO<sub>3</sub> (90 mg, 0.63 mmol) and chloride **16** (40 mg, 0.23 mmol) stirring for 7 h at 50 °C. The crude product was collected by extraction and triturated with 1:1 EtOAc/X4 to give the title product (33.0 mg, 37%) as a yellow solid. Further chromatography prepared samples of the alkene isomers for analysis.

**E**:  $\delta_{\text{H}}$  7.93 (1H, d,  $J = 8.6$  Hz, 7-H), 7.59 – 7.52 (5H, m, 2'-H, 3'-H, 4'-H, 5'-H, 6'-H), 7.37 (1H, dd,  $J = 8.6, 2.2$  Hz, 6-H), 7.15 (1H, s, 4''-H), 7.06 (1H, s, 3-C=CH), 7.05 (1H, d,  $J = 2.1$  Hz, 4-CH), 5.25 (2H, s, OCH<sub>2</sub>), 3.88 (3H, s, NCH<sub>3</sub>).  $\delta_{\text{C}}$  165.4 (1-C=O), 162.4 (5-C), 146.3 (2''-C), 145.4 (3-C), 139.0 (3a-C), 132.5 (1'-C), 132.3 (5''-C), 129.2 (2'-CH, 6'-CH), 128.8 (3'-CH, 5'-CH), 128.7 (4'-CH, 4''-CH), 127.2 (7-CH), 118.8 (6-CH), 118.5 (7a-C), 113.3 (3-C=CH), 107.5 (4-CH), 59.6 (OCH<sub>2</sub>), 34.3 (NCH<sub>3</sub>). LRMS (M+H) 378.2, (M-C<sub>5</sub>H<sub>6</sub>N<sub>3</sub>O<sub>2</sub>) 237.1.

**Z**:  $\delta_{\text{H}}$  7.93 – 7.88 (2H, m, 7-H, 4'-H), 7.83 – 7.78 (2H, m, 2'-H, 6'-H), 7.52 – 7.46 (2H, m, 3'-H, 5'-H), 7.46 (1H, s, 4''-H), 7.40 – 7.34 (1H, m, 4-H), 7.30 (1H, dd,  $J = 8.6, 2.1$  Hz, 6-H), 6.96 (1H, s, 3-C=CH), 5.48 (2H, s, OCH<sub>2</sub>), 3.99 (3H, s, NCH<sub>3</sub>).  $\delta_{\text{C}}$  165.8 (1-C=O), 163.2 (5-C), 146.3 (2''-C), 144.0 (3-C), 142.8 (3a-C), 133.2 (1'-C), 132.6 (5''-C), 129.7 (2'-CH, 6'-CH), 129.0 (4-CH), 128.8 (3'-CH, 5'-CH), 128.4 (4''-CH), 127.0 (7-CH), 119.3 (6-CH), 115.6 (7a-C), 106.9 (3-C=CH), 105.1 (4'-CH), 59.5 (OCH<sub>2</sub>), 34.4 (NCH<sub>3</sub>). LRMS (M+H) 378.2, (M-C<sub>5</sub>H<sub>6</sub>N<sub>3</sub>O<sub>2</sub>) 237.1.

#### 4-Benzyl-6-((1-methyl-2-nitro-1*H*-imidazol-5-yl)methoxy)phthalazin-1(2*H*)-one (45)

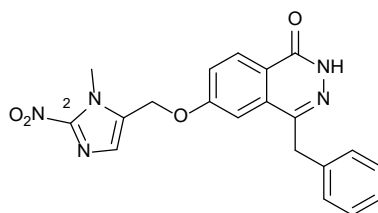

The reaction was carried out according to General Procedure B with benzofuranone **42** (32 mg, 0.085 mmol) to give the title product (25 mg, 76%) as a white solid: mp 232 – 235 °C.  $\delta_{\text{H}}$  12.47 (1H, s, NH), 8.21 (1H, d,  $J = 8.8$  Hz, 8-H), 7.51 (1H, dd,  $J = 8.8, 2.4$  Hz, 7-H), 7.47 (1H, d,  $J = 2.4$  Hz, 5-H), 7.35 – 7.28 (4H, m, Ar-H), 7.27 (1H, s, 4'-H), 7.23 – 7.17 (1H, m, Ar-H), 5.41 (2H, s, OCH<sub>2</sub>), 4.30 (2H, s, 4-CCH<sub>2</sub>), 3.94 (3H, s, CH<sub>3</sub>).  $\delta_{\text{C}}$  161.4 (6-C), 159.5 (C=O), 146.8 (2'-C), 145.3 (4-C), 138.6 (Ar-C), 133.2 (5'-C), 131.6 (4a-C), 129.2 (4'-CH), 129.1 (2 × Ar-CH), 129.0 (2 × Ar-CH), 128.9 (8-CH), 126.9 (Ar-CH), 122.5 (8a-C), 120.7 (7-C), 109.5 (5-CH), 60.1 (OCH<sub>2</sub>), 37.9 (4-CCH<sub>2</sub>), 34.8 (CH<sub>3</sub>). HRMS calcd for C<sub>20</sub>H<sub>18</sub>N<sub>5</sub>O<sub>4</sub> (M+H)  $m/z$  392.1353, found 392.1343 (-2.67 ppm). LRMS (M+H) 392.2. HPLC purity 99.8%.

#### 3-(3-(4-(Cyclopropanecarbonyl)piperazine-1-carbonyl)-4-fluorobenzylidene)-5-methoxyisobenzofuran-1(3*H*)-one (48)

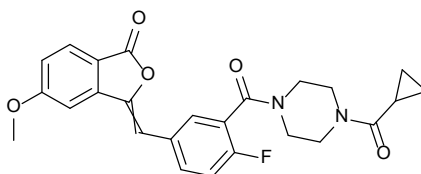

The reaction was carried out according to General Procedure D with phosphonate **24** (2.5 g, 9.2 mmol), LiHMDS (10.1 mL) and aldehyde **19** (2.8 g, 9.2 mmol). The crude product was purified by chromatography, eluting with a gradient (33% - 40%) of EtOAc/DCM, to give the title product (3.8 g, 92%) as a white foam. Further chromatography prepared samples of the alkene isomers for analysis.

**E:**  $\delta_{\text{H}}$  7.88 (1H, d,  $J = 8.6$  Hz, 7-H), 7.72 – 7.63 (2H, m, 2'-H, 6'-H), 7.47 (1H, t,  $J = 8.9$  Hz 5'-H), 7.24 (1H, dd,  $J = 8.6, 2.2$  Hz, 6-H), 7.01 (1H, s, 3-C=CH), 6.94 (1H, s, 4-H), 3.78 (3H, s, OCH<sub>3</sub>), 3.76 – 3.22 (8H, br m, 2''-CH<sub>2</sub>, 3''-CH<sub>2</sub>, 5''-CH<sub>2</sub>, 6''-CH<sub>2</sub>), 2.06 – 1.87 (1H, br m, 1'''-CH), 0.79 – 0.66 (4H, br m, 2'''-CH<sub>2</sub>, 3'''-CH<sub>2</sub>).  $\delta_{\text{C}}$  171.3 (4''-NC=O), 165.4 (1-C=O), 164.3 (5-C), 163.6 (1''-NC=O), 157.2 (4'-C, d,  $J_{\text{C-C-F}} = 248.2$  Hz), 146.1 (3-C), 139.1 (3a-C), 132.6 (6'-CH, d,  $J_{\text{C-C-C-F}} = 8.2$  Hz), 129.7 (2'-C, d,  $J_{\text{C-C-C-F}} = 4.2$  Hz), 129.5 (1'-C, d,  $J_{\text{C-C-C-C-F}} = 3.3$  Hz), 127.1 (7-CH), 124.5 (3'-C, d,  $J_{\text{C-C-F}} = 19.1$  Hz), 118.8 (6-CH), 117.8 (7a-C), 116.6 (5'-CH, d,  $J_{\text{C-C-F}} = 22.2$  Hz), 111.2 (3-C=CH), 106.1 (4-C), 55.8 (OCH<sub>3</sub>), 10.37 (1'''-CH), 7.11 (2 × CH<sub>2</sub>), 4 × NCH<sub>2</sub> not observed. LRMS (M+H) 451.2, (M-CH<sub>3</sub>) 435.1.

**Z:**  $\delta_{\text{H}}$  7.91 – 7.82 (3H, m, 7-H, 2'-H, 6'-H), 7.65 (1H, d,  $J = 2.0$  Hz, 4-H), 7.45 (1H, t,  $J = 9.0$  Hz, 5'-H), 7.24 – 7.18 (1H, m, 6-H), 7.00 (1H, s, 3-C=CH), 3.95 (3H, s, OCH<sub>3</sub>), 3.86 – 3.23 (8H, br m, 2''-CH<sub>2</sub>, 3''-CH<sub>2</sub>, 5''-CH<sub>2</sub>, 6''-CH<sub>2</sub>), 2.07 – 1.87 (1H, br m, 1'''-CH), 0.79 – 0.66 (4H, br m, 2'''-CH<sub>2</sub>, 3'''-CH<sub>2</sub>).  $\delta_{\text{C}}$  171.3 (4''-NC=O), 165.8 (1-C=O), 165.2 (5-C), 163.8 (1''-NC=O), 156.9 (4'-C, d,  $J_{\text{C-F}} = 248.9$  Hz), 144.4 (3-C), 142.8 (3a-C), 132.8 (6'-C, d,  $J_{\text{C-C-C-F}} = 8.3$  Hz), 130.4 (1'-C, d,  $J_{\text{C-C-C-C-F}} = 3.4$  Hz), 129.9 (2'-CH, d,  $J_{\text{C-C-C-F}} = 3.1$  Hz), 127.2 (7-CH), 126.9 (7-CH), 124.4 (3'-C, d,  $J_{\text{C-C-F}} = 18.8$  Hz), 119.0 (6-CH), 114.9 (7a-C),

104.8 (3-C=CH), 103.9 (4-CH), 56.3 (OCH<sub>3</sub>), 10.38 (1<sup>'''</sup>-CH), 7.13 (2 × CH<sub>2</sub>), 4 × NCH<sub>2</sub> not observed. LRMS (M+H) 451.2, (M-CH<sub>3</sub>) 435.1.

**3-(3-(4-(Cyclopropanecarbonyl)piperazine-1-carbonyl)-4-fluorobenzylidene)-5-hydroxyisobenzofuran-1(3H)-one (50)**

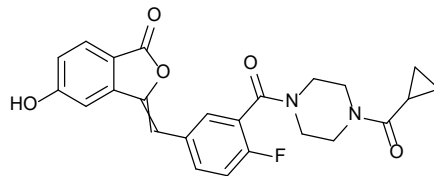

The reaction was carried out according to General Procedure E with benzofuranone **48** (0.20 g, 0.44 mmol) and BBr<sub>3</sub> (2.7 mL, 2.7 mmol). The crude product was purified by chromatography, eluting with 100% EtOAc to give the title product (0.14 g, 74%) as a white foam. Further chromatography prepared samples of the alkene isomers for analysis.

**E:** δ<sub>H</sub> 10.90 (1H, br s, OH), 7.77 (1H, d, *J* = 8.4 Hz, 7-H), 7.69 – 7.61 (1H, m, 6'-H), 7.60 – 7.50 (1H, m, 2'-H), 7.46 (1H, t, *J* = 9.1 Hz, 5'-H), 7.02 (1H, dd, *J* = 8.4, 2.0 Hz, 6-H), 6.93 (1H, s, 3-C=CH), 6.76 – 6.62 (1H, m, 4-H), 3.86 – 3.22 (8H, m, 2''-CH<sub>2</sub>, 3''-CH<sub>2</sub>, 4''-CH<sub>2</sub>, 5''-CH<sub>2</sub>), 2.05 – 1.82 (1H, m, 1<sup>'''</sup>-CH), 0.81 – 0.64 (4H, m, 2<sup>'''</sup>-CH<sub>2</sub>, 3<sup>'''</sup>-CH<sub>2</sub>). δ<sub>C</sub> 171.3 (4''-NC=O), 165.6 (1-C=O), 163.6 (1''-NC=O), 163.4 (5-C), 157.4 (4'-C, d, *J*<sub>C-F</sub> = 247.7 Hz), 146.3 (3-C), 139.4 (3a-C), 132.3 (6'-CH, d, *J*<sub>C-C-C-F</sub> = 7.9 Hz), 129.7 (1'-C, 2'-CH, m), 127.3 (7-CH), 124.5 (3'-C, *J*<sub>C-C-F</sub> = 18.9 Hz), 119.4 (6-CH), 116.6 (5'-CH, *J*<sub>C-C-F</sub> = 22.0 Hz), 11.6.0 (7a-C), 110.5 (3-C=CH), 108.1 (4-CH), 10.37 (1<sup>'''</sup>-CH), 7.10 (2 × CH<sub>2</sub>), 4 × NCH<sub>2</sub> not observed. LRMS (M+H) 437.2 (100%), (M-H) 435.1 (100%).

**Z:** δ<sub>H</sub> 11.05 (1H, br s, OH), 7.96 – 7.87 (1H, m, 6'-H), 7.84 (1H, dd, *J* = 6.5, 2.0 Hz, 2'-H), 7.78 (1H, d, *J* = 8.4 Hz, 7-H), 7.43 (1H, t, *J* = 9.0 Hz, 5'-H), 7.31 (1H, d, *J* = 1.8 Hz, 4-H), 7.06 (1H, dd, *J* = 8.4, 2.0 Hz, 6-CH), 6.85 (1H, s, 3-C=CH), 3.92 – 3.19 (8H, m, 2''-CH<sub>2</sub>, 3''-CH<sub>2</sub>, 4''-CH<sub>2</sub>, 5''-CH<sub>2</sub>), 2.10 – 1.84 (1H, m, 1<sup>'''</sup>-CH), 0.82 – 0.63 (4H, m, 2<sup>'''</sup>-CH<sub>2</sub>, 3<sup>'''</sup>-CH<sub>2</sub>). δ<sub>C</sub> 171.3 (4''-NC=O), 165.9 (1-C=O), 164.2 (5-C), 163.8 (1''-NC=O), 156.8 (5'-C, d, *J*<sub>C-F</sub> = 248.7 Hz), 144.5 (3-C), 142.8 (3a-C), 132.8 (6'-CH, d, *J*<sub>C-C-C-F</sub> = 8.2 Hz), 130.5 (1'-C, d, *J*<sub>C-C-C-C-F</sub> = 3.4 Hz), 129.9 (2'-CH, d, *J*<sub>C-C-C-F</sub> = 4.6 Hz), 127.3 (7-CH), 124.3 (3'-CH, d, *J*<sub>C-C-F</sub> = 18.7 Hz), 119.2 (6-CH), 116.6 (5'-CH, d, *J*<sub>C-C-F</sub> = 22.1 Hz), 113.3 (7a-C), 105.9 (4-CH), 104.3 (3-C=CH), 10.37 (1<sup>'''</sup>-CH), 7.13 (2 × CH<sub>2</sub>), 4 × NCH<sub>2</sub> not observed. LRMS (M+H) 437.2 (100%), (M-H) 435.1 (100%).

**(Z)-3-(3-(4-(Cyclopropanecarbonyl)piperazine-1-carbonyl)-4-fluorobenzylidene)-5-((1-methyl-2-nitro-1H-imidazol-5-yl)methoxy)isobenzofuran-1(3H)-one (53)**

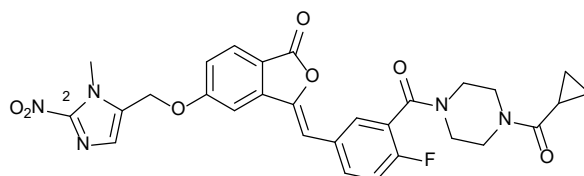

The reaction was carried out according to General Procedure C with benzofuranone **50** (90 mg, 0.21 mmol), K<sub>2</sub>CO<sub>3</sub> (44 mg, 0.32 mmol) and chloride **16** (40 mg, 0.23 mmol) stirring for 18 h at room

temperature. The crude product was collected by filtration and purified by chromatography, eluting with a gradient (1 – 2%) MeOH/DCM to give the title product (45 mg, 38%) as a tan foam.  $\delta_{\text{H}}$  7.97 – 7.80 (4H, m, 4-H, 7-H, 2'-H, 6'-H), 7.52 – 7.42 (2H, m, 6'-H, 4''-H), 7.33 (1H, dd,  $J = 8.5, 2.0$  Hz), 6.99 (1H, s, 3-C=CH), 5.47 (2H, s, OCH<sub>2</sub>), 3.99 (3H, s, NCH<sub>3</sub>), 3.89 – 3.22 (8H, m, 2''-CH<sub>2</sub>, 3''-CH<sub>2</sub>, 5''-CH<sub>2</sub>, 6''-CH<sub>2</sub>), 2.12 – 1.81 (1H, m, 1'''-CH), 0.83 – 0.63 (4H, 2'''-CH<sub>2</sub>, 3'''-CH<sub>2</sub>).  $\delta_{\text{C}}$  171.3 (4''-NC=O), 165.6 (5-C), 163.7 (1''-NC=O), 163.2 (1-C=O), 157.0 (4'-C, d,  $J_{\text{C-F}} = 249.0$  Hz), 146.4 (2'''-C), 144.4 (3-C), 142.6 (3a-C), 132.9 (6'-CH, d,  $J_{\text{C-C-C-F}} = 8.3$  Hz), 132.5 (5'''-C), 130.3 (1'-C, d,  $J_{\text{C-C-C-C-F}} = 3.3$  Hz), 129.9 (2'-CH, d,  $J_{\text{C-C-C-F}} = 3.4$  Hz), 128.9 (4'''-CH), 127.1 (7-CH), 124.4 (3'-C, d,  $J_{\text{C-C-F}} = 18.8$  Hz), 119.3 (6-CH), 116.7 (5'-CH, d,  $J_{\text{C-C-F}} = 22.0$  Hz), 115.6 (7a-C), 105.3 (4-CH), 105.0 (3-C=CH), 59.9 (OCH<sub>2</sub>), 34.4 (NCH<sub>3</sub>), 10.4 (1'''-CH), 7.13 (2'''-CH<sub>2</sub>, 3'''-CH<sub>2</sub>), , 4 × CH<sub>2</sub> not observed. LRMS (M+H) 576.1 (8%), (M-C<sub>5</sub>H<sub>6</sub>N<sub>3</sub>O<sub>2</sub>) 435.0 (80%).

**(E)-3-(3-(4-(Cyclopropanecarbonyl)piperazine-1-carbonyl)-4-fluorobenzylidene)-5-((1-methyl-5-nitro-1H-imidazol-2-yl)methoxy)isobenzofuran-1(3H)-one (55)**

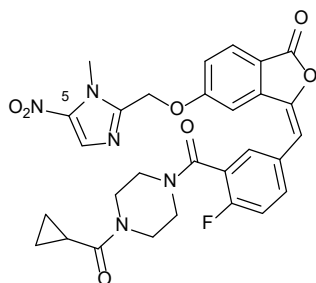

The reaction was carried out according to General Procedure C with benzofuranone **50** (90 mg, 0.21 mmol), K<sub>2</sub>CO<sub>3</sub> (44 mg, 0.32 mmol) and chloride **17** (40 mg, 0.23 mmol) stirring for 18 h at room temperature. The crude product was collected by filtration and purified by chromatography, eluting with a gradient (1 – 2%) of MeOH/DCM to give the title product (34 mg, 28%) as a yellow gum.  $\delta_{\text{H}}$  8.01 (1H, s, 4'''-H), 7.91 (1H, d,  $J = 8.6$  Hz, 7-CH), 7.71 – 7.63 (2H, m, 6'-CH, 2'-CH), 7.46 (1H, t,  $J = 9.3$  Hz, 5'-CH), 7.35 (1H, dd,  $J = 8.6, 2.1$  Hz, 6-CH), 7.17 (1H, d,  $J = 2.0$  Hz, 4-CH), 7.02 (1H, s, 3-C=CH), 5.36 (2H, s, OCH<sub>2</sub>), 3.89 (3H, s, NCH<sub>3</sub>), 3.88 – 3.26 (8H, m, 2''-CH<sub>2</sub>, 3''-CH<sub>2</sub>, 5''-CH<sub>2</sub>, 6''-CH<sub>2</sub>), 2.07 – 1.85 (1H, br m, 1'''-CH), 0.79 – 0.65 (4H, br m, 2'''-CH<sub>2</sub>, 3'''-CH<sub>2</sub>).  $\delta_{\text{C}}$  171.9 (4''-C=O), 165.8 (1-C=O), 164.2 (5-C), 162.9 (1''-C=O), 157.7 (4'-C, d,  $J_{\text{C-F}} = 248.5$  Hz), 147.3 (2'''-C), 146.4 (3-C), 140.1 (5'''-C), 139.3 (3a-C), 133.0 (6'-CH, d,  $J_{\text{C-C-C-F}} = 8.6$  Hz), 131.9 (4'''-CH), 130.3 (2'-CH, m), 129.9 (1'-C, d,  $J_{\text{C-C-C-C-F}} = 3.5$  Hz), 127.6 (7-CH), 124.8 (3'-C, d,  $J_{\text{C-C-F}} = 19.0$  Hz), 119.9 (6-CH), 119.0 (7a-C), 117.2 (5'-CH, d,  $J_{\text{C-C-F}} = 21.8$  Hz), 112.0 (3-C=CH), 107.9 (4-CH), 62.8 (OCH<sub>2</sub>), 34.0 (NCH<sub>3</sub>), 10.8 (1'''-CH), 7.60 (2'''-CH<sub>2</sub>, 3'''-CH<sub>2</sub>), 4 × CH<sub>2</sub> not observed. LRMS (M+H) 576.2 (20%), (M-C<sub>5</sub>H<sub>6</sub>N<sub>3</sub>O<sub>2</sub>) 435.2 (100%).

**6-Methoxyisobenzofuran-1(3H)-one (30)**

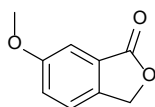

To 3-methoxybenzoic acid (10 g, 64 mmol) in AcOH (33 mL) was added conc. HCl (48 mL) and formaldehyde (19.2 mL) and the resulting mixture was stirred at 100 °C for 1 h. The reaction was cooled

to room temperature, neutralised with saturated NaHCO<sub>3</sub> and solvent was removed *in vacuo*. The crude residue was dissolved in boiling X4, residual solid filtered off and the mother liquor was evaporated to give the title compound (6.8 g, 64%) as a white solid: mp 97 – 100 °C (lit. 107.6 °C<sup>11</sup>). δ<sub>H</sub> 7.56 (1H, dd, *J* = 8.4, 0.6 Hz, 5-H), 7.35 (1H, dd, 8.4, 2.4 Hz, 4-H), 7.32 (1H, d, *J* = 2.3 Hz, 7-H), 5.34, (2H, s, CH<sub>2</sub>), 3.85 (3H, s, OCH<sub>3</sub>). These data are in good agreement with literature values.<sup>11</sup> LRMS (M+H) 165.2.

### 2-Formyl-5-methoxybenzoic acid (32)

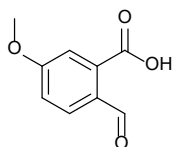

To benzofuranone **30** (8.6 g, 54 mmol) in chlorobenzene (170 mL) was added *N*-bromosuccinimide (9.8 g, 55 mmol) and the resulting mixture was heated to 85 °C. Azobisisobutyronitrile (0.086 g, 0.52 mmol) was suspended in chlorobenzene (10 mL) and 2 mL of this suspension was added to the reaction mixture, followed by the remainder after the resulting exotherm subsided. The mixture was stirred for 2 h at 85 °C, cooled to 0 °C and filtered to remove insoluble material, washing the filter cake with chlorobenzene (10 ml). The mother liquor was evaporated *in vacuo*, and the residue partitioned between 2 M NaOH (50 mL) and DCM (50 mL). The organic fraction was collected, and the aqueous fraction washed with DCM (2 × 50 mL). The aqueous residue was acidified with conc. HCl, extracted with EtOAc (3 × 50 mL) and solvent was removed *in vacuo*. The crude product was purified by chromatography, eluting with 50% EtOAc/X4, and the resulting solid recrystallised from EtOAc to give pure product (3.4 g, 36%) as a white solid: mp 131 – 133 °C (lit.<sup>11</sup> 166.2 °C). δ<sub>H</sub> 8.01 (1H, br s, OH), 7.61 (1H, t, *J* = 7.8 Hz, 4-H), 7.39 – 7.35 (2H, m, 3-H, 6-H), 6.66 (1H, s, CHO), 3.89 (3H, s, OCH<sub>3</sub>). These data are in good agreement with literature values.<sup>11</sup> LRMS (M-H) 179.2 (100%).

### Dimethyl (5-methoxy-3-oxo-1,3-dihydroisobenzofuran-1-yl)phosphonate (25)

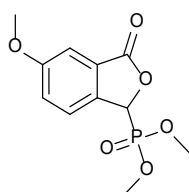

To acid **32** (3.3 g, 18mmol) in THF (100 mL) was added dimethyl phosphite (1.9 mL, 20 mmol), followed by K<sub>2</sub>CO<sub>3</sub> (3.8 g, 28 mmol) portionwise and the resulting mixture was stirred at room temperature for 48 h. A further portion of K<sub>2</sub>CO<sub>3</sub> (2.5 g, 18 mmol) was added and the mixture stirred a further 24 hours, cooled to 0 °C and methanesulfonic acid (3.9 mL, 60 mmol) was added. The mixture was stirred for 1 h at room temperature, then solvent was removed *in vacuo*. The residue was partitioned between EtOAc (100 mL) and water (100 mL), the organic layer was separated, and the aqueous residue was extracted with EtOAc (6 × 200 mL). The organic fractions were combined, dried (Na<sub>2</sub>SO<sub>4</sub>) and solvent was removed *in vacuo*. The crude product was purified by chromatography, eluting with 70% EtOAc/X4 to give the title compound (2.3 g, 46%) as a yellow oil that solidified on standing: mp 75 – 77 °C. δ<sub>H</sub>(CDCl<sub>3</sub>)

7.64 (1H, dt,  $J = 8.5, 0.8$  Hz, 7-H), 7.37 (1H, d,  $J = 2.4$  Hz, 4-H), 7.29 (1H, dd,  $J = 8.5, 2.4$  Hz, 6-H), 5.66 (1H, dd,  $J = 9.9, 0.6$  Hz, 1-CH), 3.92 (3H, d,  $J = 10.9$  Hz, P(OCH<sub>3</sub>)) 3.89 (3H, OCH<sub>3</sub>), 3.61 (3H, d,  $J = 10.6$  Hz, P(OCH<sub>3</sub>)).  $\delta_C$  (CDCl<sub>3</sub>) 169.9 (3-C=O,  $J_{C-O-P} = 2.3$  Hz), 161.5 (5-C,  $J_{C-C-C-C-P} = 2.2$  Hz), 135.9 (7a-C,  $J_{C-C-P} = 4.4$  Hz), 126.8 (3a-C,  $J_{C-C-C-P} = 4.6$  Hz), 124.6 (7-CH,  $J_{C-C-C-P} = 2.6$  Hz), 123.7 (6-CH,  $J_{C-C-C-C-P} = 2.8$  Hz), 108.1 (4-CH,  $J_{C-C-C-C-P} = 1.3$  Hz), 75.2 (1-CH,  $J_{C-P} = 166.2$  Hz), 56.1 (5-COCH<sub>3</sub>), 54.8 (POCH<sub>3</sub>,  $J_{C-O-P} = 6.9$  Hz), 54.4 (POCH<sub>3</sub>,  $J_{C-O-P} = 7.2$  Hz). LRMS (M+H) 273.1 (100%), (M-H) 271.1 (100%).

### 3-Benzylidene-6-methoxyisobenzofuran-1(3H)-one (35)

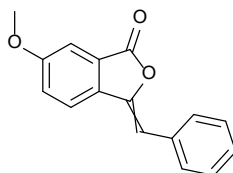

The reaction was carried out according to General Procedure D with phosphonate **25** (0.50 g, 1.8 mmol), LiHMDS (2.0 mL) and benzaldehyde (0.19 mL, 1.9 mmol). The crude product was purified by chromatography, eluting with 10% EtOAc/X4 to give the title product (0.45 g, 98%) as a white solid. Further chromatography prepared samples of the alkene isomers for analysis.

**E**:  $\delta_H$  7.55 – 7.39 (7H, m, 4-H, 7-H, 4 × Ar-H), 7.28 (1H, dd,  $J = 8.7, 2.5$  Hz, 5-H), 6.92 (1H, s, 3-C=CH), 3.87 (3H, s, OCH<sub>3</sub>).  $\delta_C$  165.8 (C=O), 161.4 (6-C), 145.7 (3-C), 132.8 (Ar-C), 129.7 (3a-C), 129.1 (2 × Ar-CH), 128.9 (2 × Ar-CH), 128.3 (Ar-CH), 127.2 (7a-C), 123.7 (4-CH), 123.3 (5-CH), 110.8 (3-C=CH), 107.5 (7-CH), 56.0 (OCH<sub>3</sub>). LRMS (M+H) 253.1.

**Z**:  $\delta_H$  8.03 (1H, d,  $J = 8.6$  Hz 4-H), 7.80 – 7.75 (2H, m, 2 × Ar-H), 7.49 – 7.40 (4H, m, 7-H, 4-H, 2 × Ar-H), 7.33 (1H, dddd,  $J = 7.4, 6.8, 1.2, 1.2$  Hz, Ar-H), 6.80 (1H, s, 3-C=CH), 3.90 (3H, s, OCH<sub>3</sub>).  $\delta_C$  166.3 (C=O), 161.2 (6-C), 144.2 (3-C), 133.5 (Ar-C), 133.0 (3a-C), 129.5 (2 × Ar-CH), 128.8 (2 × Ar-CH), 128.0 (Ar-CH), 124.1 (7a-C), 124.0 (5-CH), 122.2 (4-CH), 107.1 (7-CH), 105.3 (3-C=CH), 56.0 (OCH<sub>3</sub>). LRMS (M+H) 253.1.

### (Z)-3-Benzylidene-6-hydroxyisobenzofuran-1(3H)-one (37)

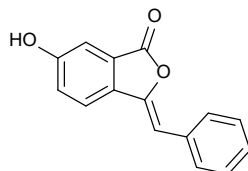

The reaction was carried out according to General Procedure E with benzofuranone **35** (0.38 g, 1.5 mmol) and BBr<sub>3</sub> (9.0 mL, 9.0 mmol). The crude product was purified by chromatography, eluting with 50% EtOAc/X4, to give the title product (0.35 g, 97%) as a yellow solid: mp 205 – 208 °C.  $\delta_H$  (CDCl<sub>3</sub>) 7.83 – 7.80 (2H, m, Ar-H), 7.67 (1H, d,  $J = 8.4$  Hz, 4-H), 7.43 – 7.38 (2H, m, Ar-H), 7.34 – 7.27 (2H, m, Ar-H), 7.26 – 7.23 (1H, dd,  $J = 8.5, 2.3$  Hz, 5-H), 6.70 (1H, s, 3-C=CH), 5.84 (1H, br s, OH).  $\delta_H$  10.54 (1H, br s, OH), 7.94 (1H, dd,  $J = 8.5, 0.4$  Hz, 4-H), 7.76 (2H, dd,  $J = 8.3, 1.0$  Hz, 2'-H, 6'-H), 7.47 – 7.42 (2H, m, 3'-H, 5'-H), 7.34 – 7.30 (1H, m, 4'-H), 7.28 (1H, dd,  $J = 8.5, 2.2$  Hz, 5-H), 7.18 (1H, dd,  $J = 2.2,$

0.4 Hz, 7-H). 6.70 (1H, s, 3-C=CH).  $\delta_c$  166.4 (1-C=O), 159.7 (7a-C), 144.5 (3-C), 133.6 (1'-C), 131.4 (3a-C), 129.6 (2'-CH, 6'-CH), 128.8 (3'-CH, 5'-CH), 127.7 (4'-CH), 124.6 (6-C), 123.8 (5-CH), 122.4 (4-CH), 109.4 (7-CH), 104.3 (3-C=CH). LRMS (M+H) 239.2, (M-H) 237.1.

#### 4-Benzyl-7-hydroxyphthalazin-1(2H)-one (40)

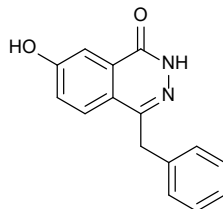

The reaction was carried out according to General Procedure B with benzofuranone **33** (50 mg, 0.21 mmol) and the crude product was triturated in water, then isolated by filtration to give the title product (47 mg, 89%) as a white solid: mp 303 – 306 °C.  $\delta_H$  12.34 (1H, s, NH), 10.69 (1H, br s, OH), 7.79 (1H, d,  $J$  = 8.9 Hz, 5-H), 7.51 (1H, d,  $J$  = 2.6 Hz, 8-H), 7.31 – 7.26 (4H, m, Ar-H), 7.24 (1H, dd,  $J$  = 8.8, 2.6 Hz, 6-H), 7.21 – 7.15 (1H, m, Ar-H), 4.20 (2H, s, CH<sub>2</sub>).  $\delta_c$  160.2 (7-C), 159.3 (C=O), 145.0 (4-C), 138.5 (Ar-C), 130.0 (8a-C), 128.5 (4 × Ar-CH), 128.0 (5-CH), 126.3 (Ar-CH), 122.4 (6-CH), 121.8 (4a-CH), 109.6 (8-CH), 37.6 (CH<sub>2</sub>). HRMS calcd for C<sub>15</sub>H<sub>13</sub>N<sub>2</sub>O<sub>2</sub> (M+H)  $m/z$  253.0972, found 253.0964 (-3.10 ppm). HPLC purity 97.9%

#### (Z)-3-Benzylidene-6-((1-methyl-2-nitro-1H-imidazol-5-yl)methoxy)isobenzofuran-1(3H)-one (43)

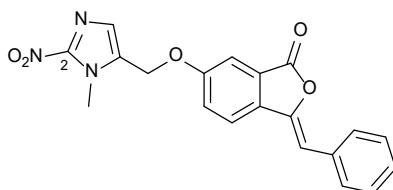

The reaction was carried out according to General Procedure C with benzofuranone **33** (50 mg, 0.21 mmol), K<sub>2</sub>CO<sub>3</sub> (90 mg, 0.63 mmol) and chloride **16** (40 mg, 0.23 mmol) stirring for 7 h at 50 °C. The crude product was collected by filtration and triturated with EtOAc to give the title product (40 mg, 44%) as a yellow solid: mp 266 – 269 °C.  $\delta_H$  8.08 (1H, d,  $J$  = 8.6 Hz, 4-H), 7.79 (2H, d,  $J$  = 7.6 Hz, Ar-H), 7.67 (1H, d,  $J$  = 2.2 Hz, 7-H), 7.57 (1H, dd,  $J$  = 8.6, 2.2 Hz, 5-H), 7.47 (2H, t,  $J$  = 7.6 Hz, Ar-H), 7.37 (1H, s, 4'-H), 7.34 (1H, t,  $J$  = 7.3 Hz, Ar-H), 6.84 (1H, s, 3-C=CH), 5.44 (2H, s, CH<sub>2</sub>), 3.97 (3H, s, CH<sub>3</sub>).  $\delta_c$  166.2 (C=O), 159.3 (6-C), 146.3 (2'-CH), 144.1 (3-C), 133.8 (3a-C), 133.4 (Ar-C), 132.9 (5'-C), 129.5 (2 × Ar-CH), 128.9 (2 × Ar-CH), 128.6 (4'-CH), 128.1 (Ar-CH), 124.6 (5-CH), 124.0 (7a-C), 122.4 (4-CH), 108.7 (7-CH), 105.7 (3-C=CH), 60.0 (OCH<sub>2</sub>), 34.4 (NCH<sub>3</sub>). LRMS (M+H) 378.2.

#### 4-Benzyl-7-((1-methyl-2-nitro-1H-imidazol-5-yl)methoxy)phthalazin-1(2H)-one (46)

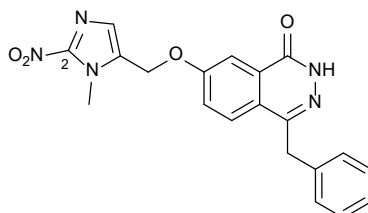

The reaction was carried out according to General Procedure B with benzofuranone **43** (38 mg, 0.10 mmol) to give the title product (26 mg, 67%) as a white solid: mp 227 – 230 °C.  $\delta_{\text{H}}$  12.55 (1H, s, NH), 7.90 (1H, d,  $J$  = 9.0 Hz, 5-H), 7.84 (1H, d,  $J$  = 2.8 Hz, 8-H), 7.51 (1H, dd,  $J$  = 9.0, 2.8 Hz, 6-H), 7.35 (1H, s, 4'-H), 7.32 – 7.25 (4H, m, Ar-H), 7.22 – 7.16 (1H, m, Ar-H), 5.46 (2H, s, OCH<sub>2</sub>), 4.27 (2H, CH<sub>2</sub>Ph), 3.94 (3H, s, CH<sub>3</sub>).  $\delta_{\text{C}}$  160.0 (7-C), 159.7 (C=O), 146.8 (2'-C), 145.4 (4-C), 138.8 (Ar-C), 133.4 (5'-C), 130.4 (8a-C), 129.2 (4'-CH), 129.0 (2 × Ar-CH), 128.9 (2 × Ar-CH), 128.5 (5-CH), 126.9 (Ar-CH), 124.2 (4a-C), 123.2 (6-CH), 108.8 (8-CH), 60.1 (OCH<sub>2</sub>), 38.1 (4-CCH<sub>2</sub>), 34.8 (CH<sub>3</sub>). HRMS calcd for C<sub>20</sub>H<sub>18</sub>N<sub>5</sub>O<sub>4</sub> (M+H)  $m/z$  392.1353, found 392.1342 (-3.00 ppm). HPLC purity 98.4%

**3-(3-(4-(Cyclopropanecarbonyl)piperazine-1-carbonyl)-4-fluorobenzylidene)-6-methoxyisobenzofuran-1(3H)-one (49)**

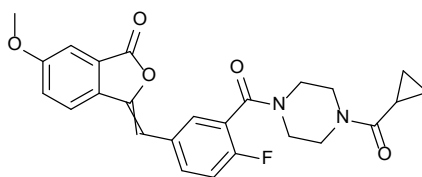

The reaction was carried out according to General Procedure D with phosphonate **25** (0.40 g, 1.5 mmol), LiHMDS (1.62 mL) and aldehyde **19** (0.45 g, 1.5 mmol). The crude product was purified by chromatography, eluting with 70% EtOAc/X4 to give the title product (0.60 g, 91%) as a white foam. Further chromatography prepared samples of the alkene isomers for analysis.

**E:**  $\delta_{\text{H}}$  7.69 – 7.63 (1H, m, 6'-H), 7.60 – 7.55 (1H, m, 2'-H), 7.49 – 7.37 (3H, m, 5'-H, 5-H, 7-H), 7.30 (1H, d,  $J$  = 7.2 Hz, 4-H), 6.89 (1H, s, 3-C=CH), 3.88 (3H, s, OCH<sub>3</sub>), 3.81 – 3.27 (8H, br m, 2''-CH<sub>2</sub>, 3''-CH<sub>2</sub>, 5''-CH<sub>2</sub>, 6''-CH<sub>2</sub>), 2.05 – 1.89 (1H, br m, 1'''-CH), 0.78 – 0.67 (4H, m, 2'''-CH<sub>2</sub>, 3'''-CH<sub>2</sub>).  $\delta_{\text{C}}$  171.3 (4''-NC=O), 165.7 (1-C=O), 163.6 (1'''-NC=O), 161.6 (6-C), 157.3 (4'-C, d,  $J$  = 247.8), 146.3 (3-C), 132.3 (6'-CH, d,  $J$  = 8.3 Hz), 129.9 (1'-C, d,  $J$  = 3.5 Hz), 129.7 (2'-CH, d,  $J$  = 4.2 Hz), 129.4 (3a-C), 127.3 (7a-C), 124.5 (3'-C, d,  $J$  = 19.4 Hz), 123.8 (5-CH), 123.3 (4-CH), 116.7 (5'-CH, d,  $J$  = 22.5 Hz), 109.0 (3-C=CH), 107.6 (7-CH), 56.1 (OCH<sub>3</sub>), 10.4 (1'''-CH), 7.2 (2 × CH<sub>2</sub>), 4 × NCH<sub>2</sub> not observed. LRMS (M+H) 451.2 (100%)

**Z:**  $\delta_{\text{H}}$  7.99 (1H, d,  $J$  = 8.4 Hz, 4-H), 7.90 – 7.84 (1H, m, 6'-H), 7.81 (1H, dd,  $J$  = 6.5, 1.9 Hz, 2'-H), 7.48 (1H, dd,  $J$  = 8.5, 2.4 Hz, 5-H), 7.46 – 7.39 (2H, m, 5'-H, 7-H), 6.84 (1H, s, 3-C=CH), 3.91 (3H, s, OCH<sub>3</sub>), 3.86 – 3.22 (8H, br m, 2''-CH<sub>2</sub>, 3''-CH<sub>2</sub>, 5''-CH<sub>2</sub>, 6''-CH<sub>2</sub>), 2.09 – 1.85 (1H, br m, 1'''-CH), 0.82 – 0.67 (4H, m, 2'''-CH<sub>2</sub>, 3'''-CH<sub>2</sub>).  $\delta_{\text{C}}$  171.3 (4''-NC=O), 166.1 (1-C=O), 163.8 (1'''-NC=O), 161.4 (6-C), 156.8 (4'-C, d,  $J$  = 248.3 Hz), 144.5 (3-C), 132.8 (3a-C), 132.5 (6'-CH, d,  $J$  = 8.2 Hz), 130.7 (1'-C, d,  $J$  = 3.5 Hz), 129.7 (2'-CH, d,  $J$  = 2.9 Hz), 124.3 (3'-C, d,  $J$  = 18.9 Hz), 124.2 (7a-C), 124.1 (5-CH), 122.2 (4-CH), 116.6 (5'-CH, d,  $J$  = 23.3 Hz), 107.3 (7-CH), 103.3 (3-C=CH), 56.1 (OCH<sub>3</sub>), 10.4 (1'''-CH), 7.1 (2 × CH<sub>2</sub>), 4 × NCH<sub>2</sub> not observed. LRMS (M+H) 451.2 (100%)



**3-(3-(4-(Cyclopropanecarbonyl)piperazine-1-carbonyl)-4-fluorobenzylidene)-6-hydroxyisobenzofuran-1(3H)-one (51)**

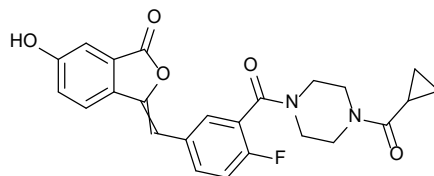

The reaction was carried out according to General Procedure E with benzofuranone **49** (0.20 g, 0.44 mmol) and  $\text{BBr}_3$  (2.66 mL, 2.66 mmol). The crude product was purified by chromatography, eluting with 100% EtOAc to give the title product (0.14 g, 74%) as a yellow foam. Further chromatography prepared samples of the alkene isomers for analysis.

**E:**  $\delta_{\text{H}}$  10.67 (1H, s, OH), 7.72 – 7.66 (1H, m, 6'-H), 7.64 – 7.56 (1H, m, 2'-H), 7.48 (1H, t,  $J = 9.0$  Hz, 5'-H), 7.40 (1H, d,  $J = 8.35$  Hz, 4-H), 7.22 (1H, d,  $J = 2.2$  Hz, 7-H), 7.16 (1H, d,  $J = 7.6$  Hz, 5-H), 6.86 (1H, s, 3-C=CH), 3.86 – 3.30 (8H, br m, 2''-CH<sub>2</sub>, 3''-CH<sub>2</sub>, 5''-CH<sub>2</sub>, 6''-CH<sub>2</sub>), 2.10 – 1.91 (1H, br m, 1'''-CH), 0.82 – 0.71 (4H, m, 2'''-CH<sub>2</sub>, 3'''-CH<sub>2</sub>).  $\delta_{\text{C}}$  171.3 (4''-NC=O), 165.9 (1-C=O), 163.6 (1''-NC=O), 160.1 (6-C), 157.1 (4'-CH, d,  $J_{\text{C-F}} = 247.1$  Hz), 146.5 (3-C), 132.2 (6'-CH, d,  $J_{\text{C-C-F}} = 8.5$  Hz), 130.0 (1'-C, d,  $J_{\text{C-C-C-F}} = 3.1$  Hz), 129.6 (2'-CH, d,  $J_{\text{C-C-C-F}} = 3.5$  Hz), 127.8 (3a-C), 127.3 (7a-C), 124.5 (3'-C, d,  $J_{\text{C-C-F}} = 19.2$  Hz), 124.1 (4-CH), 123.2 (5-CH), 116.6 (5'-CH, d,  $J_{\text{C-C-F}} = 22.1$  Hz), 109.8 (7-CH), 108.0 (3-C=CH), 10.38 (1'''-CH), 7.12 (2 × CH<sub>2</sub>), 4 × NCH<sub>2</sub> not observed. LRMS (M+H) 437.2 (100%), (M-H) 435.1 (100%).

**Z:**  $\delta_{\text{H}}$  10.60 (1H, s, OH), 7.91 (1H, d,  $J = 8.5$  Hz, 4-H), 7.89 – 7.83 (1H, m, 6'-H), 7.82 – 7.77 (1H, m, 2'-H), 7.42 (1H, t,  $J = 9.1$  Hz, 5'-H), 7.30 (1H, dd,  $J = 8.5, 2.2$  Hz, 5-H), 7.20 (1H, d,  $J = 2.2$  Hz, 7-H), 6.76 (1H, s, 3-C=CH), 3.86 – 3.24 (8H, br m, 2''-CH<sub>2</sub>, 3''-CH<sub>2</sub>, 5''-CH<sub>2</sub>, 6''-CH<sub>2</sub>), 2.11 – 1.88 (1H, br m, 1'''-CH), 0.82 – 0.67 (4H, br m, 2'''-CH<sub>2</sub>, 3'''-CH<sub>2</sub>).  $\delta_{\text{C}}$  171.3 (4''-NC=O), 166.2 (1-C=O), 163.9 (1''-NC=O), 159.9 (6-C), 156.7 (4'-C, d,  $J_{\text{C-F}} = 249.5$  Hz), 144.8 (3-C), 132.4 (6'-CH, d,  $J_{\text{C-C-C-F}} = 8.2$  Hz), 131.1 (3a-C), 130.8 (1'-C, d,  $J_{\text{C-C-C-C-F}} = 3.2$  Hz), 129.5 (2'-CH, d,  $J_{\text{C-C-C-F}} = 3.2$  Hz), 124.3 (3'-C, d,  $J_{\text{C-C-F}} = 18.1$  Hz), 124.2 (7a-C), 123.9 (5-CH), 122.4 (4-CH), 116.6 (5'-CH, d,  $J_{\text{C-C-F}} = 21.8$  Hz), 109.5 (7-CH), 102.4 (3-C=CH), 10.37 (1'''-CH), 7.14 (2 × CH<sub>2</sub>), 4 × NCH<sub>2</sub> not observed. LRMS (M+H) 437.2 (100%), (M-H) 435.1 (100%).

**(Z)-3-(3-(4-(Cyclopropanecarbonyl)piperazine-1-carbonyl)-4-fluorobenzylidene)-6-((1-methyl-2-nitro-1H-imidazol-5-yl)methoxy)isobenzofuran-1(3H)-one (54)**

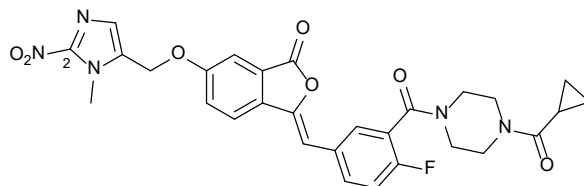

The reaction was carried out according to General Procedure C with benzofuranone **51** (90 mg, 0.21 mmol),  $\text{K}_2\text{CO}_3$  (44 mg, 0.32 mmol) and chloride **16** (40 mg, 0.23 mmol) stirring for 18 h at room temperature. The crude product was collected by filtration and triturated with MeOH to give the title product (60 mg, 50%) as a cream solid: mp 234 - 237 °C.

$\delta_{\text{H}}$  8.04 (1H, d,  $J = 8.6$  Hz, 5-H), 7.91 – 7.85 (1H, m, 6'-H), 7.85 – 7.80 (1H, m, 2'-H), 7.68 (1H, d,  $J = 2.2$  Hz, 7-H), 7.58 (1H, dd,  $J = 8.6, 2.3$  Hz, 5-H), 7.44 (1H, d,  $J = 9.0$  Hz, 5'-H), 7.37 (1H, s, 4'''-H), 6.88 (1H, s, 3-C=CH), 5.44 (2H, s, OCH<sub>2</sub>), 3.97 (3H, s, NCH<sub>3</sub>), 3.87 – 3.24 (8H, br m, 2''-CH<sub>2</sub>, 3''-CH<sub>2</sub>, 5''-CH<sub>2</sub>, 6''-CH<sub>2</sub>), 2.09 – 1.86 (1H, br m, 1'''-CH), 0.81 – 0.67 (4H, br m, 2'''-CH<sub>2</sub>, 3'''-CH<sub>2</sub>).  $\delta_{\text{C}}$  171.3 (4''-NC=O), 166.0 (1''-NC=O), 163.8 (1-C=O), 159.5 (6-C), 156.8 (4'-C, d,  $J_{\text{C-F}} = 248.6$  Hz), 146.3 (2'''-C), 144.4 (3-C), 133.5 (3a-C), 132.9 (5'''-C), 132.6 (6'-CH, d,  $J_{\text{C-C-C-F}} = 7.9$  Hz), 130.6 (1'-C, d,  $J_{\text{C-C-C-C-F}} = 3.4$  Hz), 129.7 (2'-CH, d,  $J_{\text{C-C-C-F}} = 2.3$  Hz), 128.6 (4'''-CH), 124.7 (5-CH), 124.3 (3'-C, d,  $J_{\text{C-C-F}} = 18.7$  Hz), 124.1 (7a-C), 122.4 (4-CH), 116.3 (5'-CH, d,  $J_{\text{C-C-F}} = 22.3$  Hz), 108.9 (7-CH), 103.7 (3-C=CH), 60.0 (OCH<sub>2</sub>), 34.4 (NCH<sub>3</sub>), 10.37 (1'''-CH), 7.13 (2 × CH<sub>2</sub>), 4 × NCH<sub>2</sub> not observed. LRMS (M+H) 576.2 (24%), (M-C<sub>5</sub>H<sub>6</sub>N<sub>3</sub>O<sub>2</sub>) 435.2 (100%)

**3-(3-(4-(Cyclopropanecarbonyl)piperazine-1-carbonyl)-4-fluorobenzylidene)-6-((1-methyl-5-nitro-1H-imidazol-2-yl)methoxy)isobenzofuran-1(3H)-one (56)**

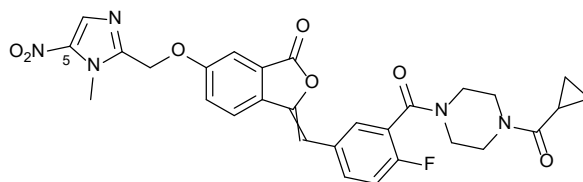

The reaction was carried out according to General Procedure C with benzofuranone **51** (90 mg, 0.21 mmol), K<sub>2</sub>CO<sub>3</sub> (44 mg, 0.32 mmol) and chloride **17** (40 mg, 0.23 mmol) stirring for 18 h at room temperature. The crude product was collected by filtration and triturated with MeOH to give the title product (50 mg, 42%) as a white foam. Further chromatography prepared samples of the alkene isomers for analysis

**E:**  $\delta_{\text{H}}$  8.09 (1H, s, 4'''-H), 7.71 – 7.63 (2H, m, 7-H, 6'-H), 7.61 – 7.53 (1H, m, 5-H), 7.45 (1H, t,  $J = 9.1$  Hz, 5'-H), 7.42 – 7.37 (2H, m, 4-H, 2'-H), 6.93 (1H, s, 3-C=CH), 5.48 (2H, s, OCH<sub>2</sub>), 3.93 (3H, s, NCH<sub>3</sub>), 3.84 – 3.39 (8H, br m, 2''-CH<sub>2</sub>, 3''-CH<sub>2</sub>, 5''-CH<sub>2</sub>, 6''-CH<sub>2</sub>), 2.05 – 1.87 (1H, br m, 1'''-H), 0.79 – 0.66 (4H, br m, 2'''-CH<sub>2</sub>, 3'''-CH<sub>2</sub>).  $\delta_{\text{C}}$  171.3 (4''-NC=O), 165.6 (1-C=O), 163.6 (1''-NC=O), 159.7 (6-C), 157.2 (4'-C, d,  $J_{\text{C-F}} = 248.0$  Hz), 147.2 (2'''-C), 146.1 (3-C), 139.7 (5'''-C), 132.3 (6'-CH, d,  $J_{\text{C-C-C-F}} = 8.2$  Hz), 131.5 (4'''-CH), 130.3 (3a-C), 129.8 (1'-C, d,  $J_{\text{C-C-C-C-F}} = 3.2$  Hz), 129.7 (5-CH), 127.1 (7a-C), 124.5 (3'-C, d,  $J_{\text{C-C-F}} = 18.1$  Hz), 124.0 (4-CH), 123.9 (2'-C, d,  $J_{\text{C-C-C-F}} = 6.6$  Hz), 116.7 (5'-C, d,  $J_{\text{C-C-F}} = 23.0$  Hz), 109.5 (3-C=CH), 109.2 (7-CH), 62.6 (OCH<sub>2</sub>), 33.6 (NCH<sub>3</sub>), 10.4 (1'''-CH), 7.12 (2 × CH<sub>2</sub>), 4 × NCH<sub>2</sub> not observed. LRMS (M-C<sub>5</sub>H<sub>6</sub>N<sub>3</sub>O<sub>2</sub>) 435.1 (100%).

**Z:**  $\delta_{\text{H}}$  8.11 (1H, s, 4'''-H), 8.03 (1H, d,  $J = 8.6$  Hz, 4-H), 7.91 – 7.85 (1H, m, 6'-H), 7.82 (1H, dd,  $J = 6.4, 1.8$  Hz, 2'-H), 7.69 (1H, d,  $J = 2.3$  Hz, 7-H), 7.56 (1H, dd,  $J = 8.6, 2.4$  Hz, 5-H), 7.44 (1H, t,  $J = 9.1$  Hz, 5'-H), 6.88 (1H, s, 3-C=CH), 5.49 (2H, s, OCH<sub>2</sub>), 3.97 (3H, s, NCH<sub>3</sub>), 3.86 – 3.24 (8H, br m, 2''-CH<sub>2</sub>, 3''-CH<sub>2</sub>, 5''-CH<sub>2</sub>, 6''-CH<sub>2</sub>), 2.08 – 1.86 (1H, br m, 1'''-H), 0.79 – 0.67 (4H, br m, 2'''-CH<sub>2</sub>, 3'''-CH<sub>2</sub>).  $\delta_{\text{C}}$  171.3 (4''-NC=O), 166.0 (1-C), 163.8 (1''-NC=O), 159.5 (6-C), 156.8 (4'-C, d,  $J_{\text{C-F}} = 248.6$  Hz), 147.2 (2'''-C), 144.4 (3-C), 139.7 (5'''-C), 133.6 (3a-C), 132.6 (6'-C, d,  $J_{\text{C-C-C-F}} = 8.5$  Hz), 131.5 (4'''-CH), 130.5 (1'-C, d,  $J_{\text{C-C-C-C-F}} = 2.9$  Hz), 129.7 (2'-C, d,  $J_{\text{C-C-C-F}} = 3.7$  Hz), 127.1 (7a-C), 124.6 (5-CH), 124.3 (3'-C, d,  $J_{\text{C-C-F}} = 19.4$  Hz), 122.3 (4-CH), 116.6 (5'-CH, d,  $J_{\text{C-C-F}} = 22.1$  Hz), 108.9 (7-CH), 103.7 (3-C=CH), 62.7

(OCH<sub>2</sub>), 33.6 (NCH<sub>3</sub>), 10.4 (1<sup>m</sup>-CH), 7.13 (2 × CH<sub>2</sub>), 4 × NCH<sub>2</sub> not observed. LRMS (M-C<sub>5</sub>H<sub>6</sub>N<sub>3</sub>O<sub>2</sub>) 435.1 (100%).

## References

- 1 M. Miura, T. Tsuda, T. Satoh, S. Pivsa-Art and M. Nomura, *J. Org. Chem.*, 1998, **63**, 5211–5215.
- 2 I. Parveen, D. P. Naughton, W. J. D. Whish and M. D. Threadgill, *Bioorg. Med. Chem. Lett.*, 1999, **9**, 2031–2036.
- 3 C. A. Valdez, J. C. Tripp, Y. Miyamoto, J. Kalisiak, P. Hruz, Y. S. Andersen, S. E. Brown, K. Kangas, L. V. Arzu, B. J. Davids, F. D. Gillin, J. A. Upcroft, P. Upcroft, V. V. Fokin, D. K. Smith, K. B. Sharpless and L. Eckmann, *J. Med. Chem.*, 2009, **52**, 4038–4053.
- 4 A. T. O. M. Adebayo, W. R. Bowman and W. G. Salt, *J. Chem. Soc. Perkin 1*, 1987, 2819–2827.
- 5 US2010035883 (A1), 2010.
- 6 C. Kesenheimer, A. Kalogerakis, A. Meißner and U. Groth, *Chem. – Eur. J.*, 2010, **16**, 8805–8821.
- 7 G. Papageorgiou and J. E. T. Corrie, *Tetrahedron*, 1999, **55**, 237–254.
- 8 A. J. Woodhead, H. Angove, M. G. Carr, G. Chessari, M. Congreve, J. E. Coyle, J. Cosme, B. Graham, P. J. Day, R. Downham, L. Fazal, R. Feltell, E. Figueroa, M. Frederickson, J. Lewis, R. McMenemy, C. W. Murray, M. A. O'Brien, L. Parra, S. Patel, T. Phillips, D. C. Rees, S. Rich, D.-M. Smith, G. Trewartha, M. Vinkovic, B. Williams and A. J.-A. Woolford, *J. Med. Chem.*, 2010, **53**, 5956–5969.
- 9 F. A. Davis and Y. W. Andemichael, *J. Org. Chem.*, 1999, **64**, 8627–8634.
- 10 M. Watanabe, S. Ijichi and S. Furukawa, *Synthesis*, 1993, **1993**, 94–98.
- 11 S. C. Koeberle, S. Fischer, D. Schollmeyer, V. Schattel, C. Grütter, D. Rauh and S. A. Laufer, *J. Med. Chem.*, 2012, **55**, 5868–5877.

**<sup>1</sup>H NMR Compound 4**

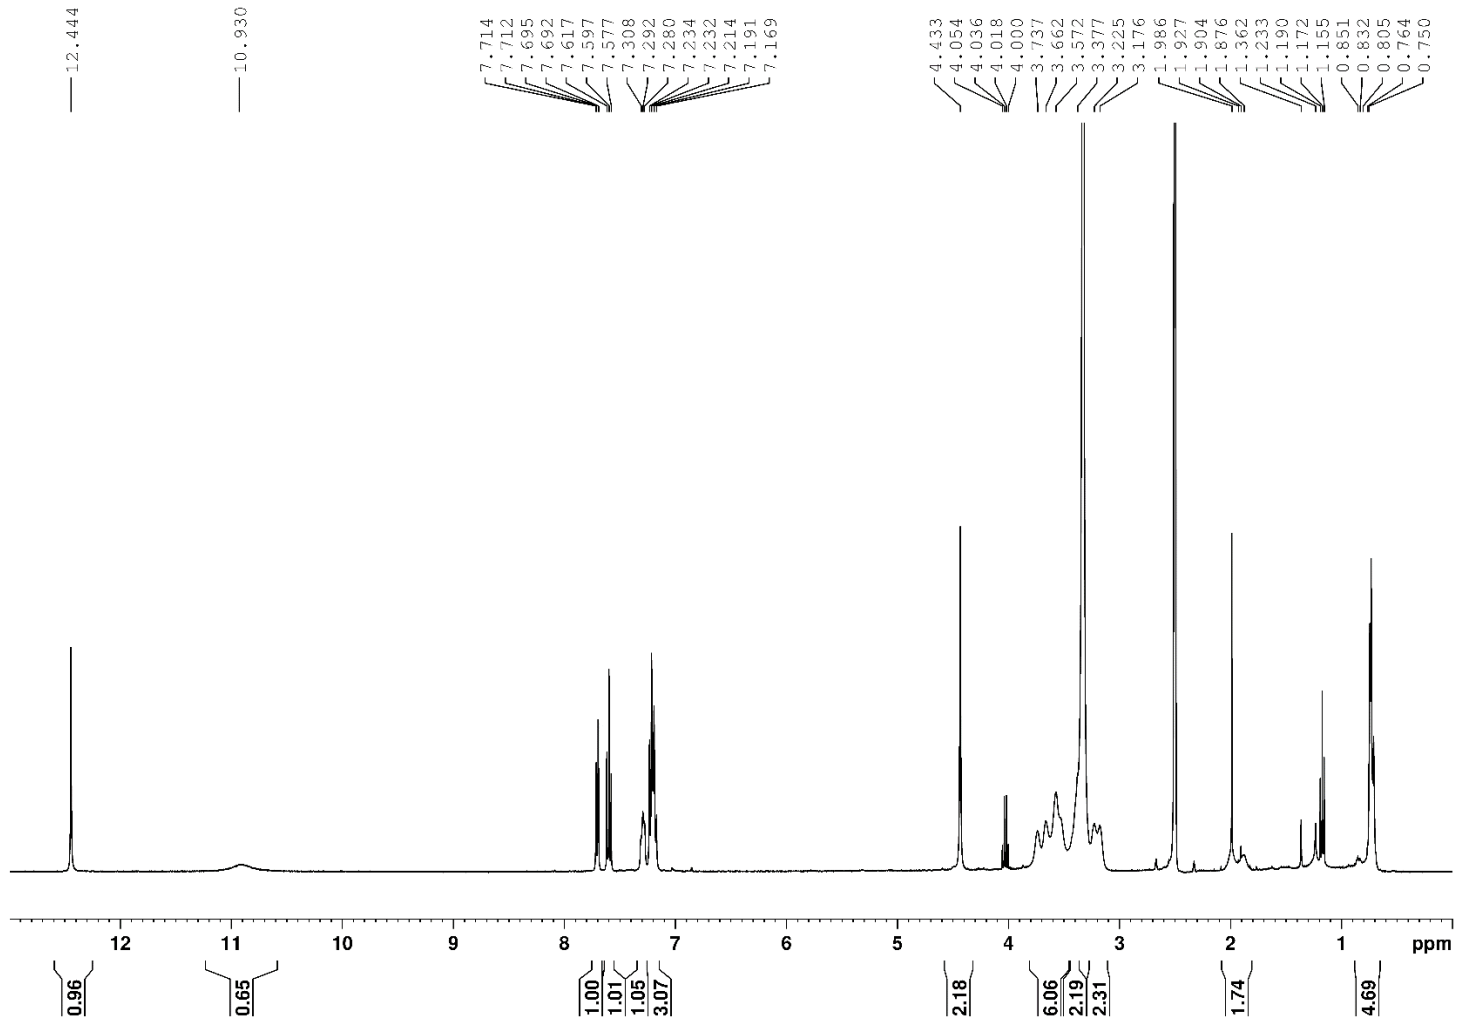

**<sup>13</sup>C NMR (APT) Compound 4**

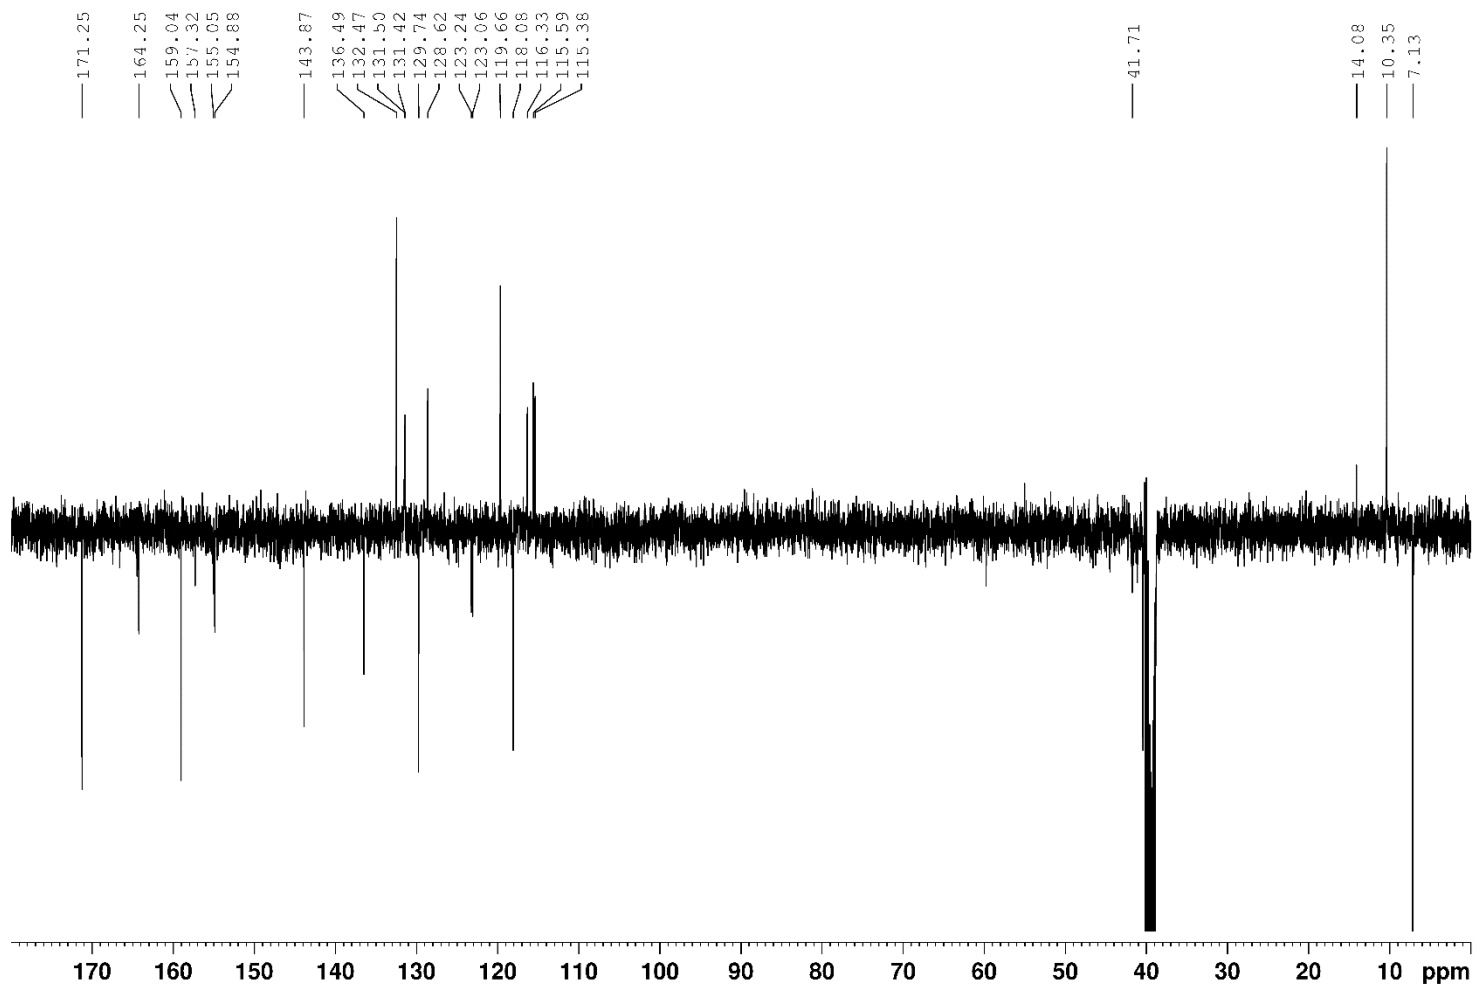

# <sup>1</sup>H NMR Compound 5

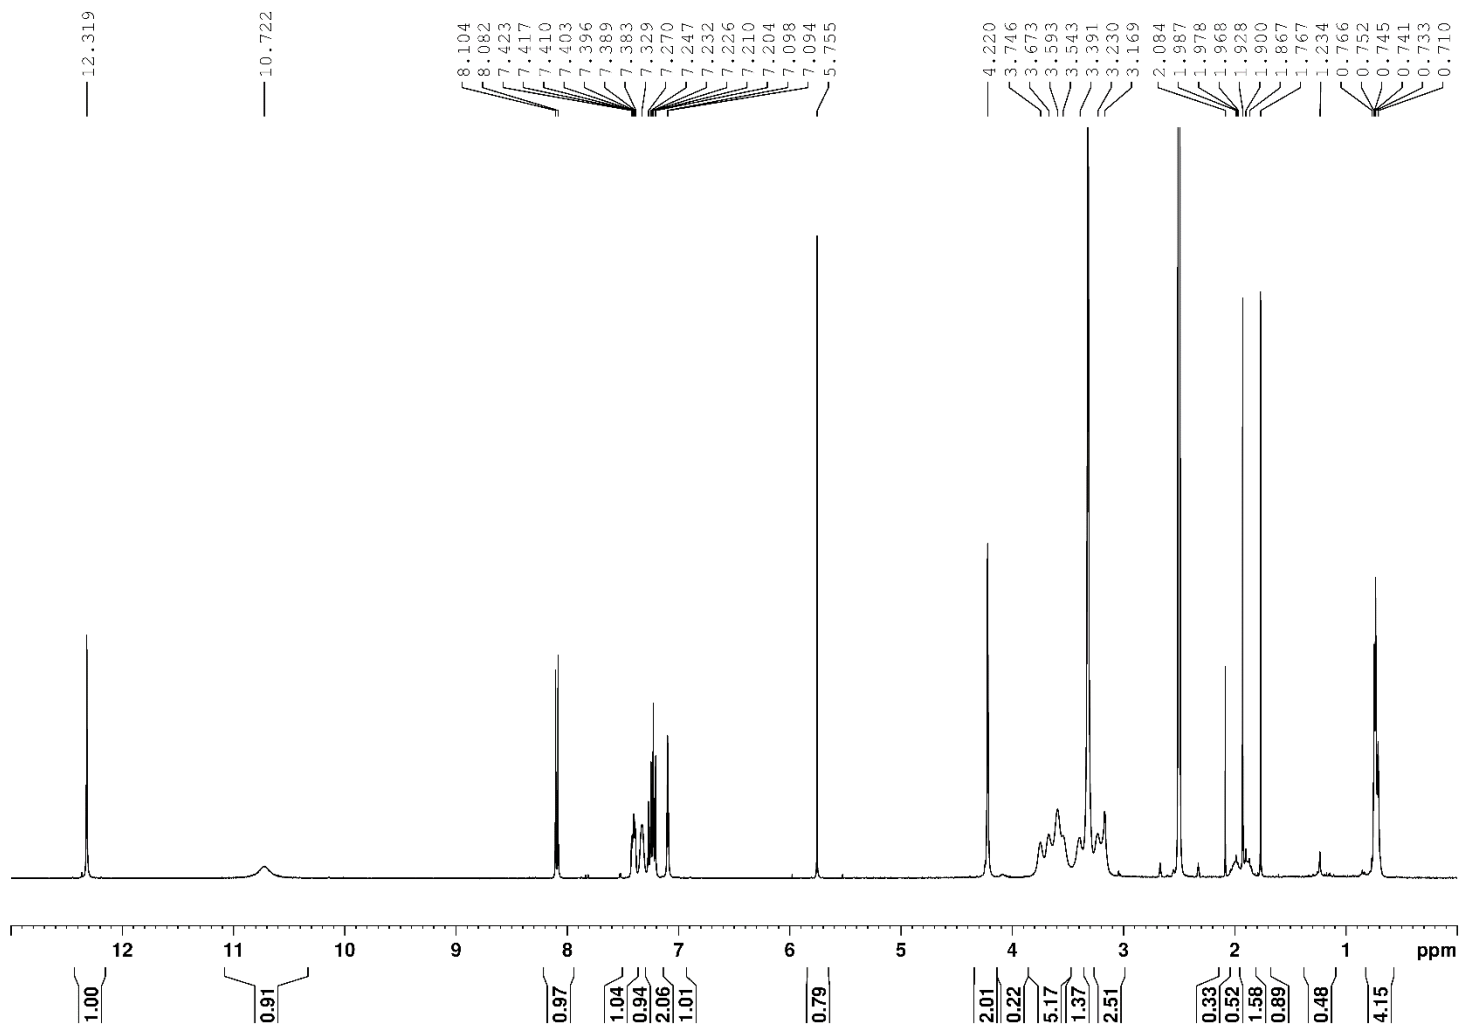

**<sup>13</sup>C NMR (APT) Compound 5**

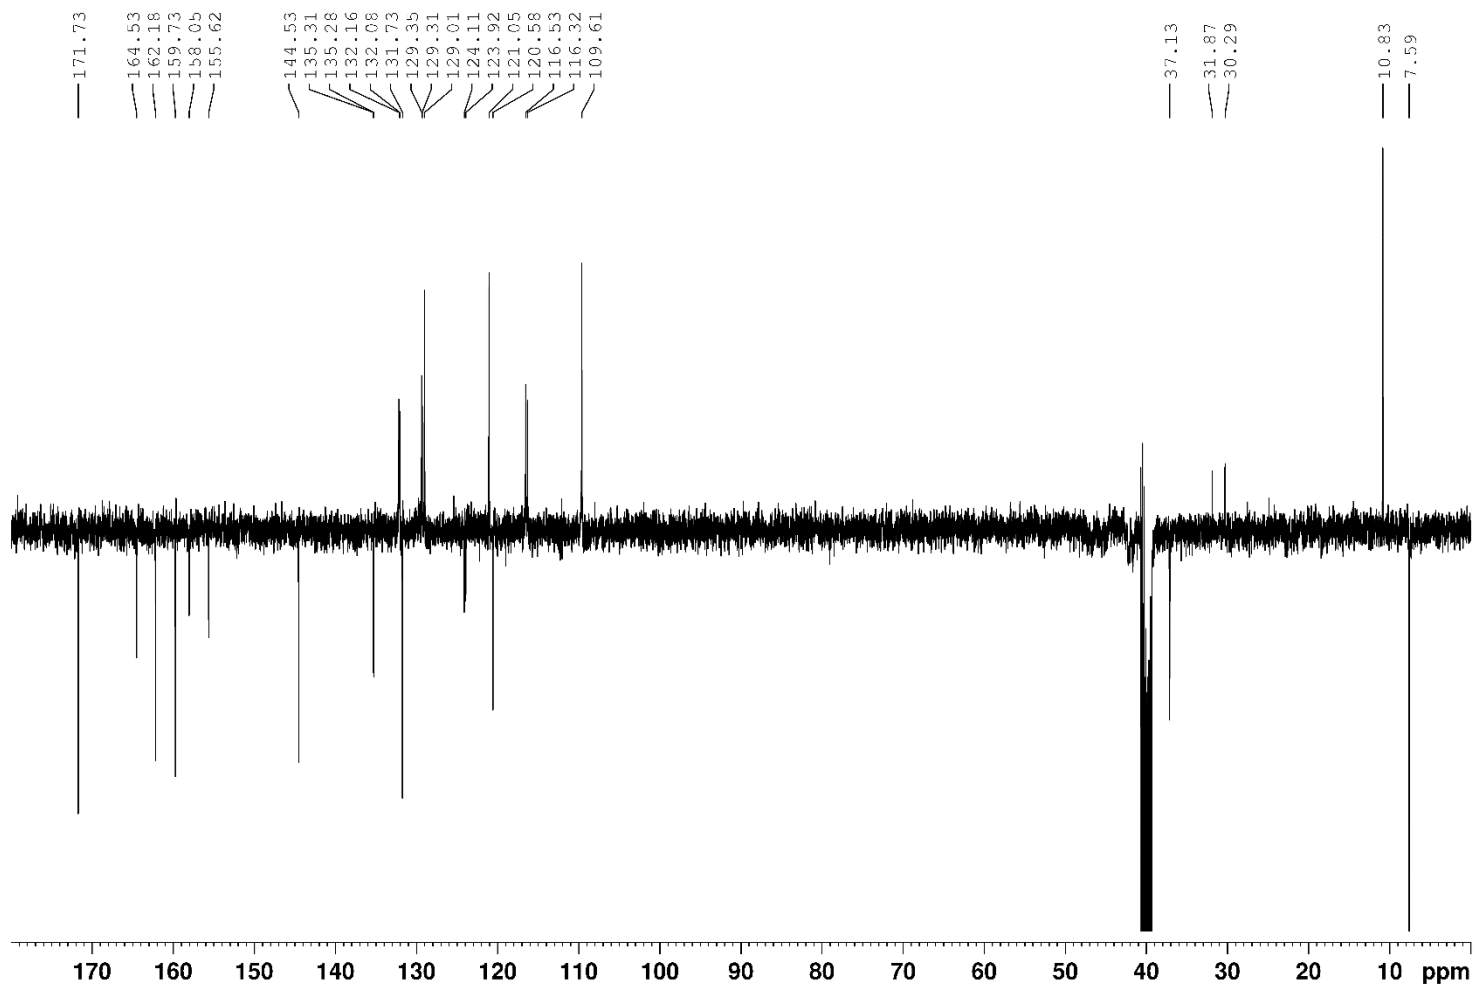

# <sup>1</sup>H NMR Compound 6

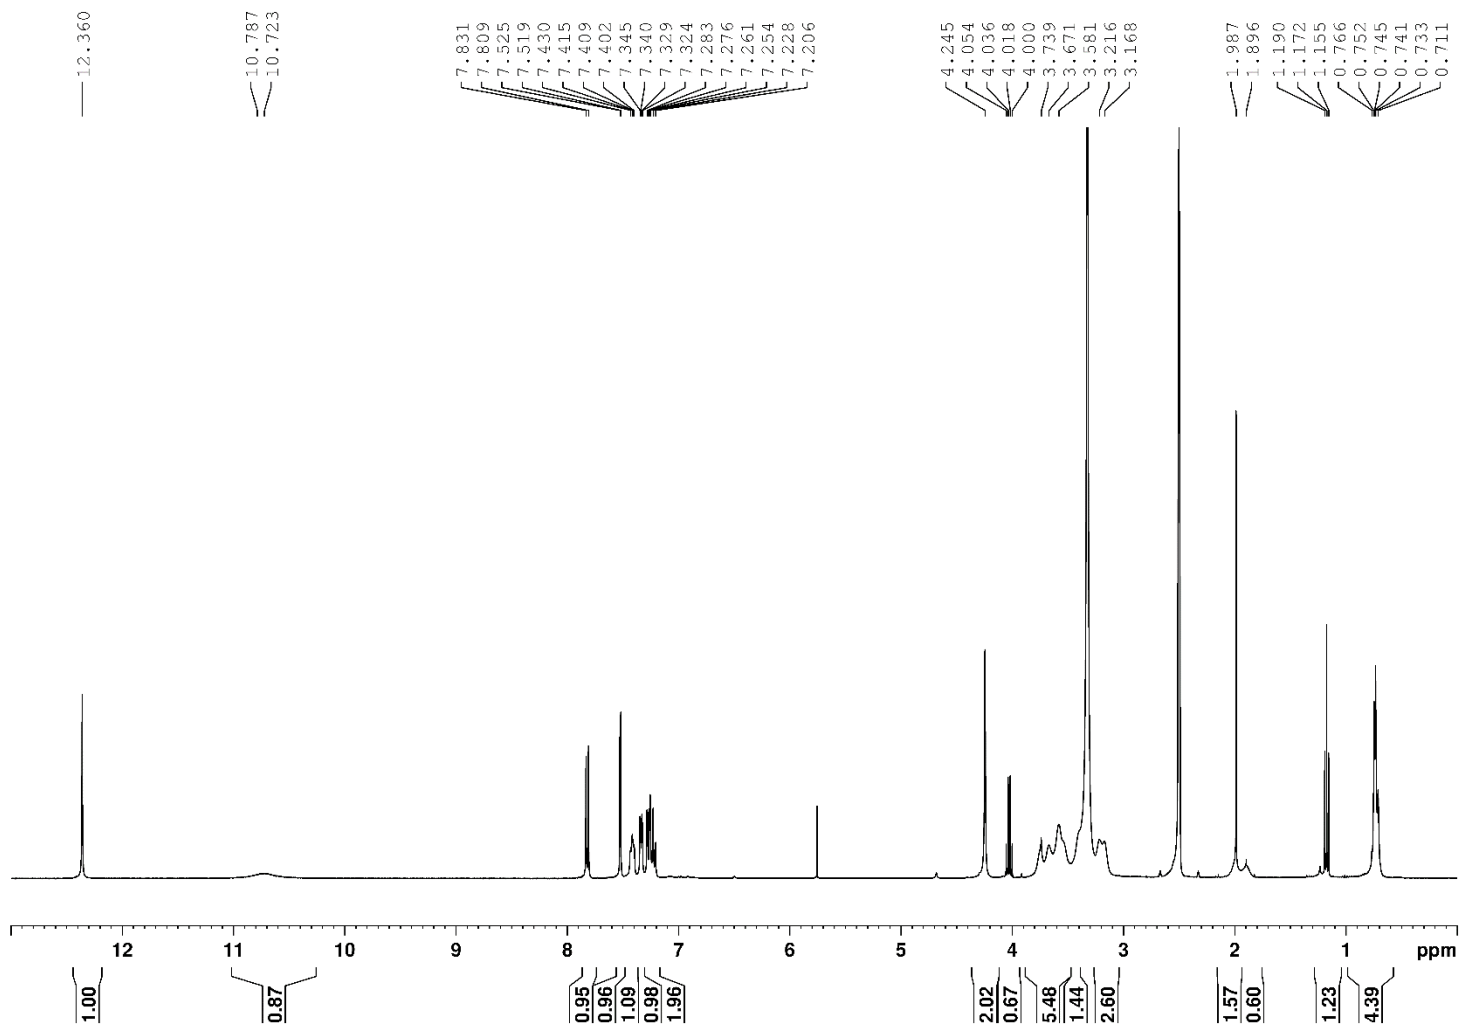



**<sup>13</sup>C NMR (APT) Compound 6**

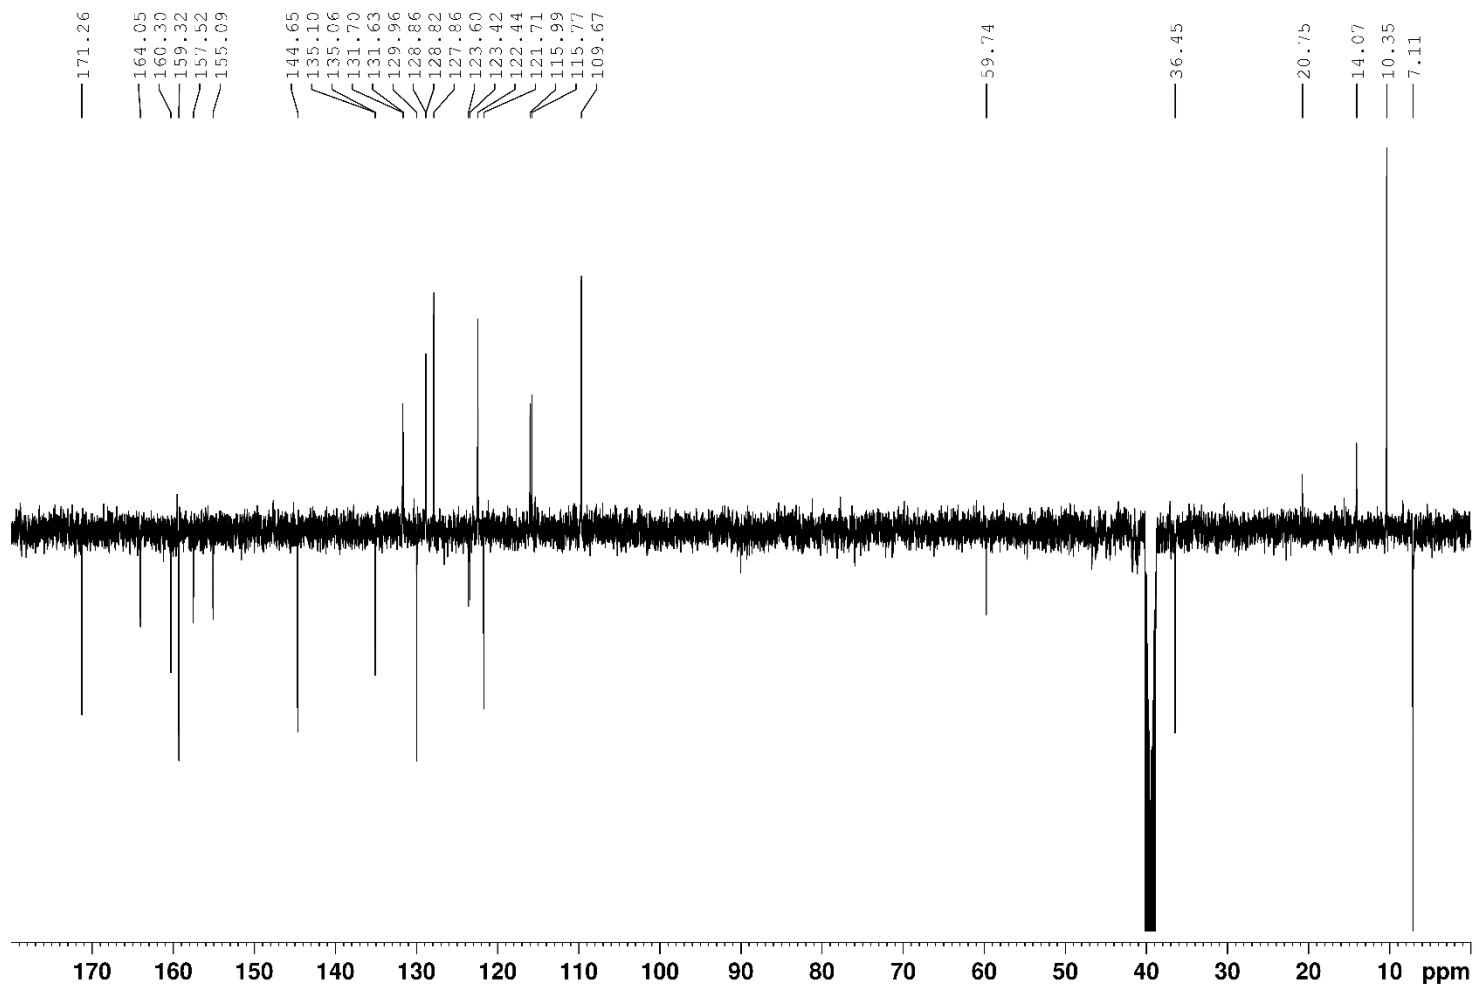

**<sup>1</sup>H NMR Compound 7**

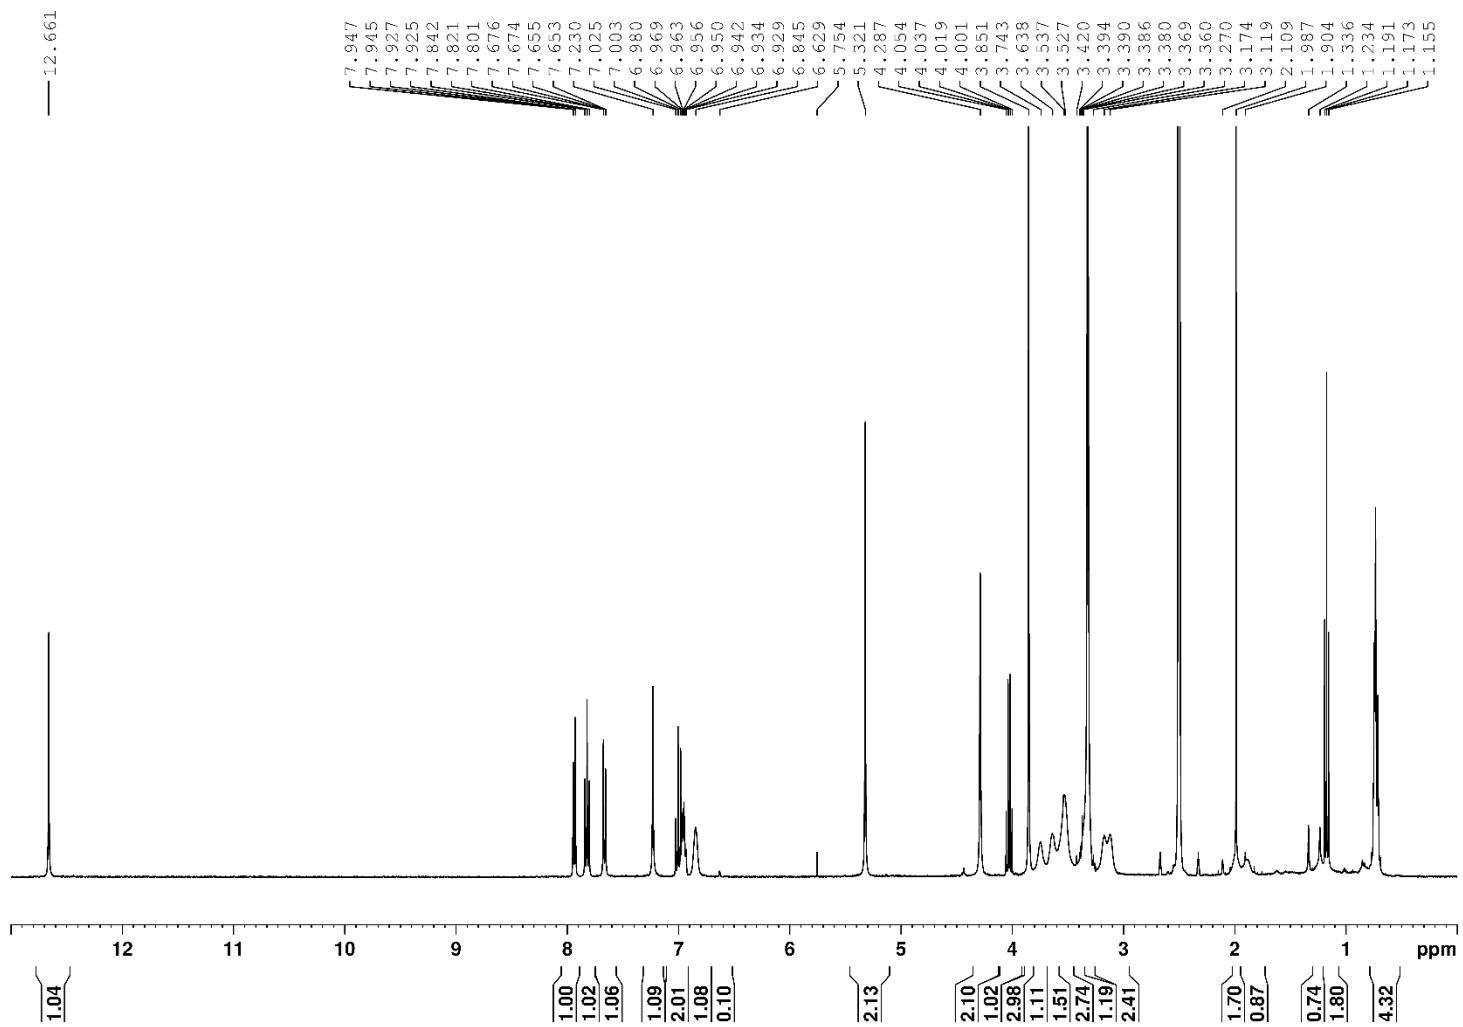

**<sup>13</sup>C NMR (APT) Compound 7**

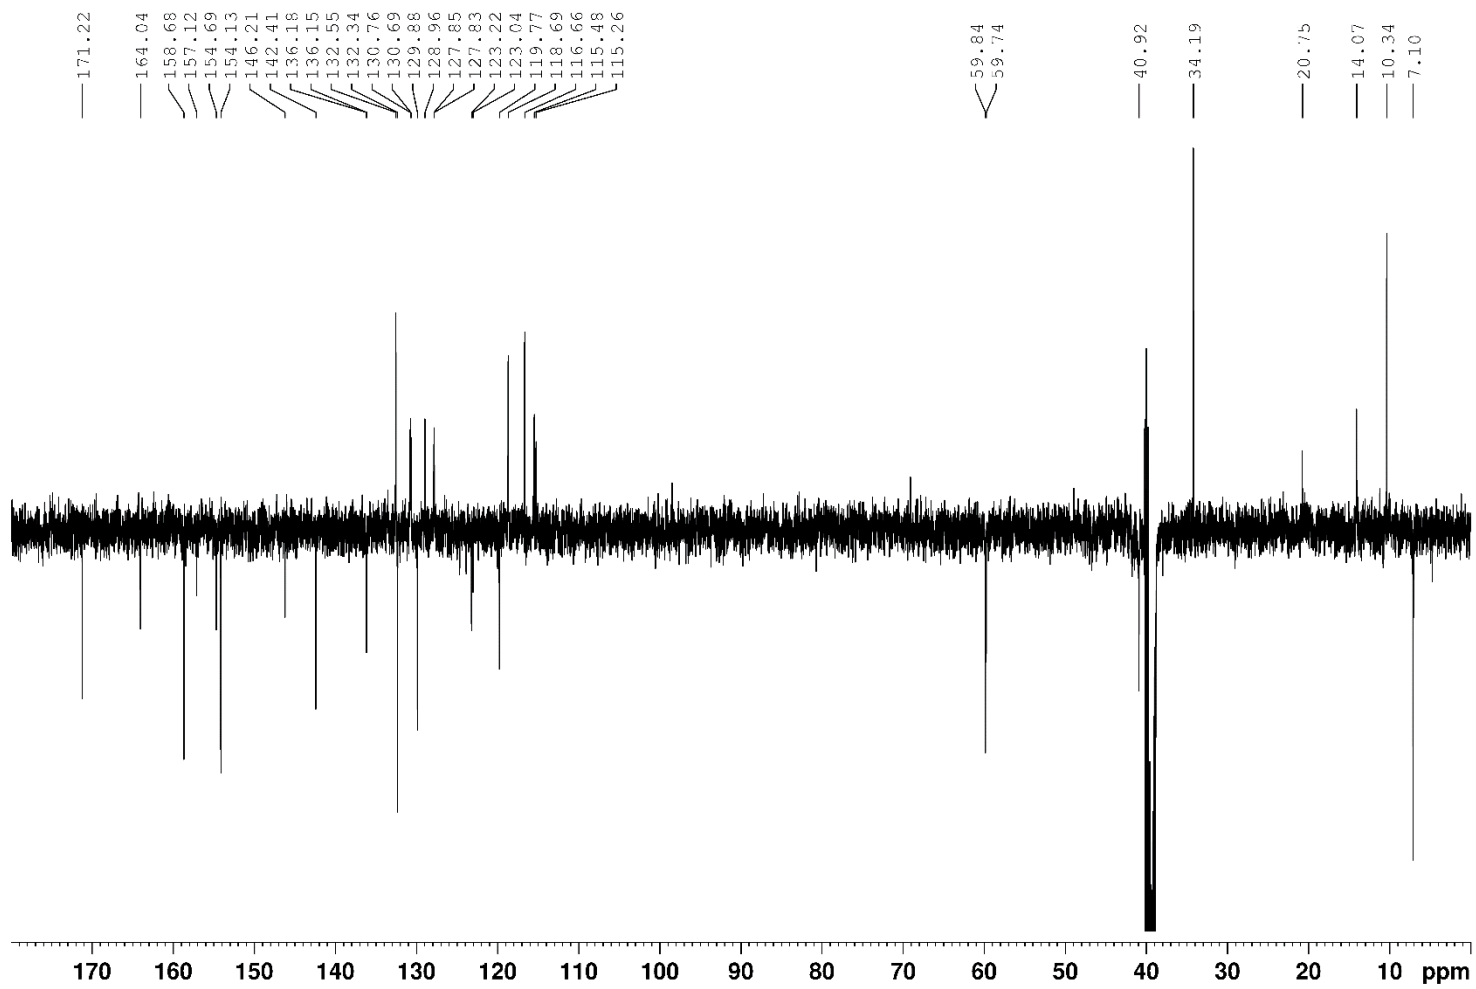

# <sup>1</sup>H NMR Compound 8

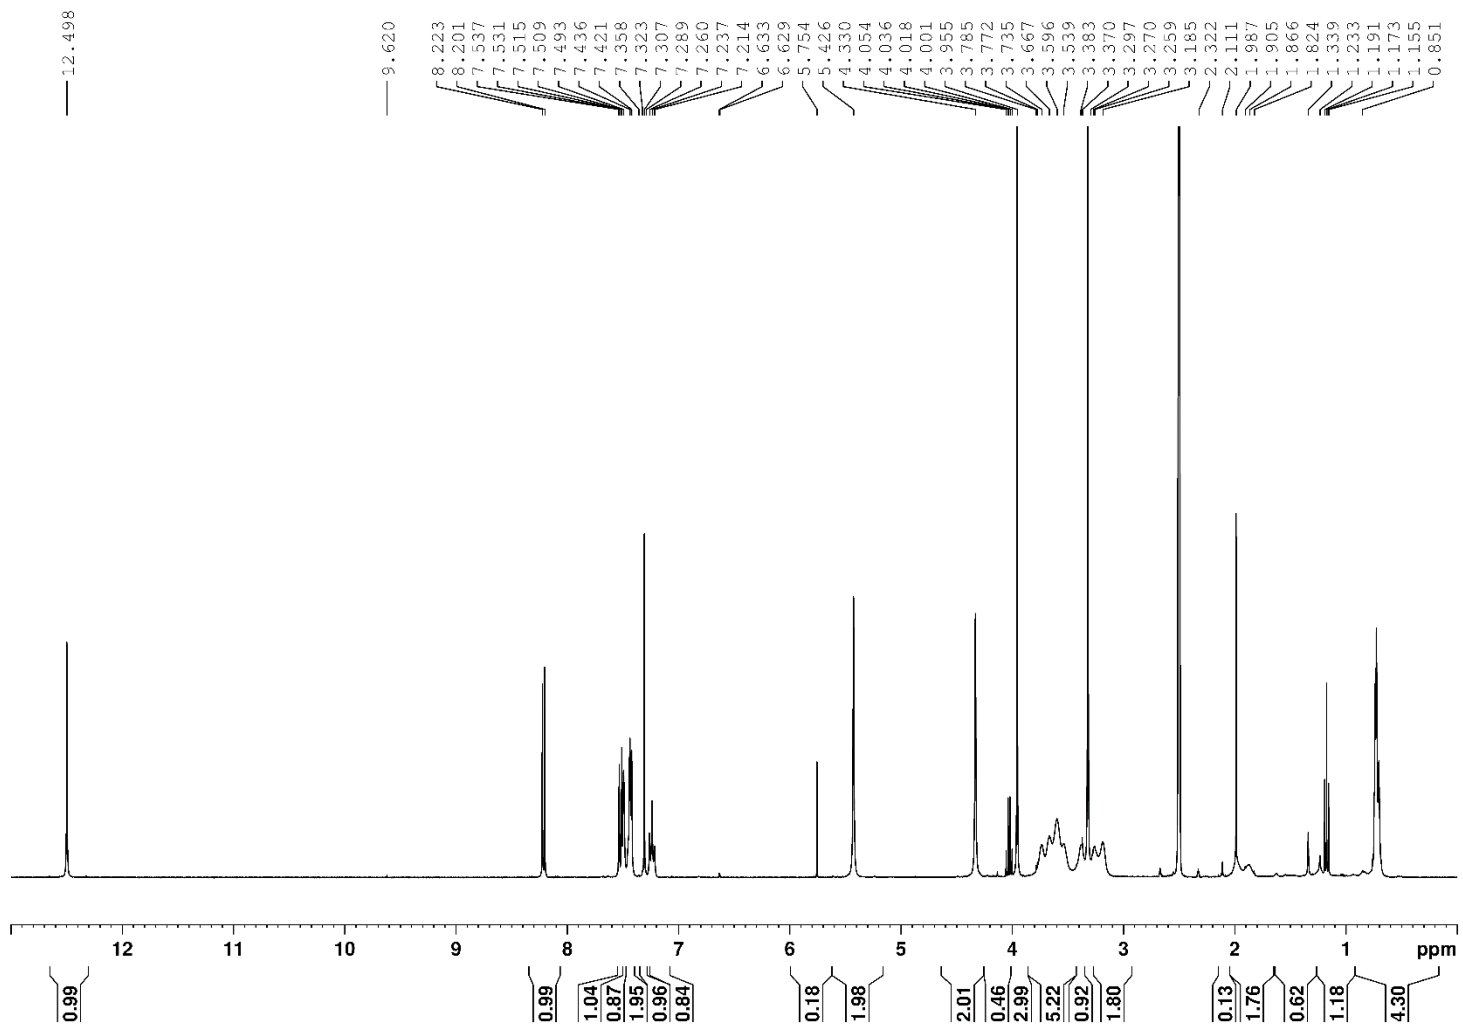

**<sup>13</sup>C NMR (APT) Compound 8**

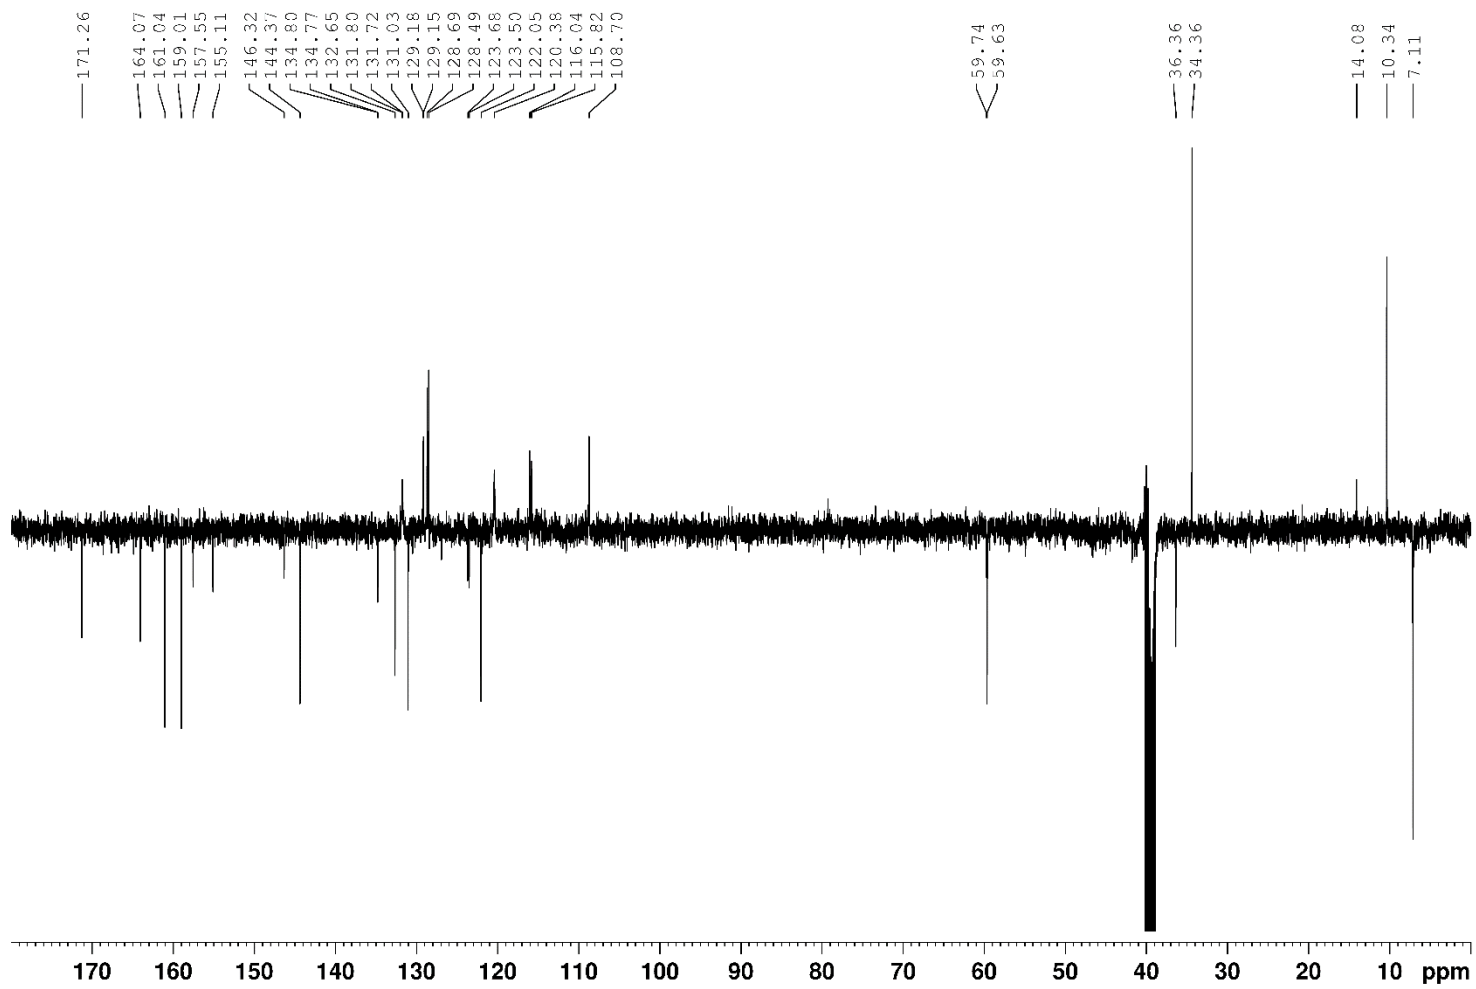

**<sup>1</sup>H NMR Compound 9**

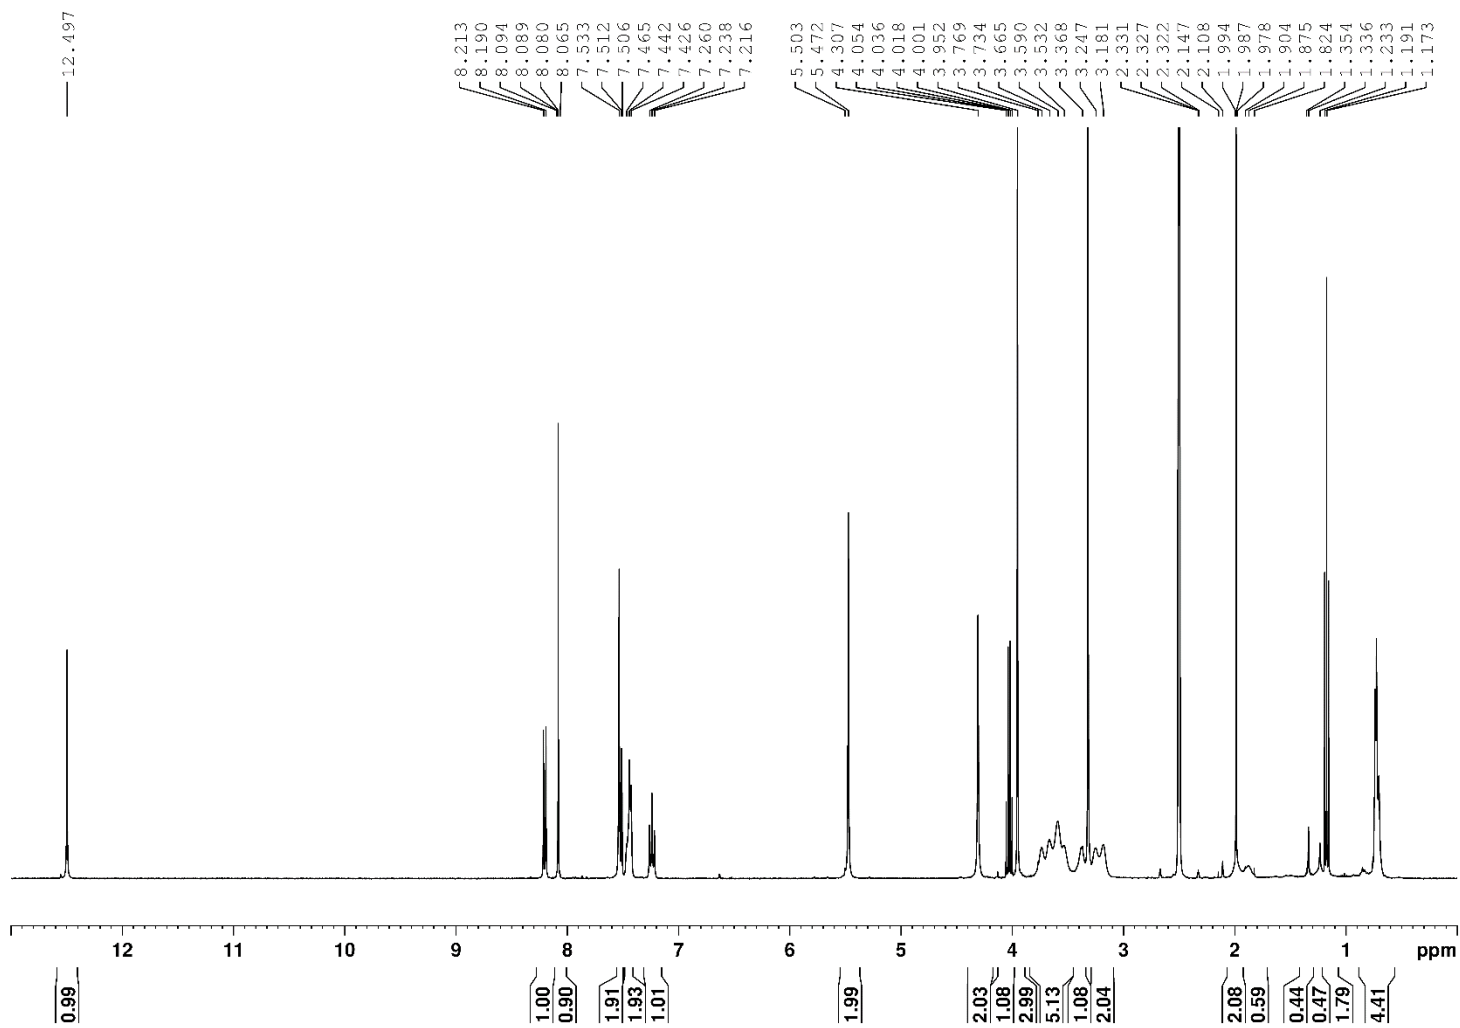

**<sup>13</sup>C NMR (APT) Compound 9**

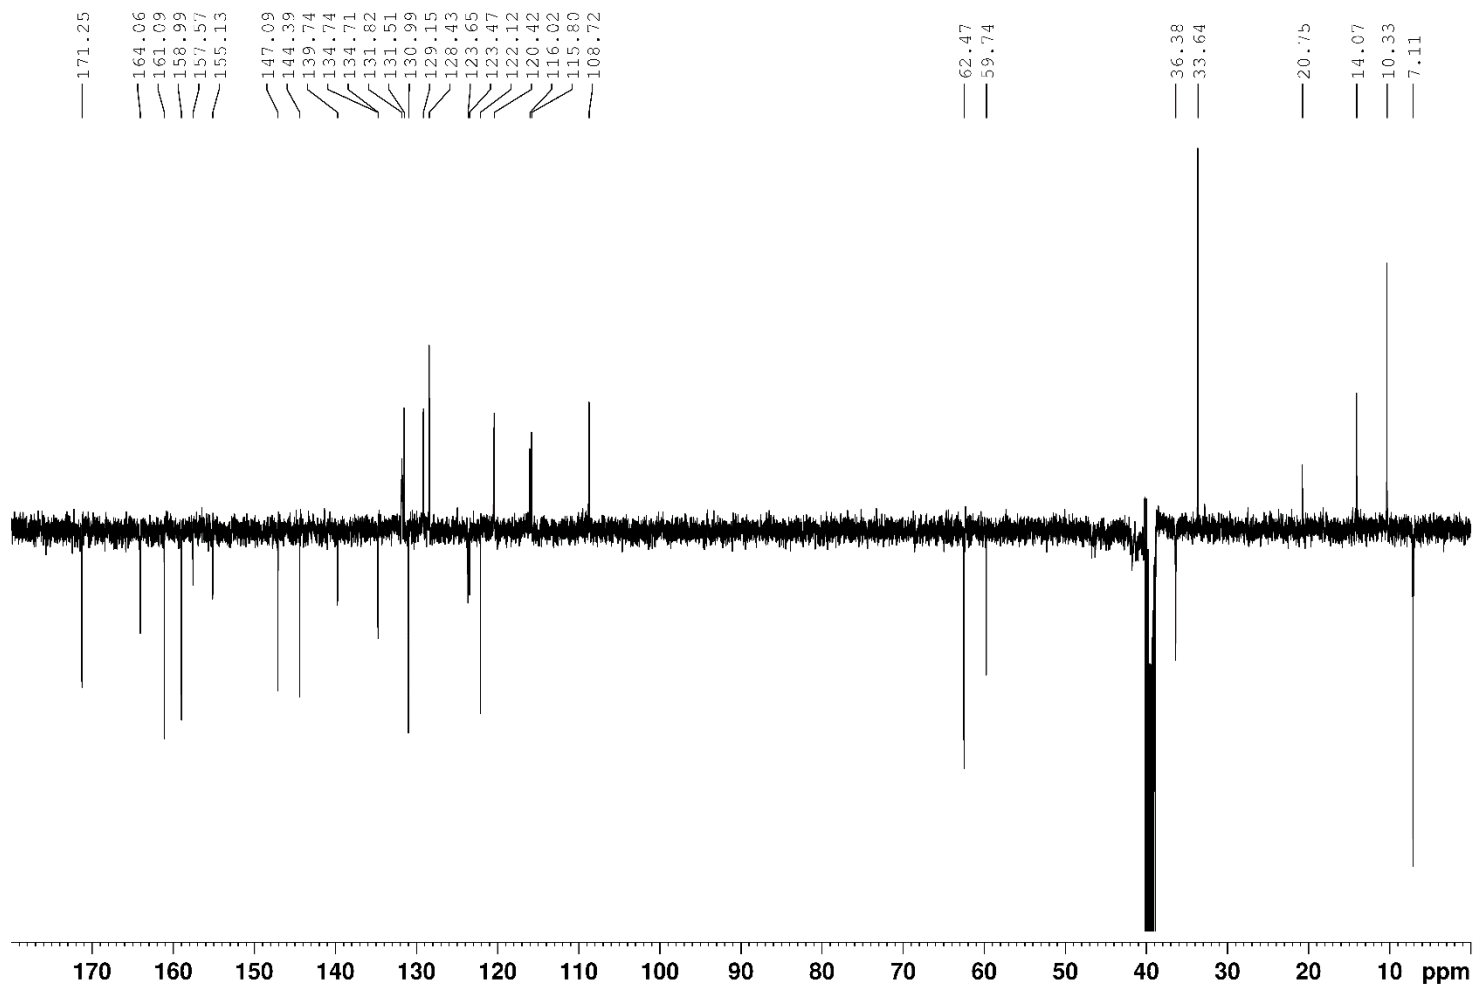

# <sup>1</sup>H NMR Compound 10

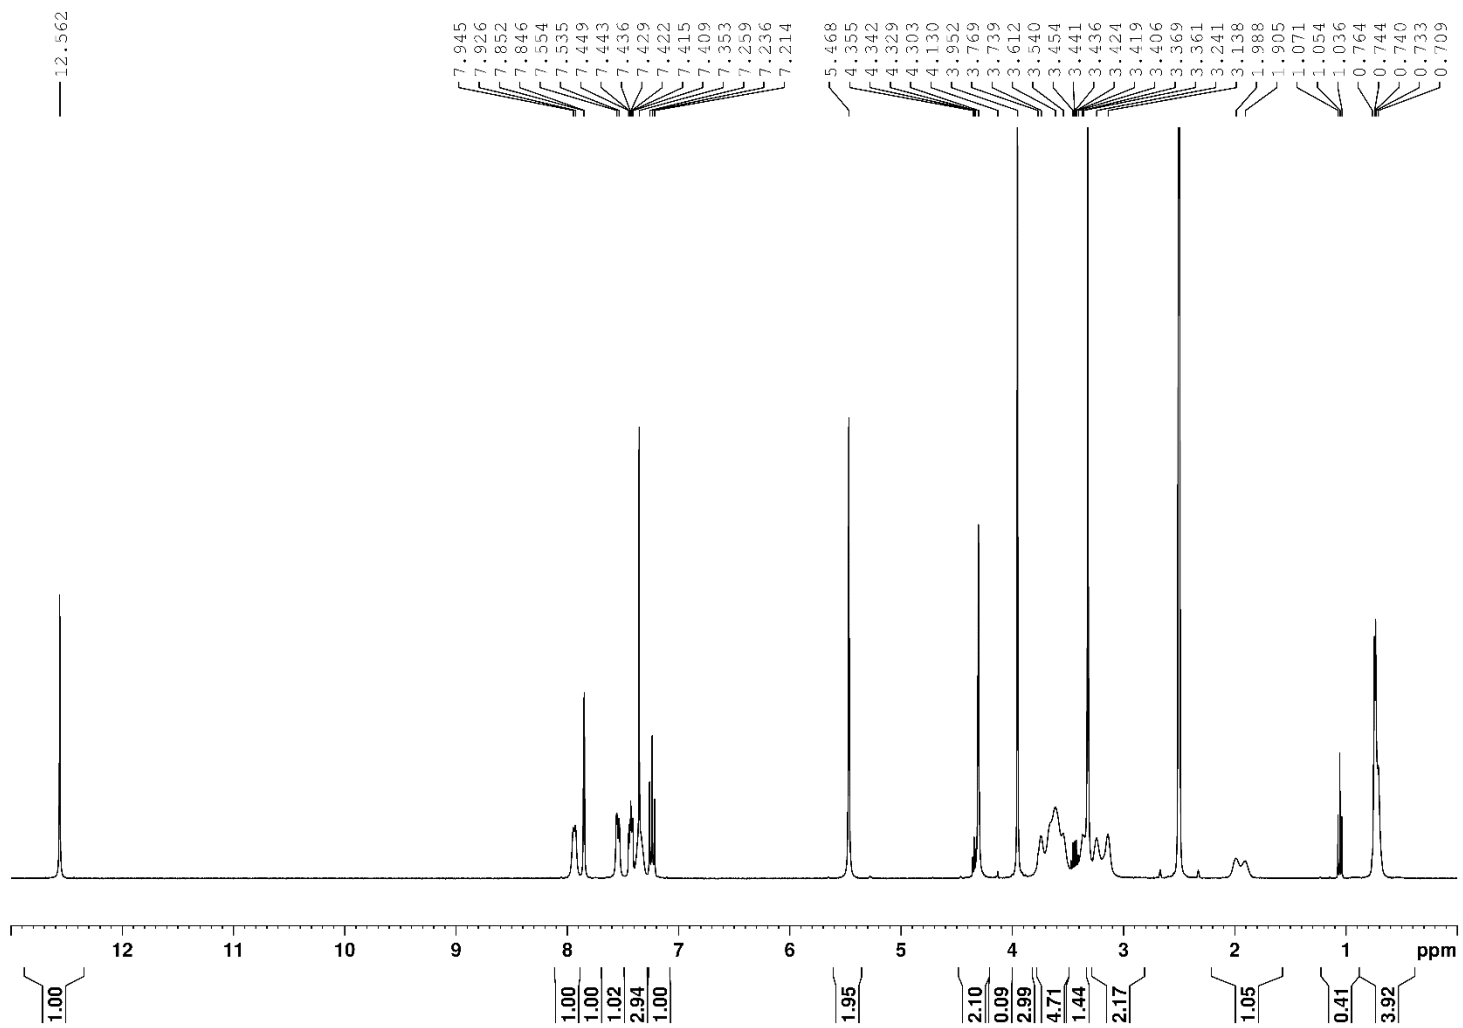



**<sup>13</sup>C NMR (APT) Compound 10**

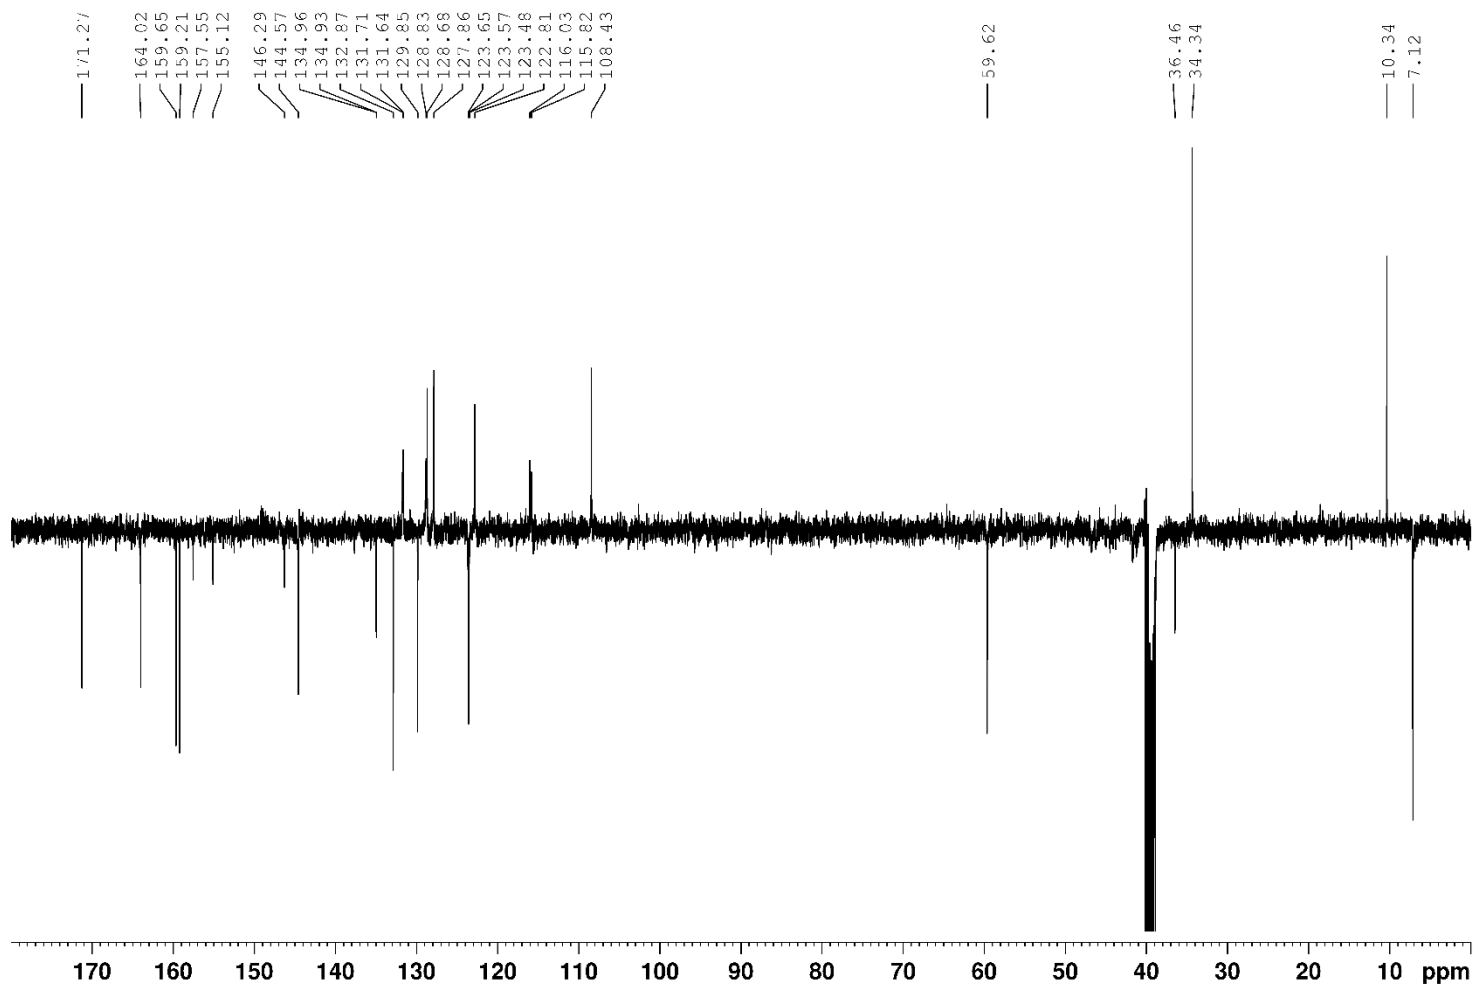

# <sup>1</sup>H NMR Compound 11

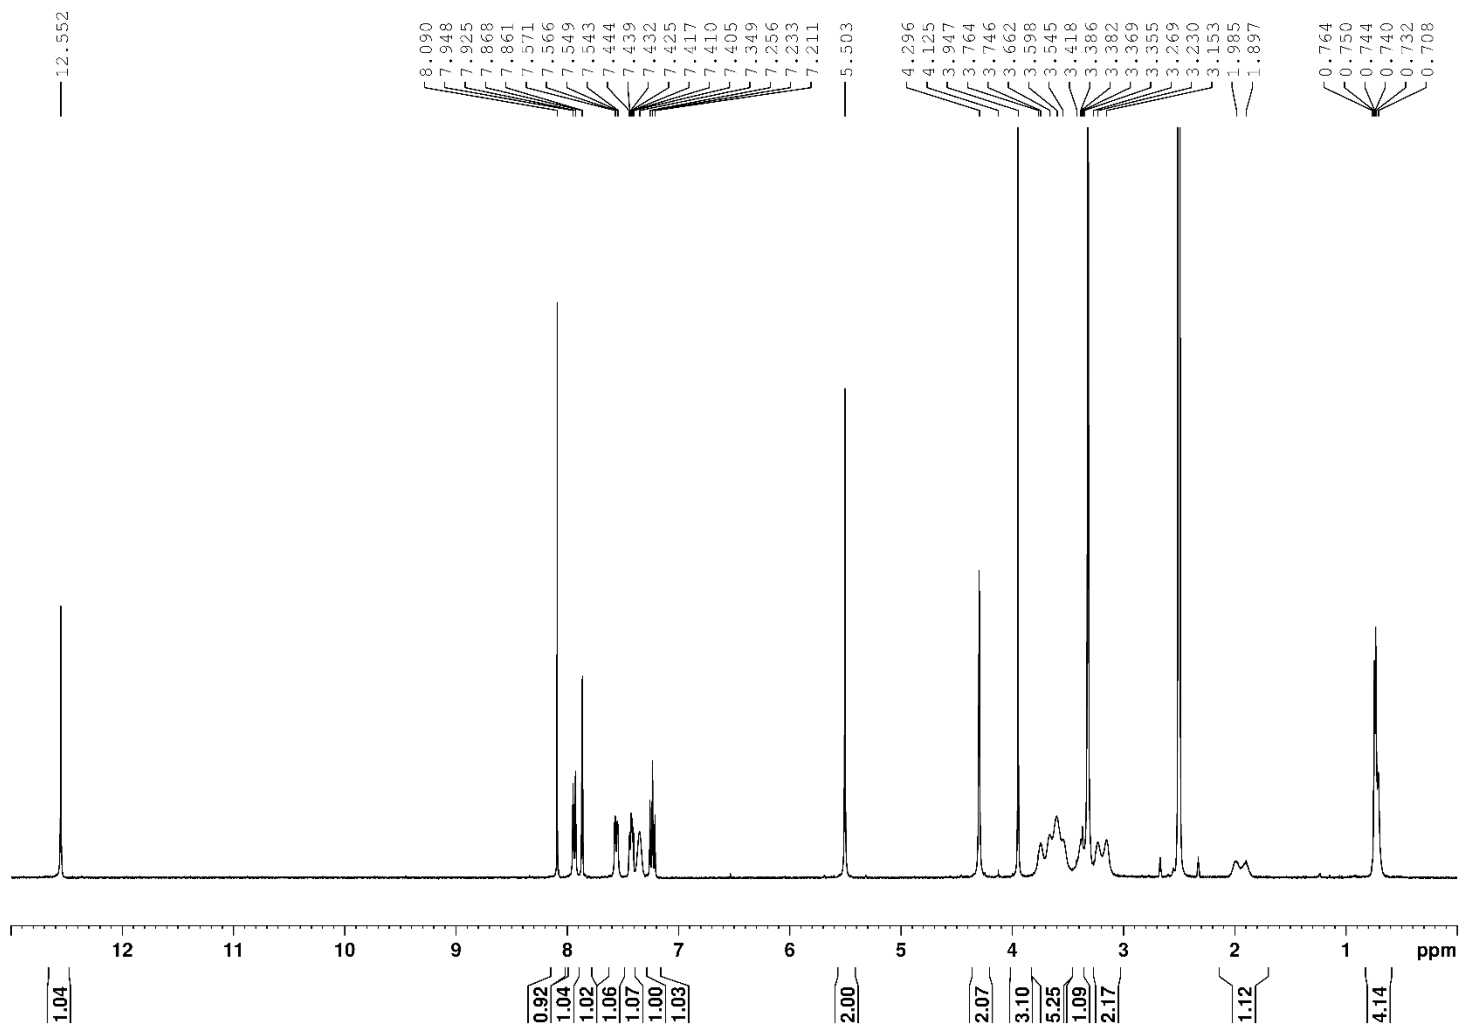

**<sup>13</sup>C NMR (APT) Compound 11**

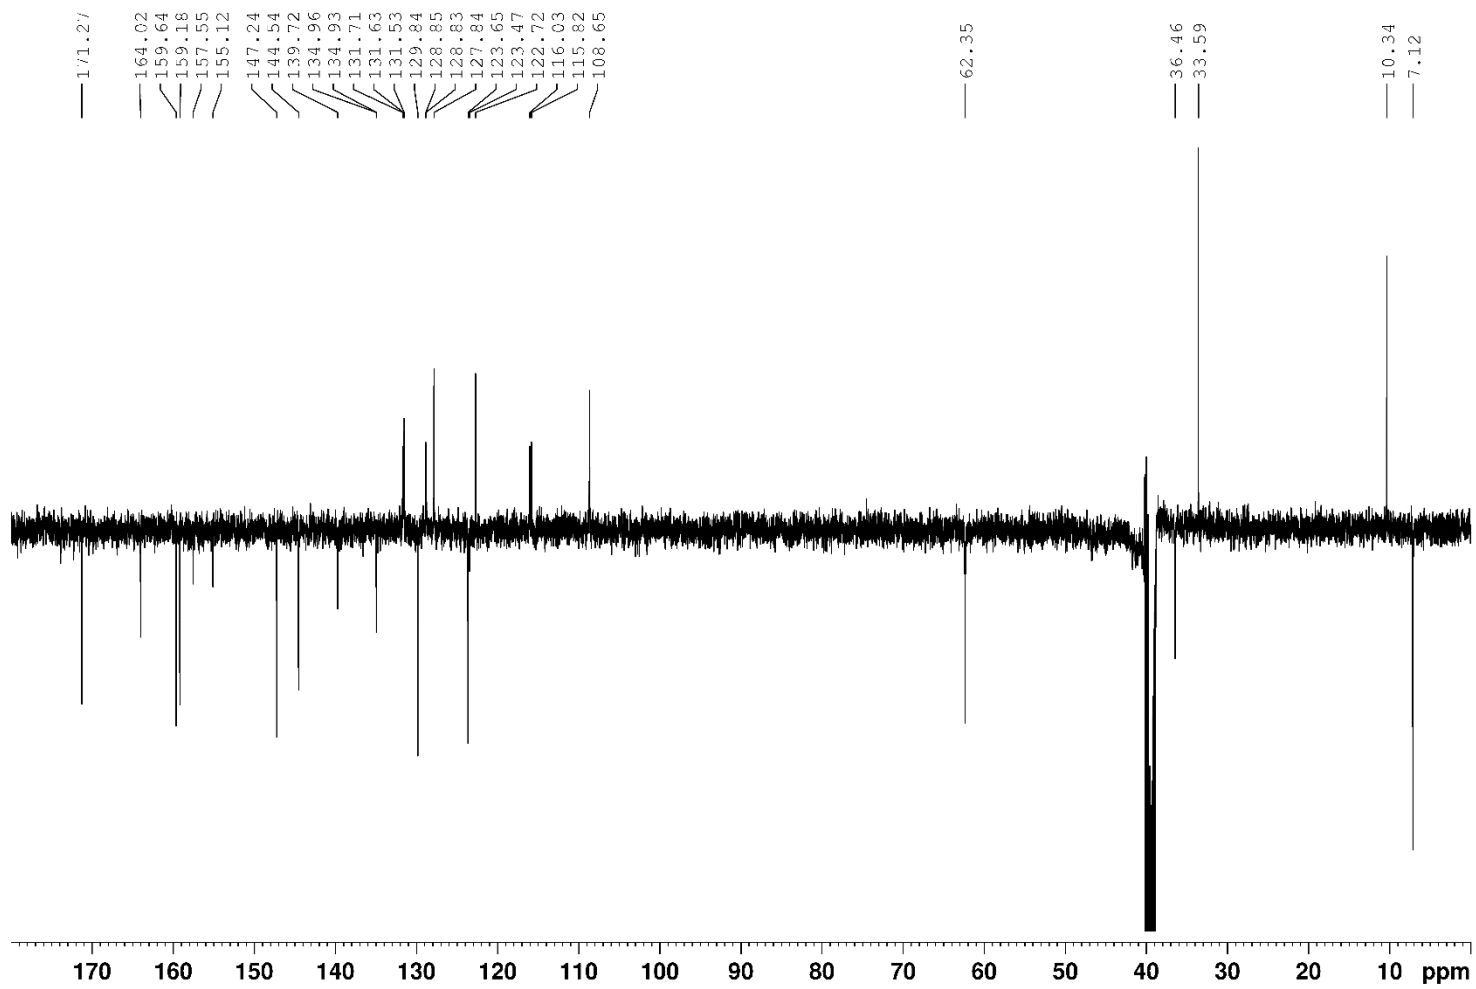

**<sup>1</sup>H NMR Compound 18**

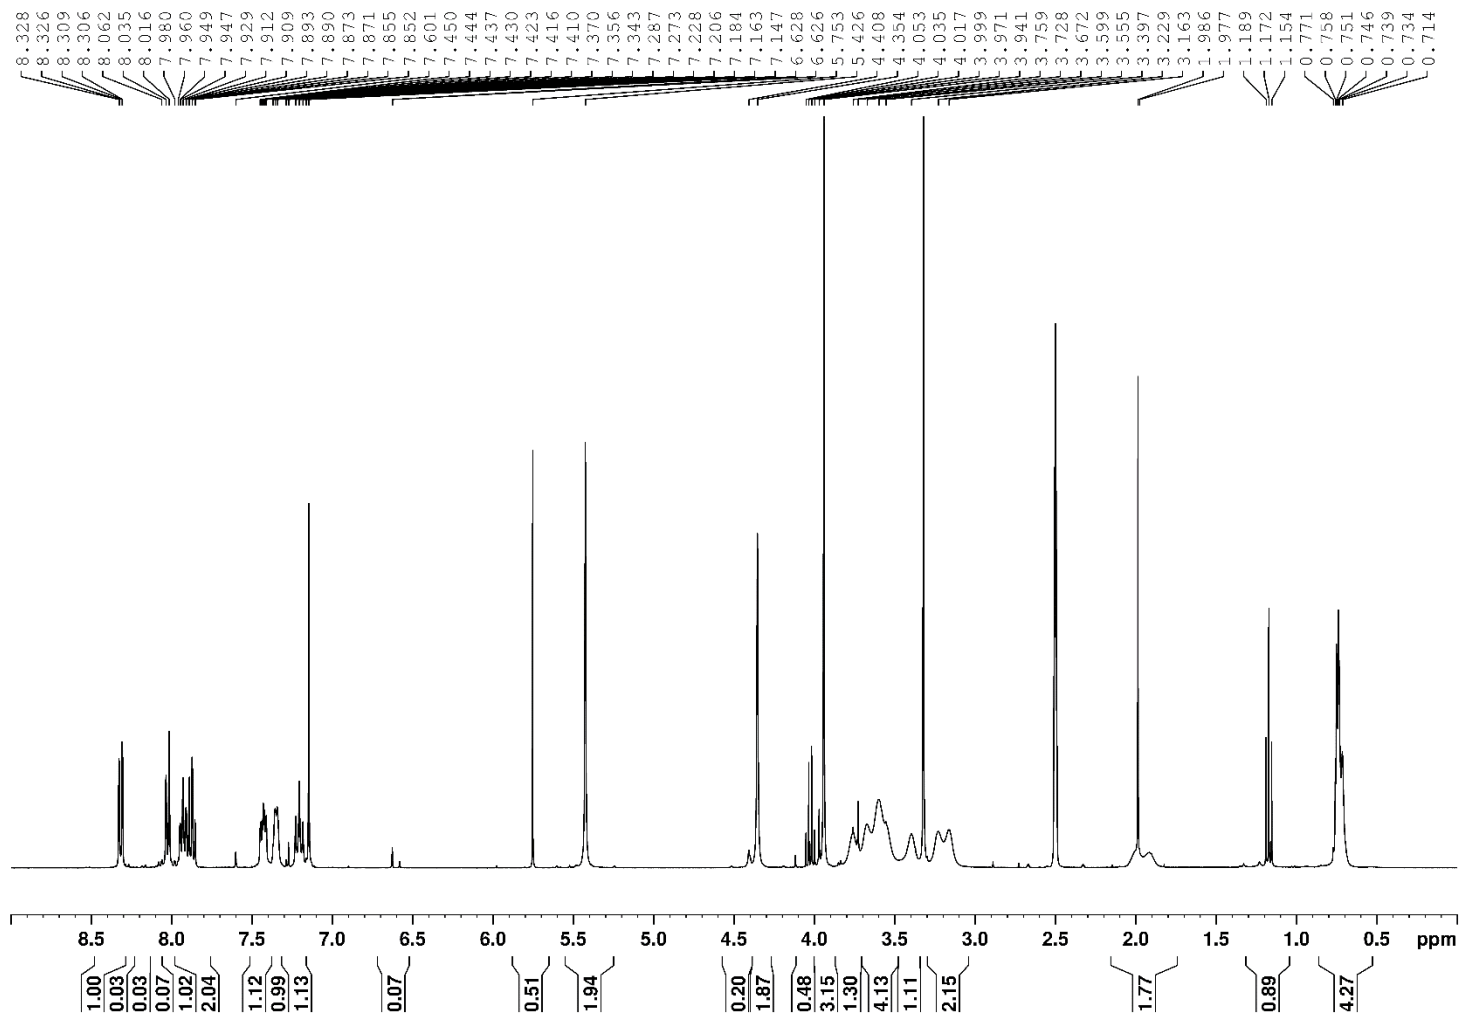

**<sup>13</sup>C NMR (APT) Compound 18**

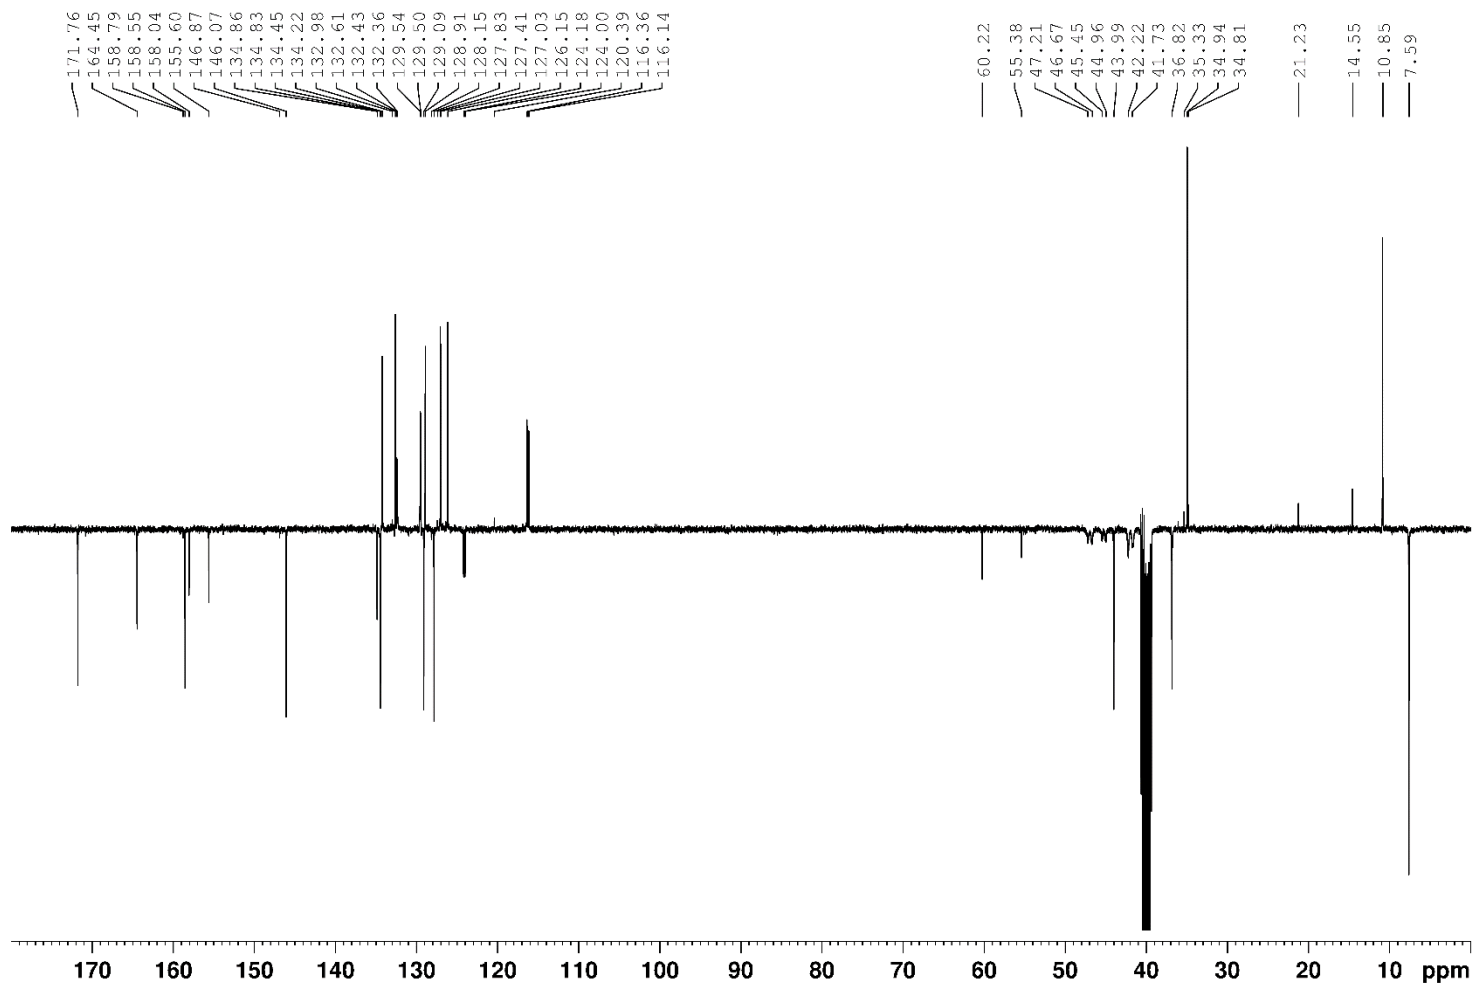

**<sup>1</sup>H NMR Compound 38**

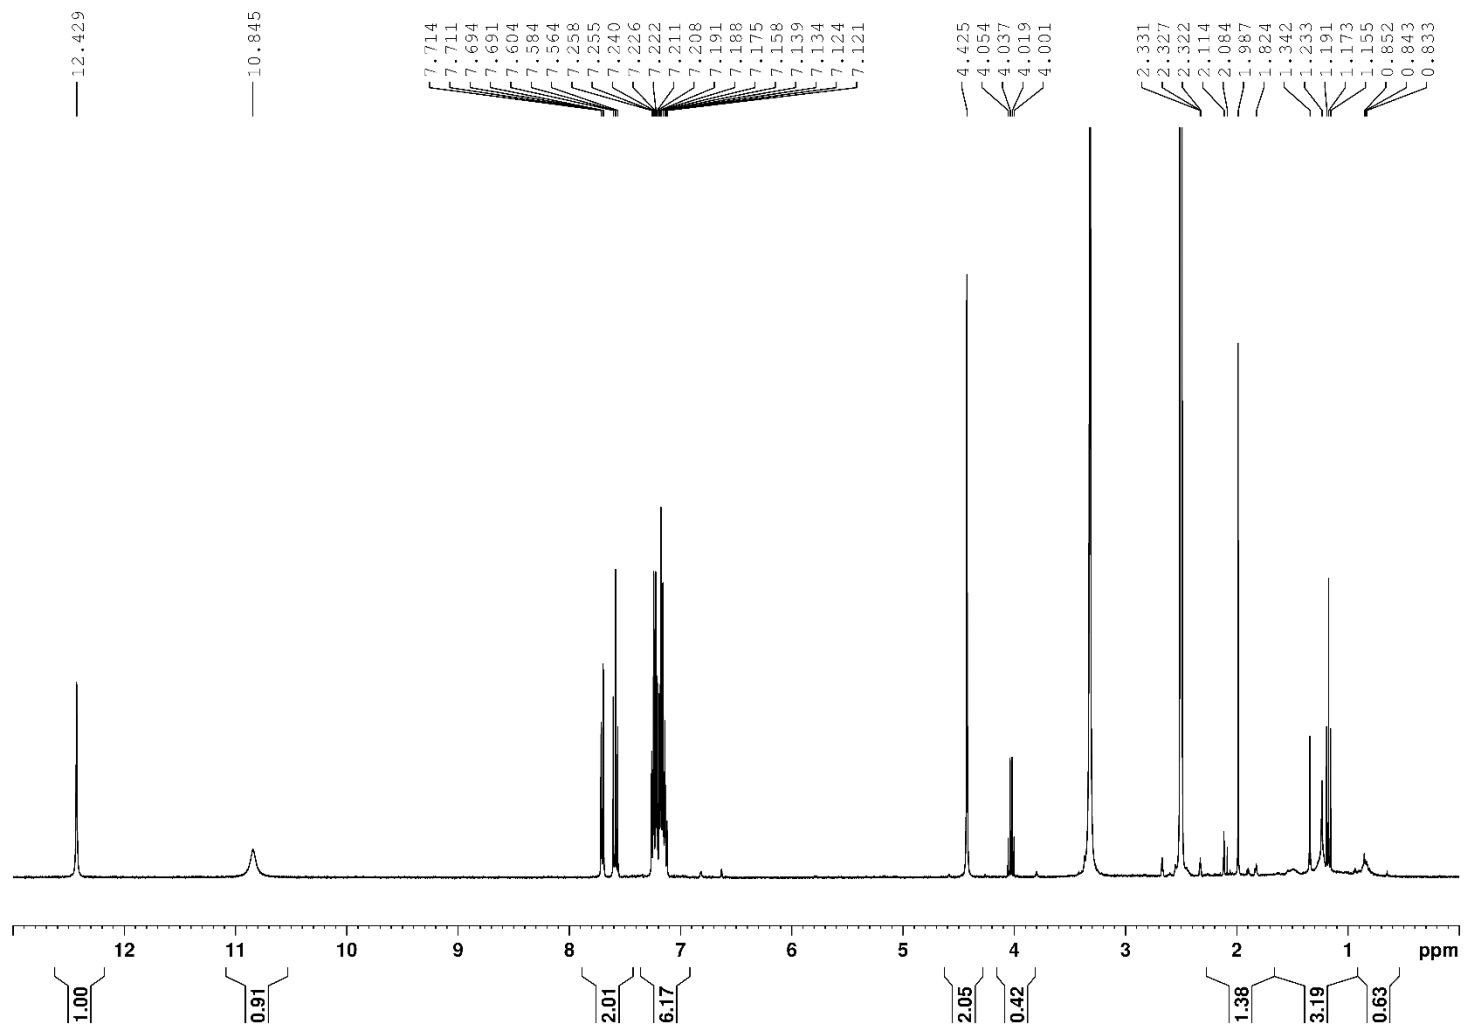

**<sup>13</sup>C NMR (APT) Compound 38**

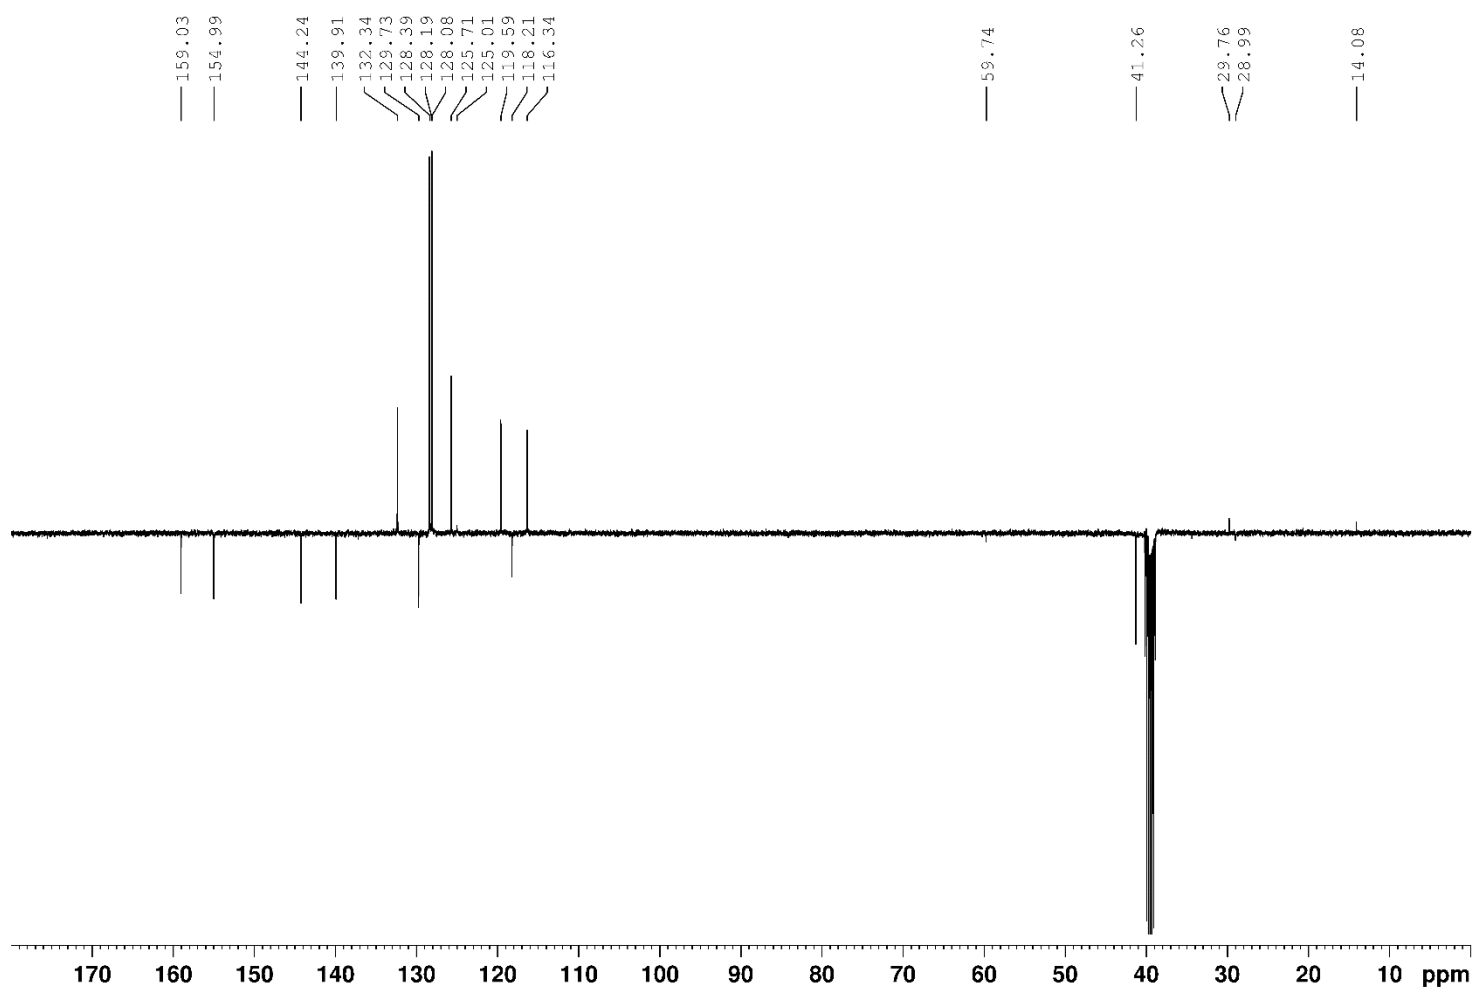

**<sup>1</sup>H NMR Compound 39**

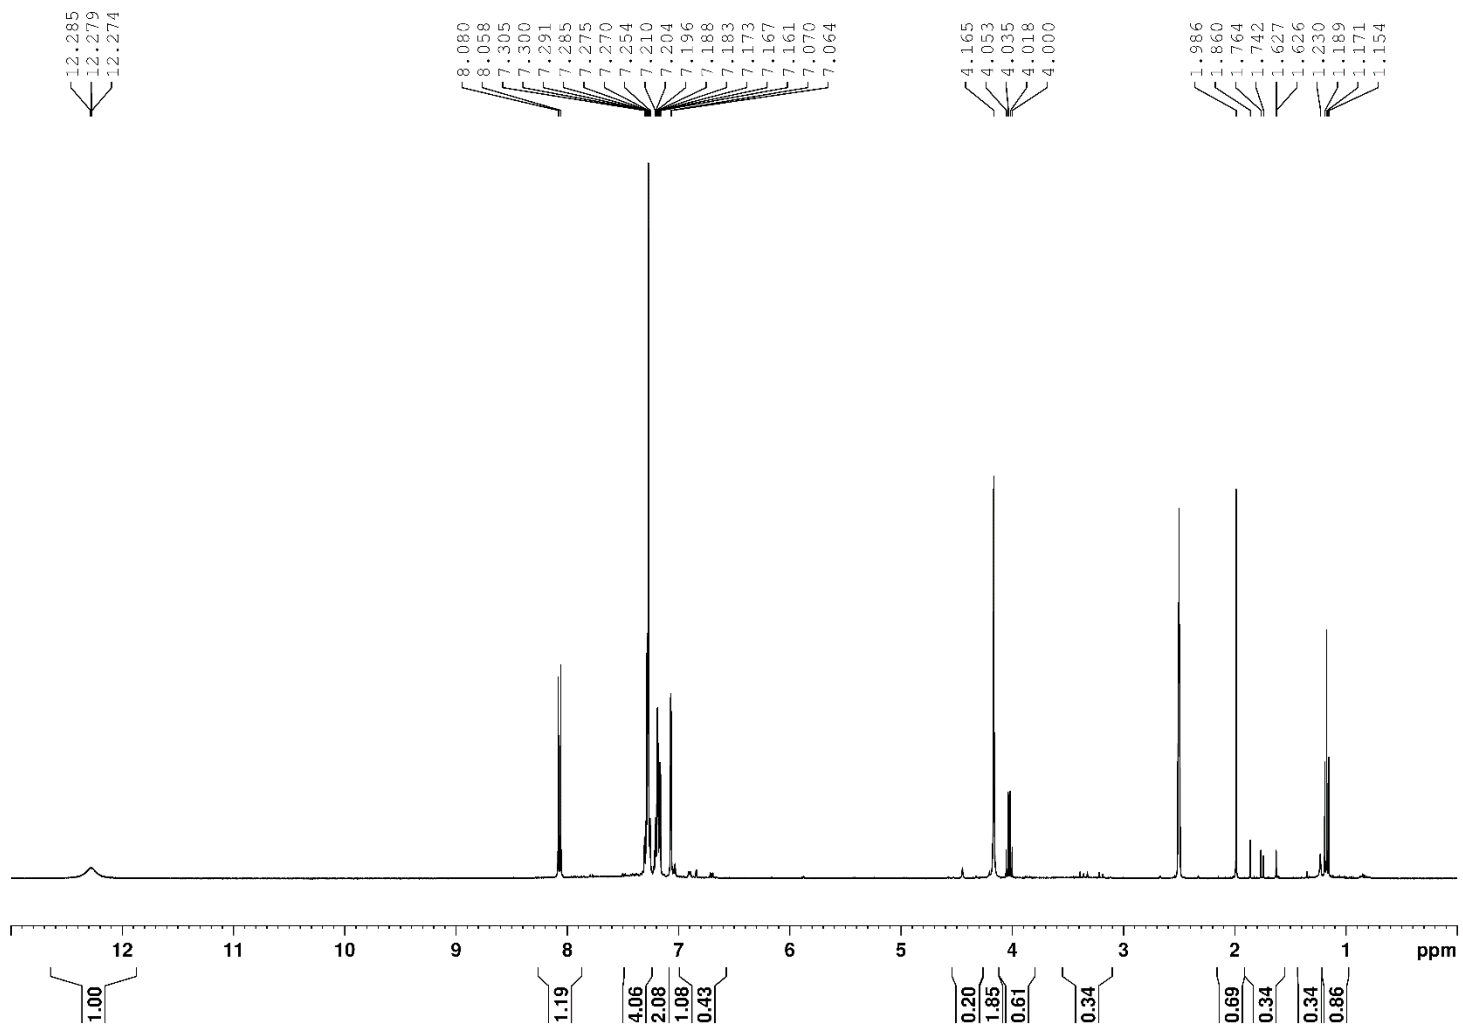



**<sup>13</sup>C NMR (APT) Compound 39**

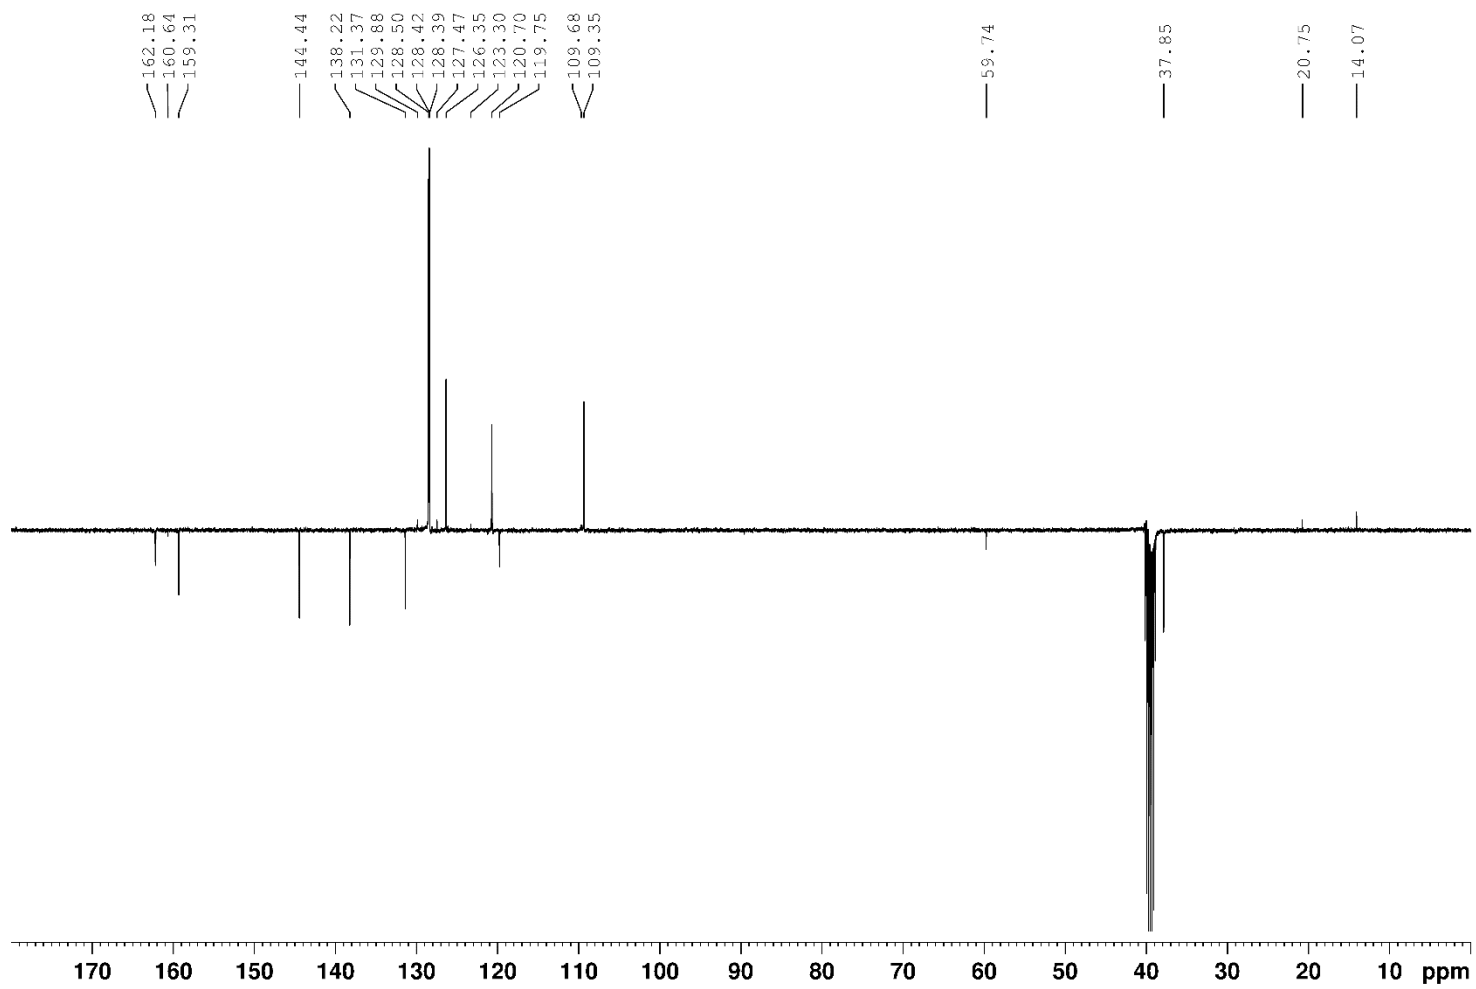

**<sup>1</sup>H NMR Compound 40**

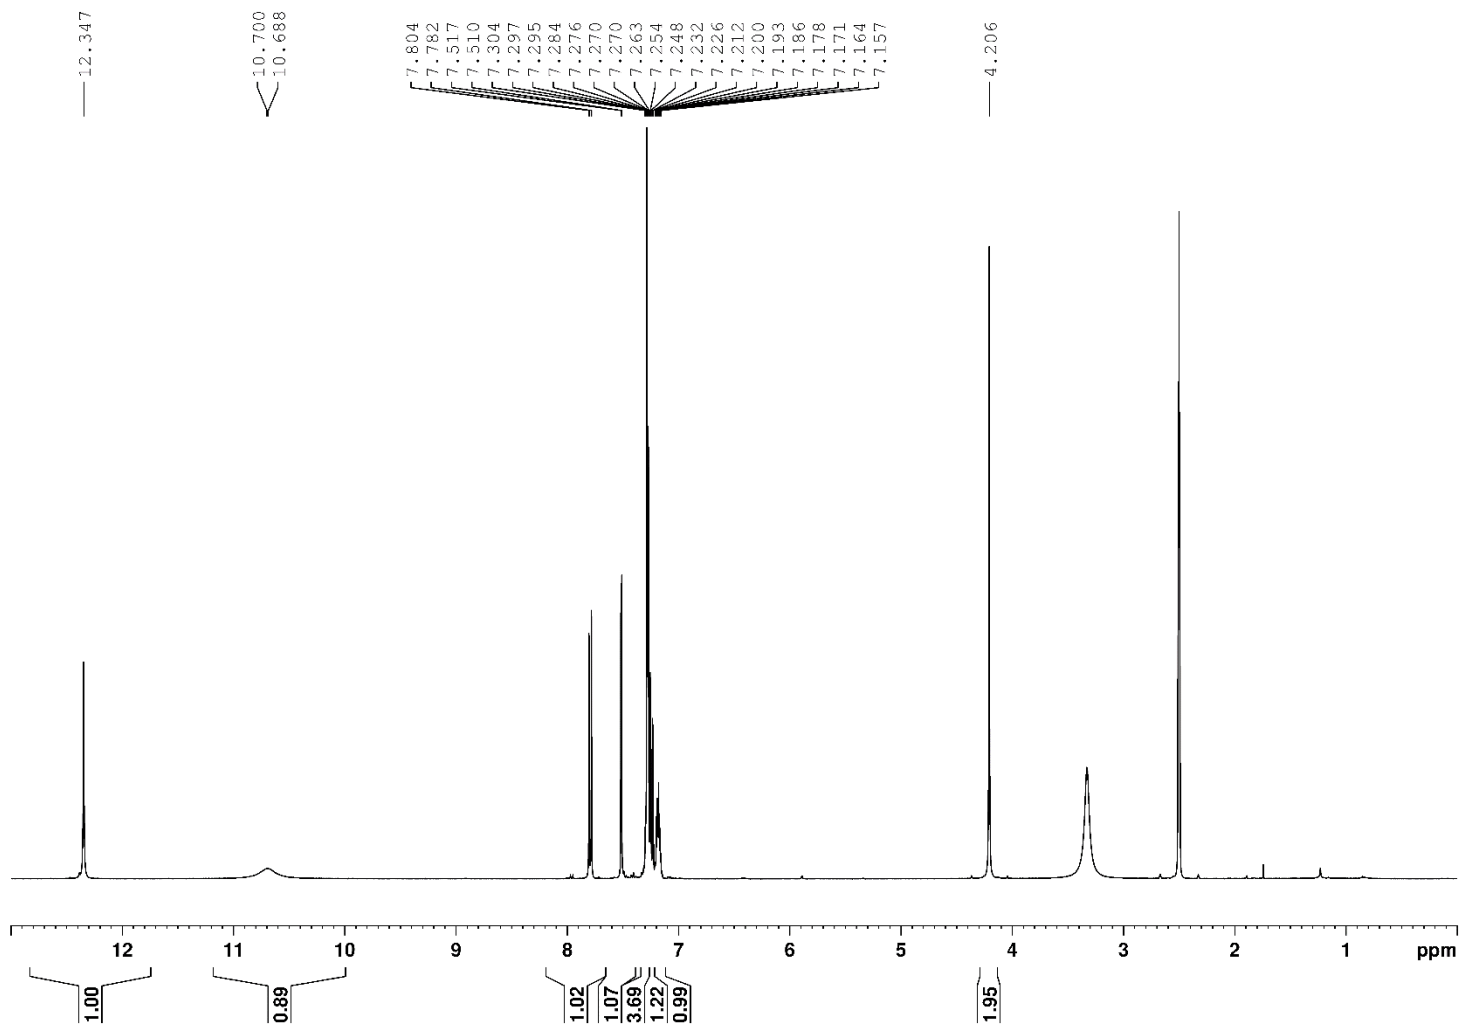

**<sup>13</sup>C NMR (APT) Compound 40**

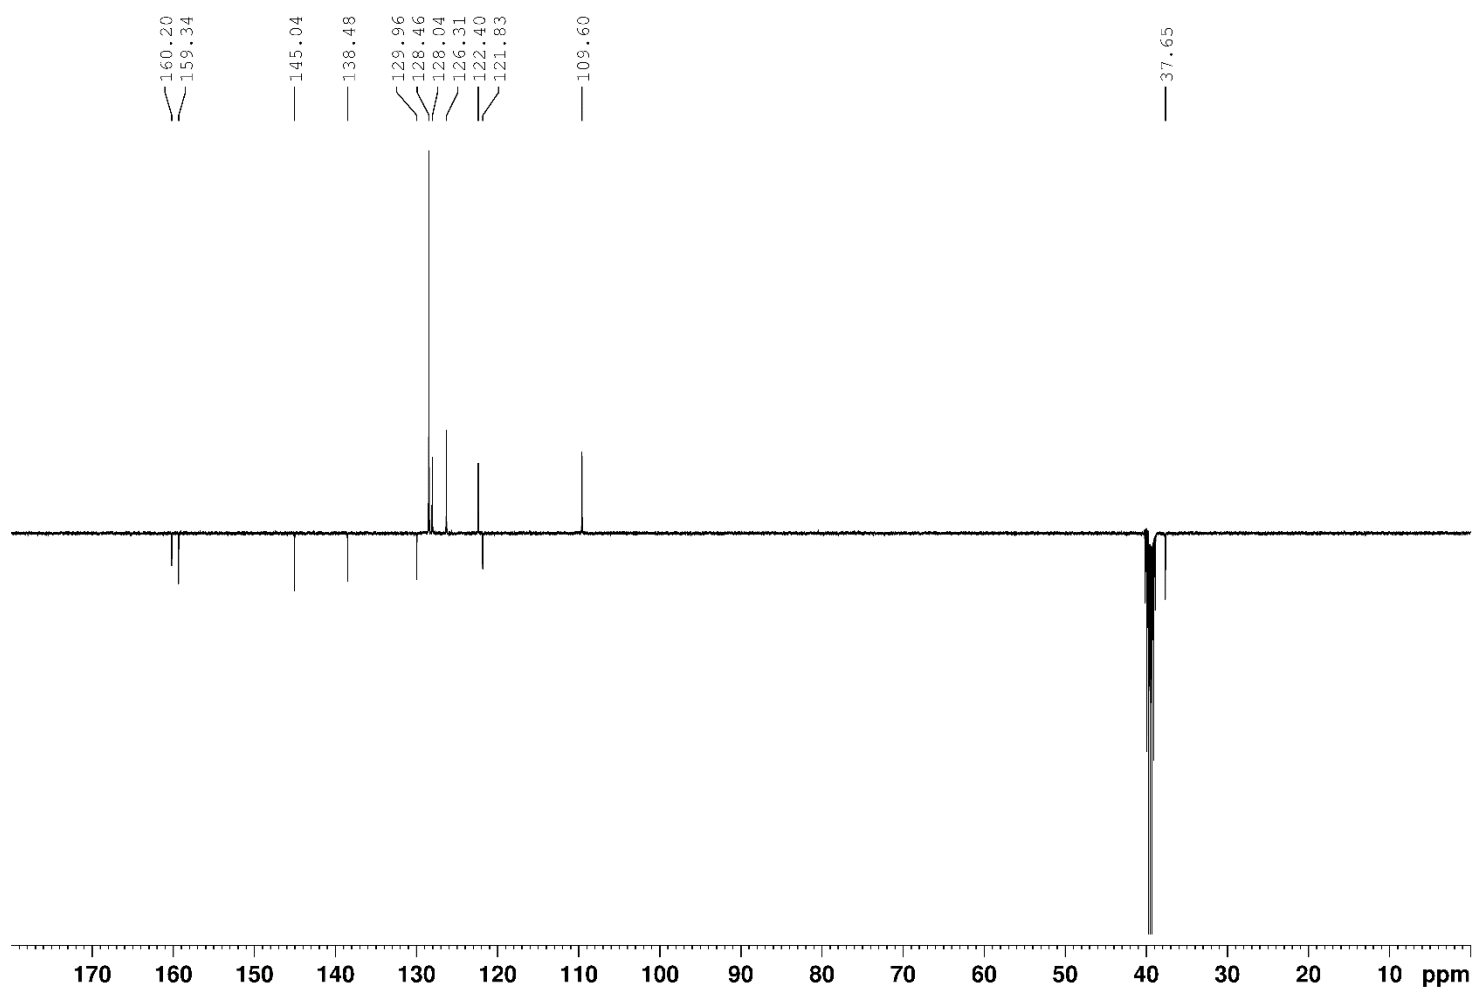

**<sup>1</sup>H NMR Compound 44**

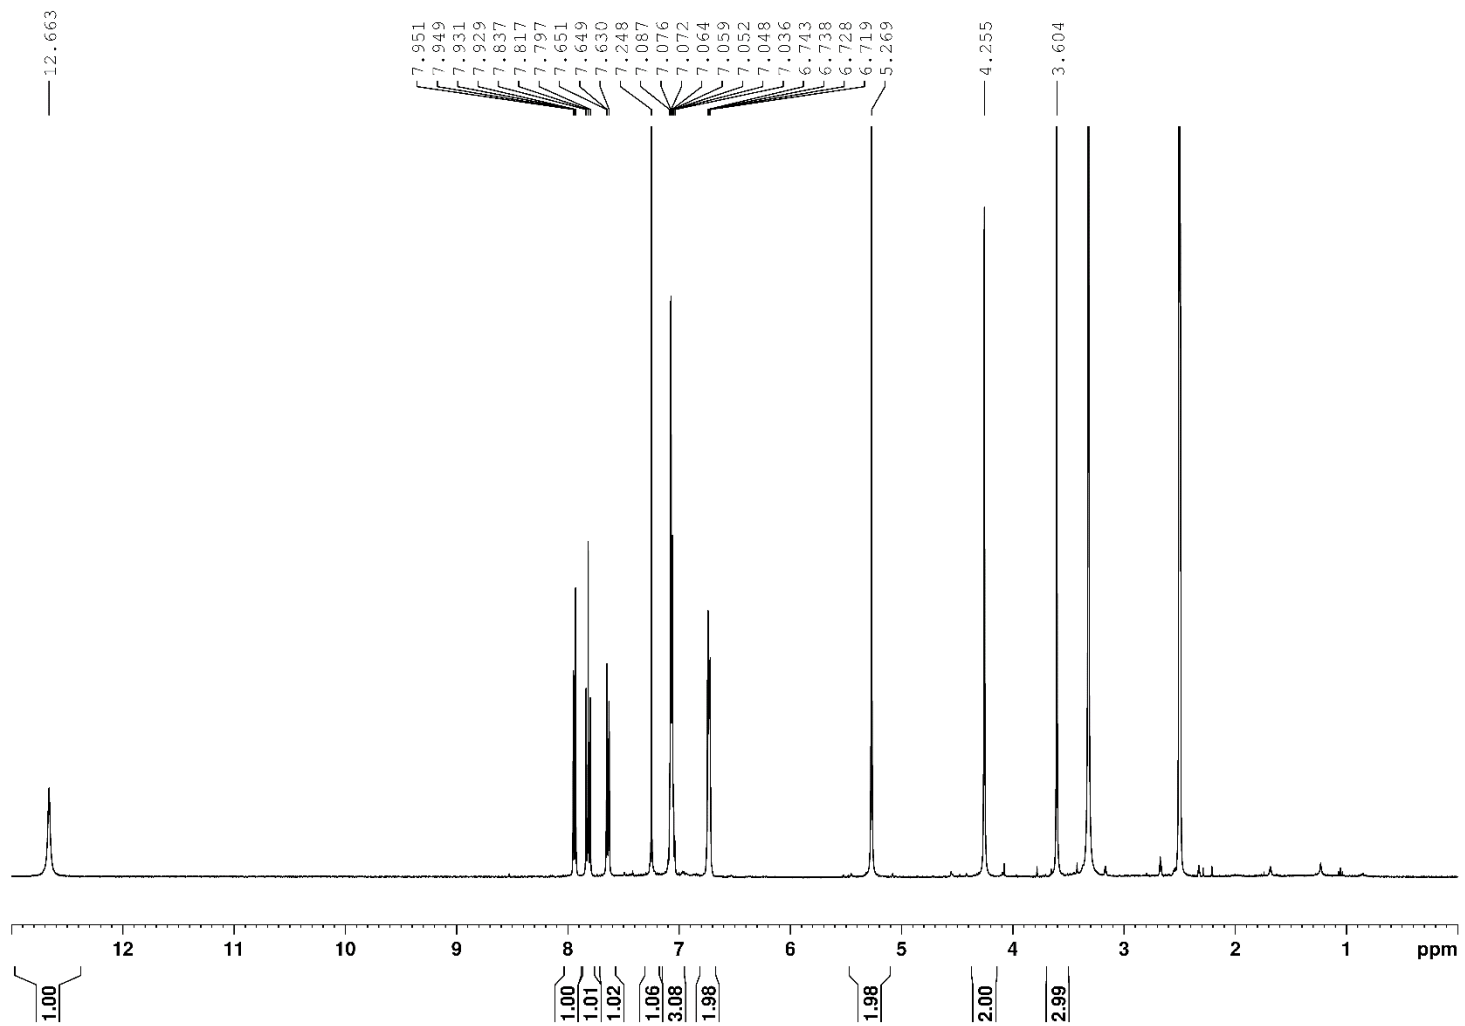

**<sup>13</sup>C NMR Compound 44**

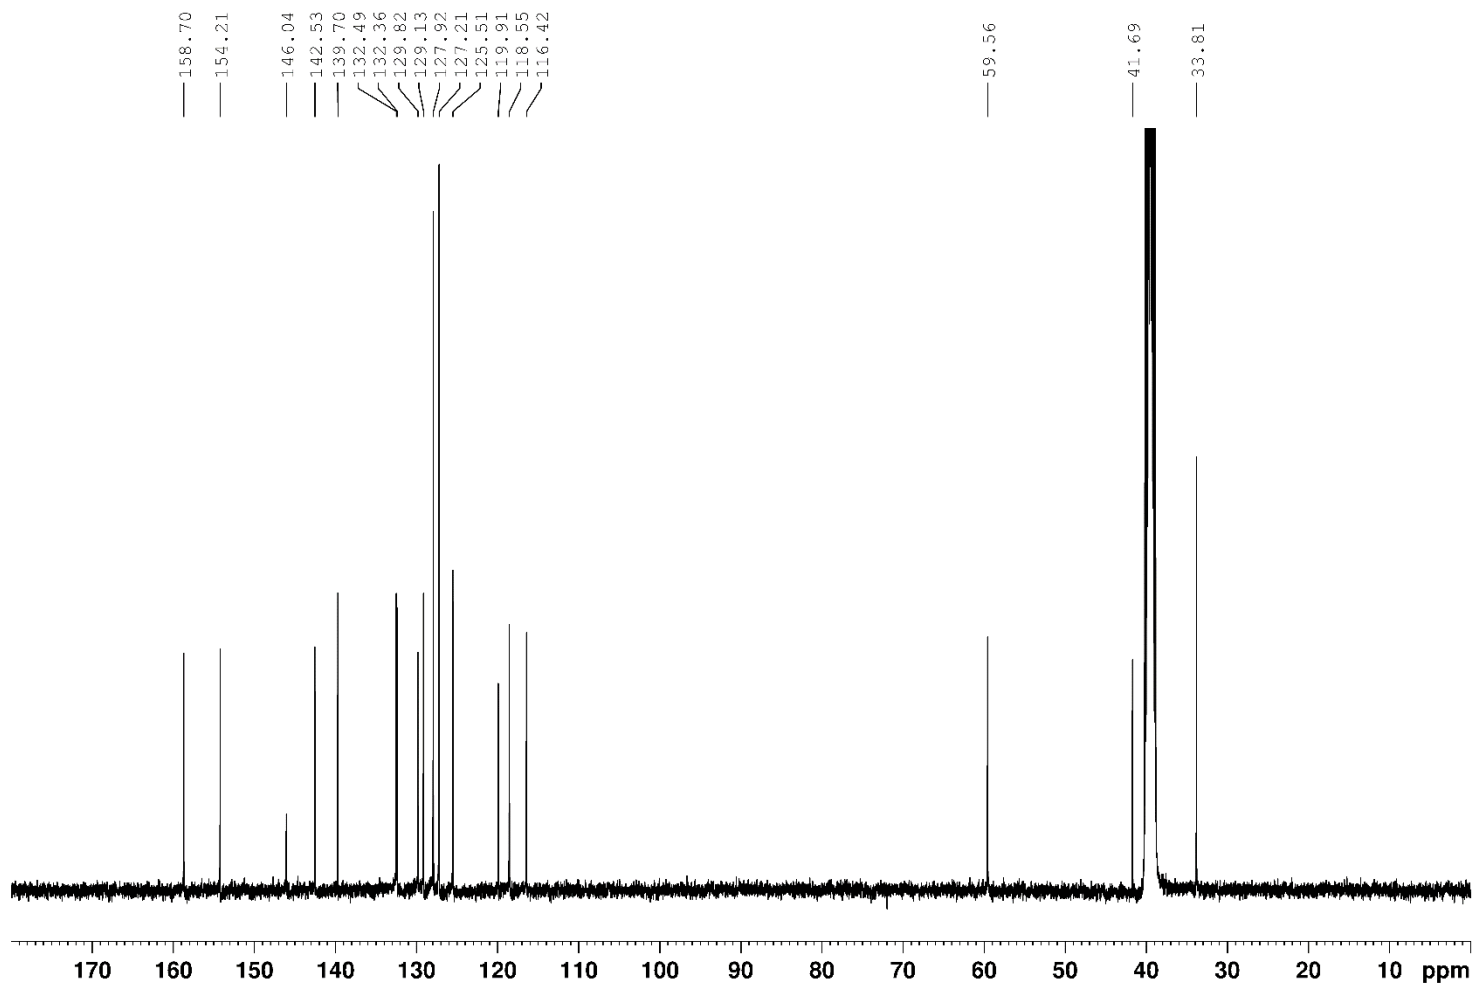

**<sup>1</sup>H NMR Compound 45**

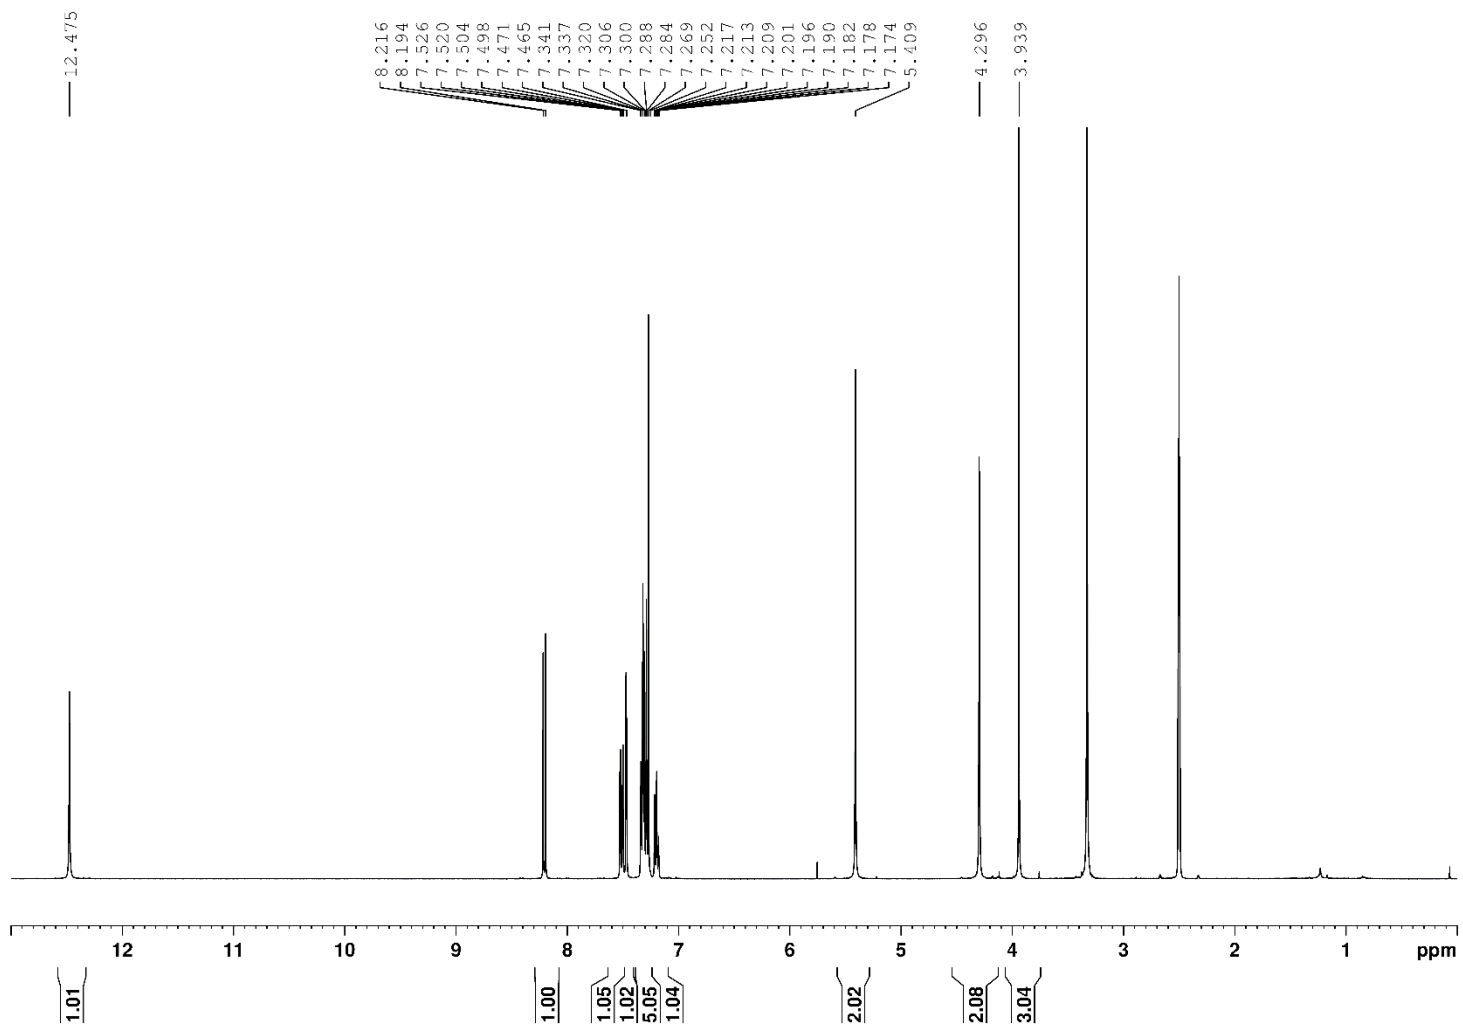

**<sup>13</sup>C NMR (APT) Compound 45**

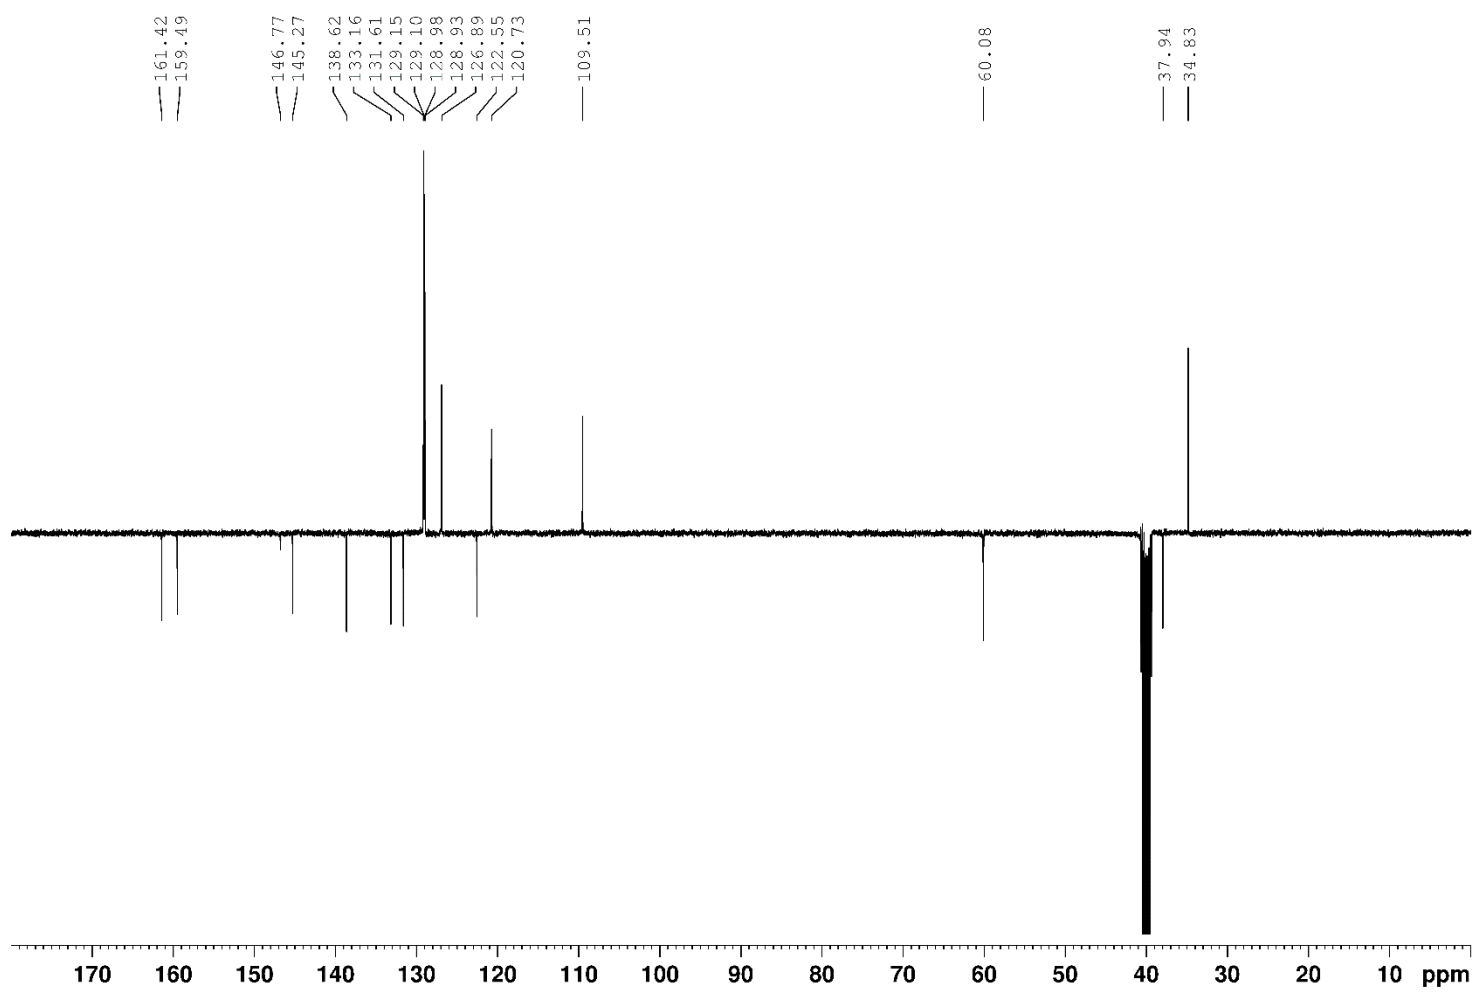

**<sup>1</sup>H NMR Compound 46**

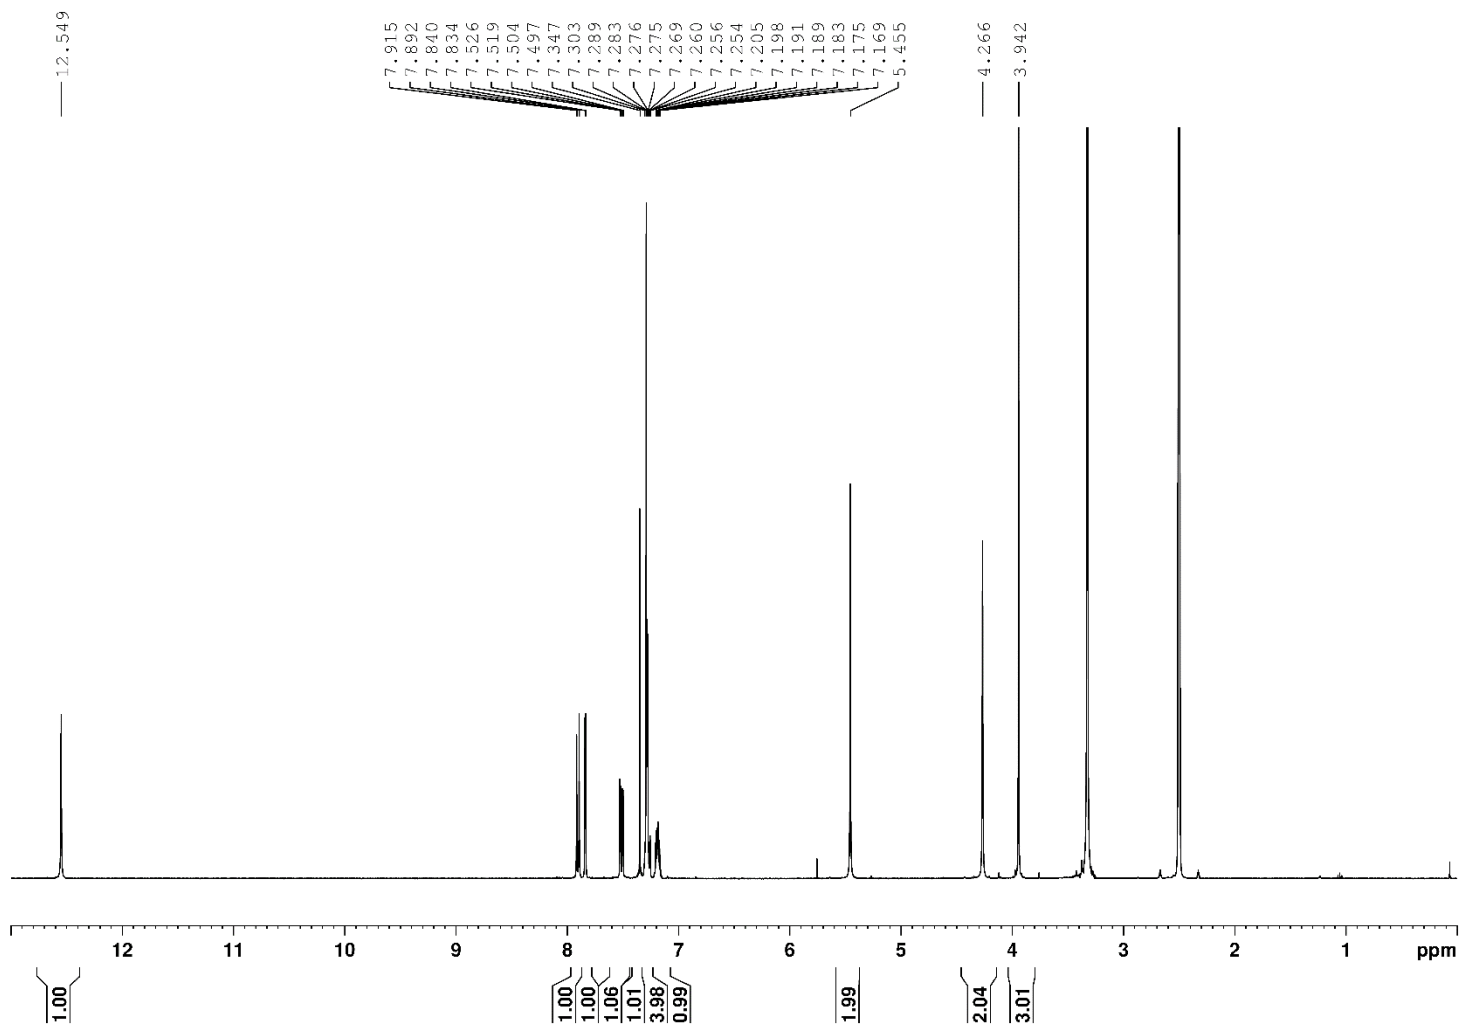



**<sup>13</sup>C NMR (APT) Compound 46**

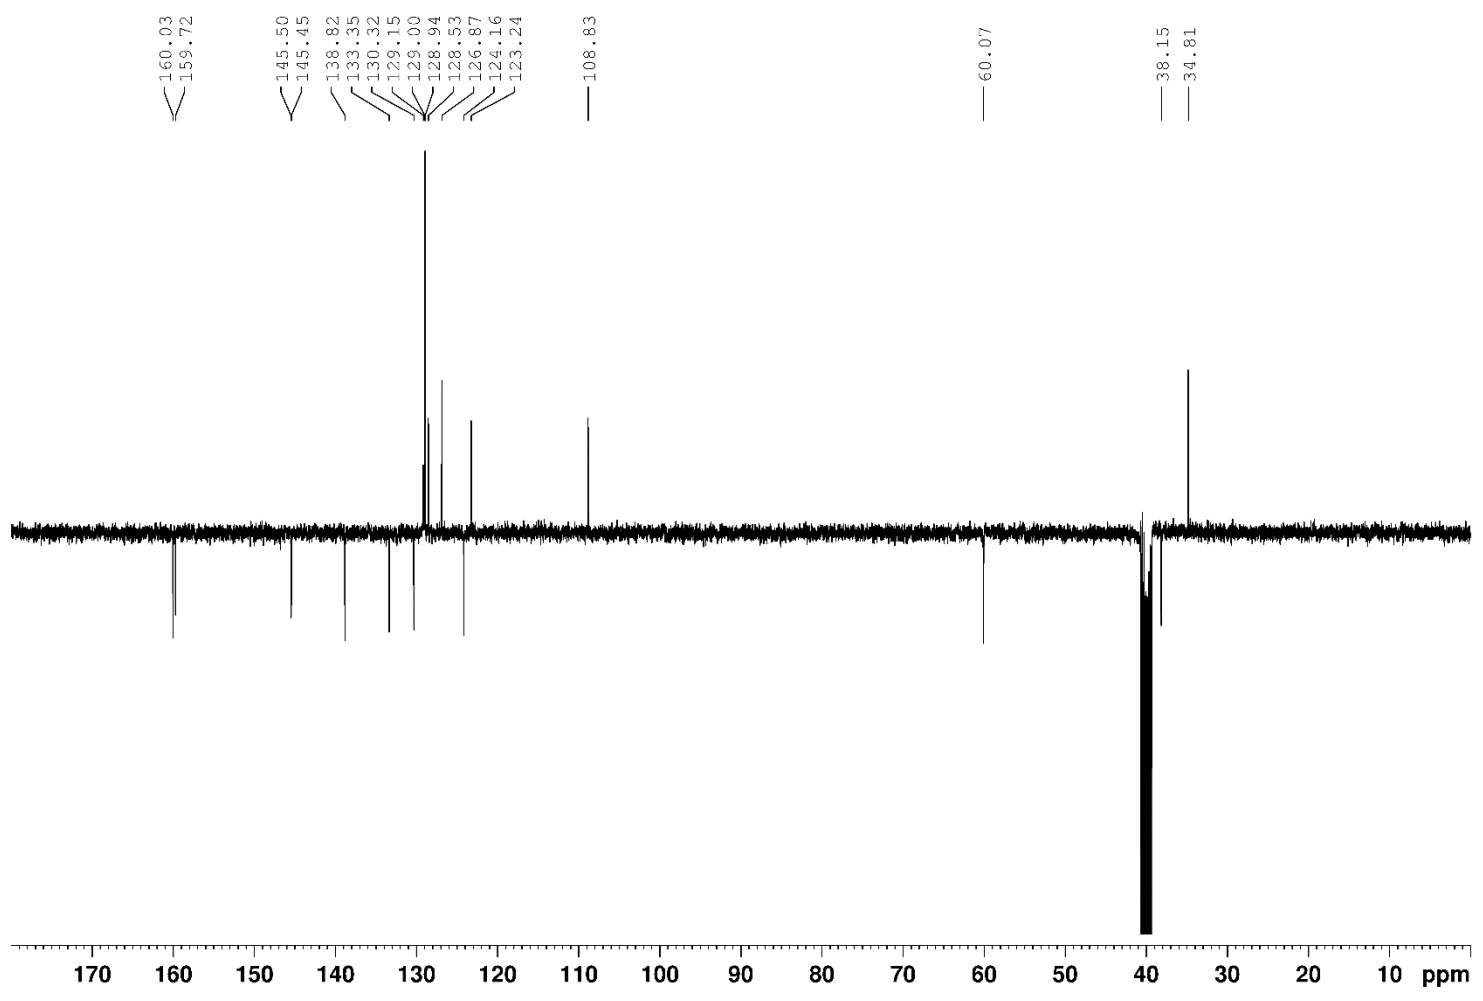

# HPLC Compound 4

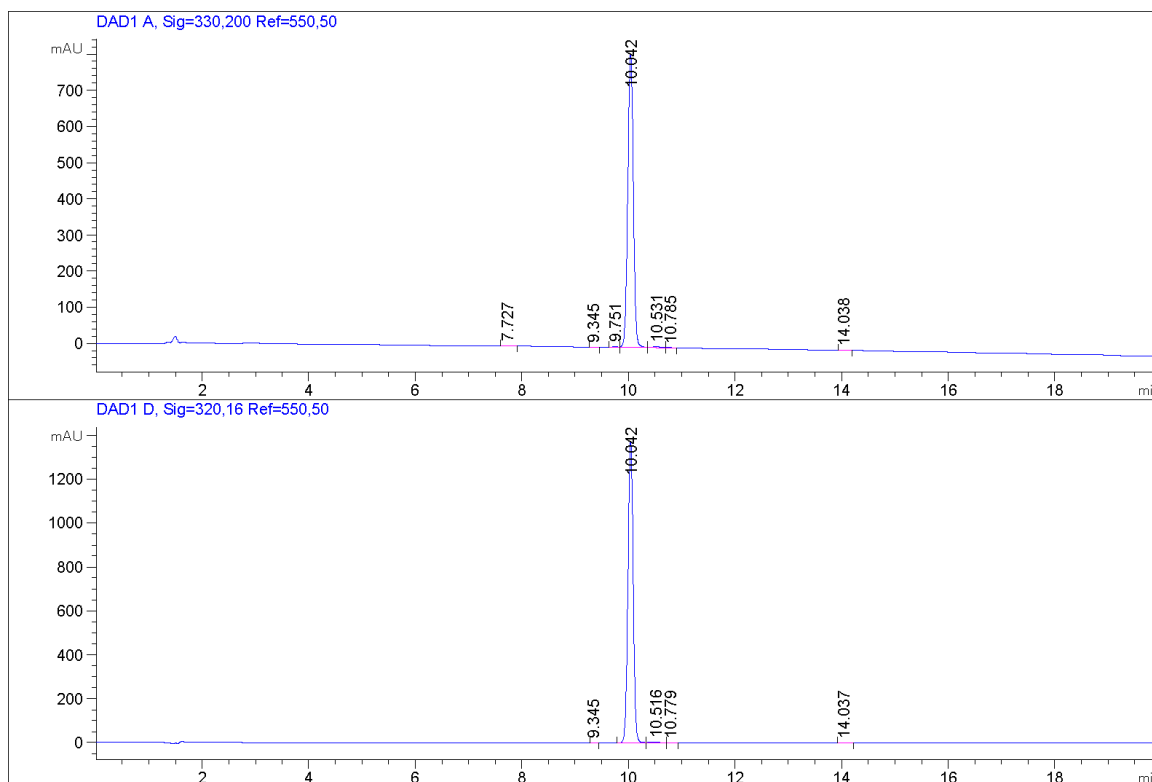

Signal 1: DAD1 A, Sig=330,200 Ref=550,50

Signal 2: DAD1 D, Sig=320,16 Ref=550,50

| Peak # | RetTime [min] | Type | Width [min] | Area [mAU*s] | Height [mAU] | Area %  | Peak #   | RetTime [min] | Type | Width [min] | Area [mAU*s] | Height [mAU] | Area %  |
|--------|---------------|------|-------------|--------------|--------------|---------|----------|---------------|------|-------------|--------------|--------------|---------|
| 1      | 7.727         | BB   | 0.1075      | 11.75733     | 1.72611      | 0.2005  | 1        | 9.345         | MM   | 0.0761      | 1.07070      | 2.34443e-1   | 0.0115  |
| 2      | 9.345         | MM   | 0.0965      | 1.81819      | 3.13892e-1   | 0.0310  | 2        | 10.042        | FM   | 0.1116      | 9257.09277   | 1382.00073   | 99.2618 |
| 3      | 9.751         | MF   | 0.1037      | 12.87006     | 2.06860      | 0.2195  | 3        | 10.516        | FM   | 0.2158      | 58.51730     | 4.52041      | 0.6275  |
| 4      | 10.042        | FM   | 0.1183      | 5795.53711   | 816.48138    | 98.8360 | 4        | 10.779        | FM   | 0.1402      | 2.82679      | 3.35930e-1   | 0.0303  |
| 5      | 10.531        | FM   | 0.1721      | 34.71669     | 3.36196      | 0.5921  | 5        | 14.037        | BB   | 0.1016      | 6.42618      | 1.01804      | 0.0689  |
| 6      | 10.785        | FM   | 0.1344      | 2.44897      | 3.03666e-1   | 0.0418  |          |               |      |             |              |              |         |
| 7      | 14.038        | MM   | 0.1091      | 4.64618      | 7.09625e-1   | 0.0792  | Totals : |               |      |             | 9325.93374   | 1388.10956   |         |

Totals : 5863.79452 824.96523

# HPLC Compound 5

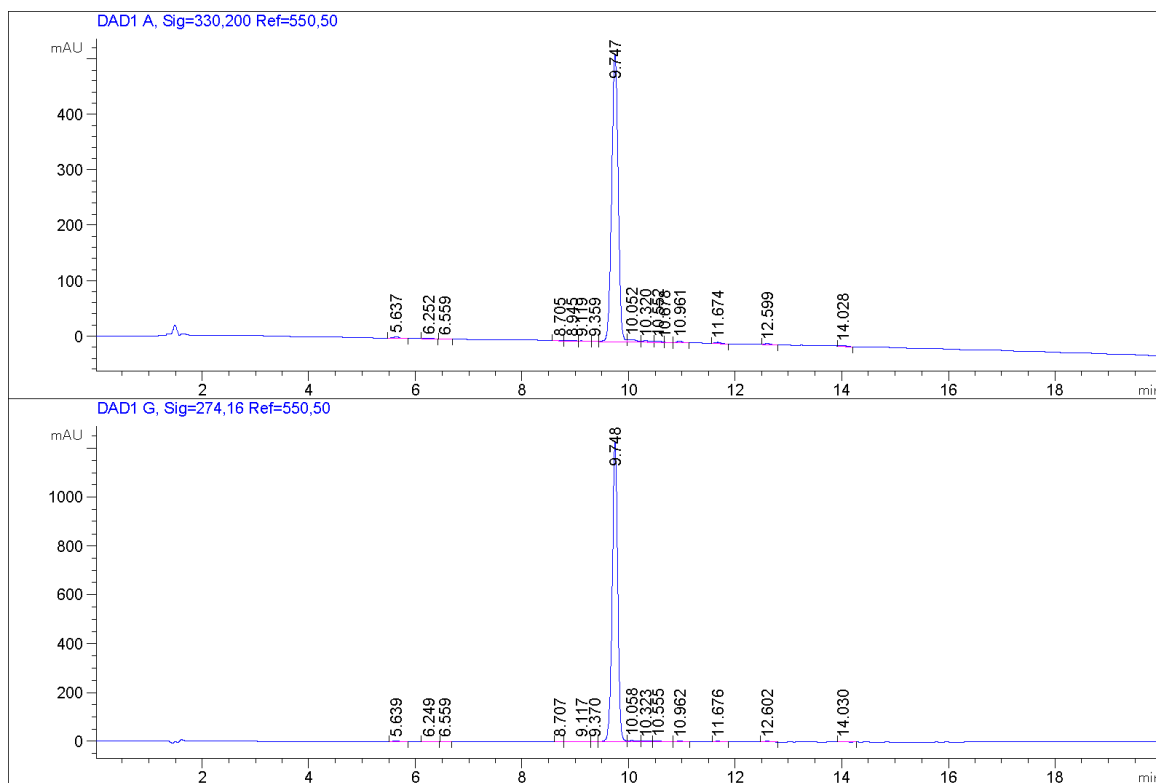

Signal 1: DAD1 A, Sig=330,200 Ref=550,50

Signal 2: DAD1 G, Sig=274,16 Ref=550,50

| Peak #   | RetTime [min] | Type | Width [min] | Area [mAU*s] | Height [mAU] | Area %  | Peak #   | RetTime [min] | Type | Width [min] | Area [mAU*s] | Height [mAU] | Area %  |
|----------|---------------|------|-------------|--------------|--------------|---------|----------|---------------|------|-------------|--------------|--------------|---------|
| 1        | 5.637         | BB   | 0.1198      | 18.18447     | 2.31092      | 0.3966  | 1        | 5.639         | BB   | 0.1209      | 17.07057     | 2.24046      | 0.1890  |
| 2        | 6.252         | MM   | 0.1170      | 2.55232      | 3.63564e-1   | 0.0557  | 2        | 6.249         | BB   | 0.1169      | 9.17972      | 1.20413      | 0.1016  |
| 3        | 6.559         | MM   | 0.1160      | 1.52749      | 2.19373e-1   | 0.0333  | 3        | 6.559         | MM   | 0.1083      | 1.30608      | 2.00913e-1   | 0.0145  |
| 4        | 8.705         | MF   | 0.1096      | 4.48760      | 6.82128e-1   | 0.0979  | 4        | 8.707         | MF   | 0.1043      | 4.55193      | 7.27149e-1   | 0.0504  |
| 5        | 8.945         | FM   | 0.2010      | 8.43796      | 6.99805e-1   | 0.1840  | 5        | 9.117         | FM   | 0.3173      | 26.93488     | 1.41493      | 0.2982  |
| 6        | 9.119         | FM   | 0.1943      | 7.88025      | 6.75934e-1   | 0.1719  | 6        | 9.370         | FM   | 0.1256      | 6.65056      | 8.82820e-1   | 0.0736  |
| 7        | 9.359         | FM   | 0.1193      | 4.00252      | 5.59142e-1   | 0.0873  | 7        | 9.748         | FM   | 0.1180      | 8754.33398   | 1236.17505   | 96.9103 |
| 8        | 9.747         | FM   | 0.1399      | 4368.44580   | 520.47461    | 95.2774 | 8        | 10.058        | FM   | 0.1932      | 68.84543     | 5.94036      | 0.7621  |
| 9        | 10.052        | FM   | 0.1808      | 50.56490     | 4.66221      | 1.1028  | 9        | 10.323        | FM   | 0.1521      | 34.15041     | 3.74257      | 0.3780  |
| 10       | 10.320        | FM   | 0.1718      | 31.27438     | 3.03397      | 0.6821  | 10       | 10.555        | FM   | 0.1516      | 40.50114     | 4.45409      | 0.4483  |
| 11       | 10.552        | FM   | 0.1269      | 20.68893     | 2.71728      | 0.4512  | 11       | 10.962        | FM   | 0.1165      | 25.91370     | 3.70673      | 0.2869  |
| 12       | 10.678        | FM   | 0.1035      | 3.70106      | 5.95917e-1   | 0.0807  | 12       | 11.676        | BB   | 0.1026      | 16.95728     | 2.65300      | 0.1877  |
| 13       | 10.961        | FM   | 0.1119      | 21.59909     | 3.21784      | 0.4711  | 13       | 12.602        | BB   | 0.1042      | 16.34636     | 2.50260      | 0.1810  |
| 14       | 11.674        | BB   | 0.1031      | 15.15764     | 2.35580      | 0.3306  | 14       | 14.030        | VB   | 0.1008      | 10.69770     | 1.62559      | 0.1184  |
| 15       | 12.599        | BB   | 0.1033      | 13.79095     | 2.13716      | 0.3008  |          |               |      |             |              |              |         |
| 16       | 14.028        | VB   | 0.1035      | 12.67939     | 1.86152      | 0.2765  |          |               |      |             |              |              |         |
| Totals : |               |      |             | 4584.97476   | 546.56716    |         | Totals : |               |      |             | 9033.43974   | 1267.47039   |         |

# HPLC Compound 6

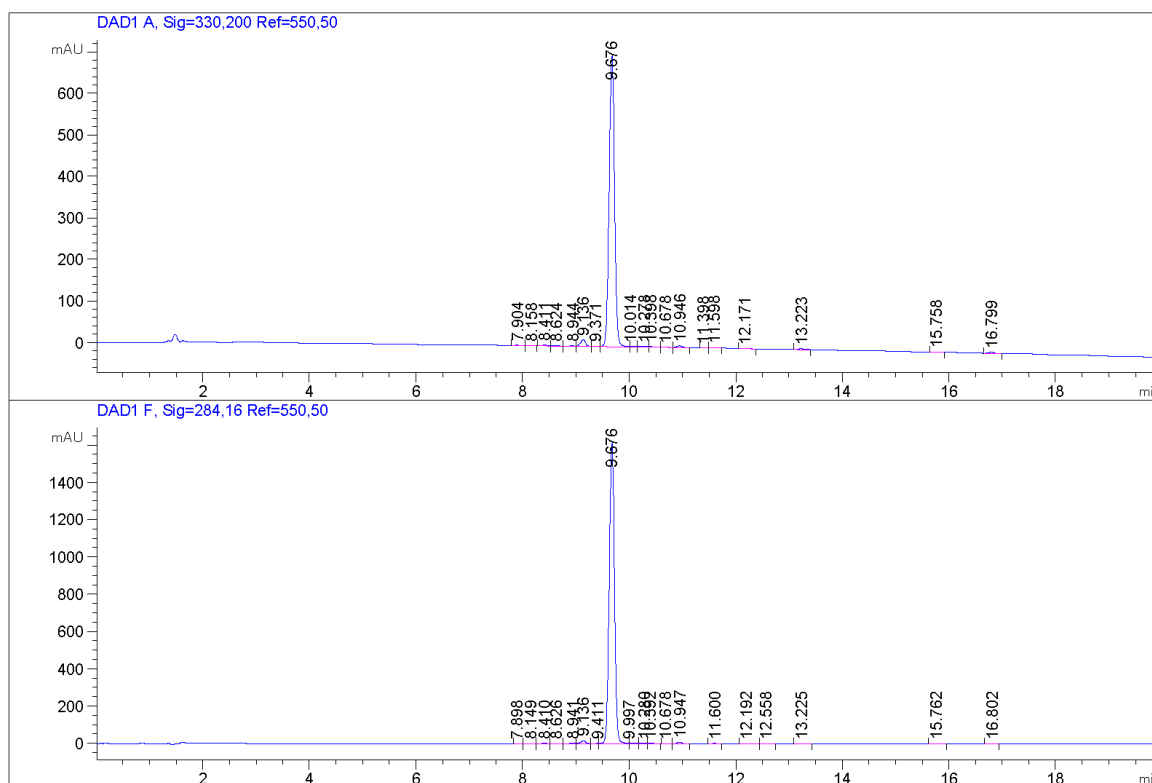

Signal 1: DAD1 A, Sig=330,200 Ref=550,50

Signal 2: DAD1 F, Sig=284,16 Ref=550,50

| Peak # | RetTime [min] | Type | Width [min] | Area [mAU*s] | Height [mAU] | Area %  | Peak # | RetTime [min] | Type | Width [min] | Area [mAU*s] | Height [mAU] | Area %  |
|--------|---------------|------|-------------|--------------|--------------|---------|--------|---------------|------|-------------|--------------|--------------|---------|
| 1      | 7.904         | MM   | 0.1058      | 3.56522      | 5.61768e-1   | 0.0687  | 1      | 7.898         | MF   | 0.0950      | 2.81639      | 4.93872e-1   | 0.0249  |
| 2      | 8.158         | MM   | 0.0890      | 1.69985      | 3.18470e-1   | 0.0328  | 2      | 8.149         | MF   | 0.1041      | 4.76618      | 7.62986e-1   | 0.0422  |
| 3      | 8.411         | MF   | 0.1062      | 9.62270      | 1.50996      | 0.1855  | 3      | 8.410         | MF   | 0.1038      | 18.66243     | 2.99531      | 0.1651  |
| 4      | 8.624         | MF   | 0.1403      | 7.09010      | 8.42230e-1   | 0.1367  | 4      | 8.626         | MF   | 0.1598      | 15.93376     | 1.66199      | 0.1409  |
| 5      | 8.944         | MF   | 0.1677      | 9.22324      | 9.16861e-1   | 0.1778  | 5      | 8.941         | MF   | 0.1805      | 22.94137     | 2.11889      | 0.2029  |
| 6      | 9.136         | MF   | 0.1090      | 102.09525    | 15.60889     | 1.9683  | 6      | 9.136         | MF   | 0.1159      | 105.27835    | 15.13420     | 0.9311  |
| 7      | 9.371         | MF   | 0.1487      | 6.69319      | 7.50134e-1   | 0.1290  | 7      | 9.411         | MF   | 0.1278      | 11.91934     | 1.55384      | 0.1054  |
| 8      | 9.676         | MF   | 0.1169      | 4938.46582   | 704.11267    | 95.2086 | 8      | 9.676         | MF   | 0.1128      | 1.09623e4    | 1619.64441   | 96.9532 |
| 9      | 10.014        | MF   | 0.1146      | 8.69852      | 1.26477      | 0.1677  | 9      | 9.997         | MF   | 0.1059      | 23.70437     | 2.70946      | 0.2096  |
| 10     | 10.278        | MF   | 0.1619      | 13.22692     | 1.36150      | 0.2550  | 10     | 10.280        | MF   | 0.1462      | 22.48327     | 2.56251      | 0.1988  |
| 11     | 10.398        | MF   | 0.1015      | 5.62420      | 9.23731e-1   | 0.1084  | 11     | 10.392        | FM   | 0.1194      | 15.94146     | 2.22541      | 0.1410  |
| 12     | 10.678        | FM   | 0.1073      | 2.05109      | 3.18719e-1   | 0.0395  | 12     | 10.678        | MM   | 0.0987      | 4.42833      | 7.47463e-1   | 0.0392  |
| 13     | 10.946        | MM   | 0.1055      | 26.32039     | 4.15735      | 0.5074  | 13     | 10.947        | MM   | 0.1084      | 49.07473     | 7.54863      | 0.4340  |
| 14     | 11.398        | MF   | 0.1065      | 1.04640      | 1.63762e-1   | 0.0202  | 14     | 11.600        | FM   | 0.1045      | 14.59027     | 2.32761      | 0.1290  |
| 15     | 11.598        | MF   | 0.1069      | 8.37694      | 1.30620      | 0.1615  | 15     | 12.192        | MF   | 0.1632      | 6.09994      | 6.23080e-1   | 0.0539  |
| 16     | 12.171        | MM   | 0.1441      | 5.03327      | 5.81958e-1   | 0.0970  | 16     | 12.558        | FM   | 0.1201      | 1.60356      | 2.22454e-1   | 0.0142  |
| 17     | 13.223        | BB   | 0.1137      | 19.45991     | 2.64942      | 0.3752  | 17     | 13.225        | BB   | 0.1241      | 11.58981     | 1.40744      | 0.1025  |
| 18     | 15.758        | MM   | 0.1121      | 4.08571      | 6.07180e-1   | 0.0788  | 18     | 15.762        | BB   | 0.1117      | 7.97025      | 1.11108      | 0.0705  |
| 19     | 16.799        | BB   | 0.1133      | 14.61656     | 1.99864      | 0.2818  | 19     | 16.802        | MM   | 0.1120      | 4.68887      | 6.97820e-1   | 0.0415  |

Totals : 5186.99528 739.95421

Totals : 1.13068e4 1666.54845

# HPLC Compound 7

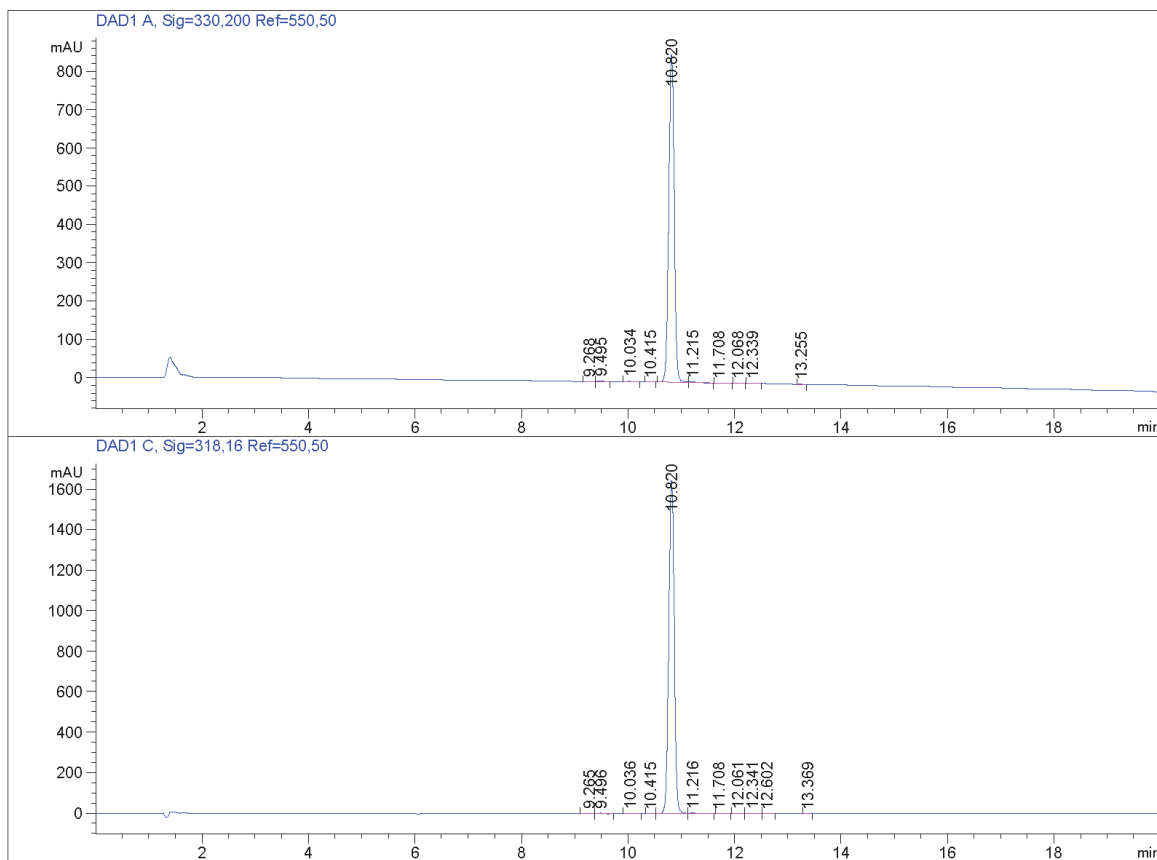

Signal 1: DAD1 A, Sig=330,200 Ref=550,50

Signal 2: DAD1 C, Sig=318,16 Ref=550,50

| Peak # | RetTime [min] | Type | Width [min] | Area [mAU*s] | Height [mAU] | Area %  | Peak # | RetTime [min] | Type | Width [min] | Area [mAU*s] | Height [mAU] | Area %  |
|--------|---------------|------|-------------|--------------|--------------|---------|--------|---------------|------|-------------|--------------|--------------|---------|
| 1      | 9.268         | MF   | 0.1311      | 1.72087      | 2.18778e-1   | 0.0282  | 1      | 9.265         | MF   | 0.1260      | 3.46477      | 4.58295e-1   | 0.0295  |
| 2      | 9.495         | FM   | 0.1061      | 10.38393     | 1.63179      | 0.1703  | 2      | 9.496         | FM   | 0.1083      | 19.66725     | 3.02642      | 0.1672  |
| 3      | 10.034        | BB   | 0.1015      | 11.63047     | 1.75014      | 0.1907  | 3      | 10.036        | BB   | 0.1017      | 14.86017     | 2.23210      | 0.1264  |
| 4      | 10.415        | MM   | 0.0966      | 1.62253      | 2.79957e-1   | 0.0266  | 4      | 10.415        | MM   | 0.0908      | 1.63078      | 2.99336e-1   | 0.0139  |
| 5      | 10.820        | MF   | 0.1167      | 6040.02783   | 862.69769    | 99.0406 | 5      | 10.820        | MF   | 0.1170      | 1.16548e4    | 1660.62476   | 99.1099 |
| 6      | 11.215        | FM   | 0.1497      | 18.45611     | 2.05527      | 0.3026  | 6      | 11.216        | FM   | 0.1527      | 34.59153     | 3.77521      | 0.2942  |
| 7      | 11.708        | MM   | 0.1856      | 1.94787      | 1.74941e-1   | 0.0319  | 7      | 11.708        | MM   | 0.1854      | 2.65404      | 2.38527e-1   | 0.0226  |
| 8      | 12.068        | MM   | 0.1110      | 2.32211      | 3.48555e-1   | 0.0381  | 8      | 12.061        | MF   | 0.1158      | 4.50979      | 6.48891e-1   | 0.0384  |
| 9      | 12.339        | MM   | 0.1139      | 8.85413      | 1.29591      | 0.1452  | 9      | 12.341        | MF   | 0.1215      | 18.07388     | 2.48013      | 0.1537  |
| 10     | 13.255        | MM   | 0.0949      | 1.57108      | 2.75791e-1   | 0.0258  | 10     | 12.602        | MF   | 0.1768      | 3.25558      | 3.06947e-1   | 0.0277  |
|        |               |      |             |              |              |         | 11     | 13.369        | MM   | 0.1004      | 1.96588      | 3.26457e-1   | 0.0167  |

Totals : 6098.53694 870.72882

Totals : 1.17595e4 1674.41707

# HPLC Compound 8

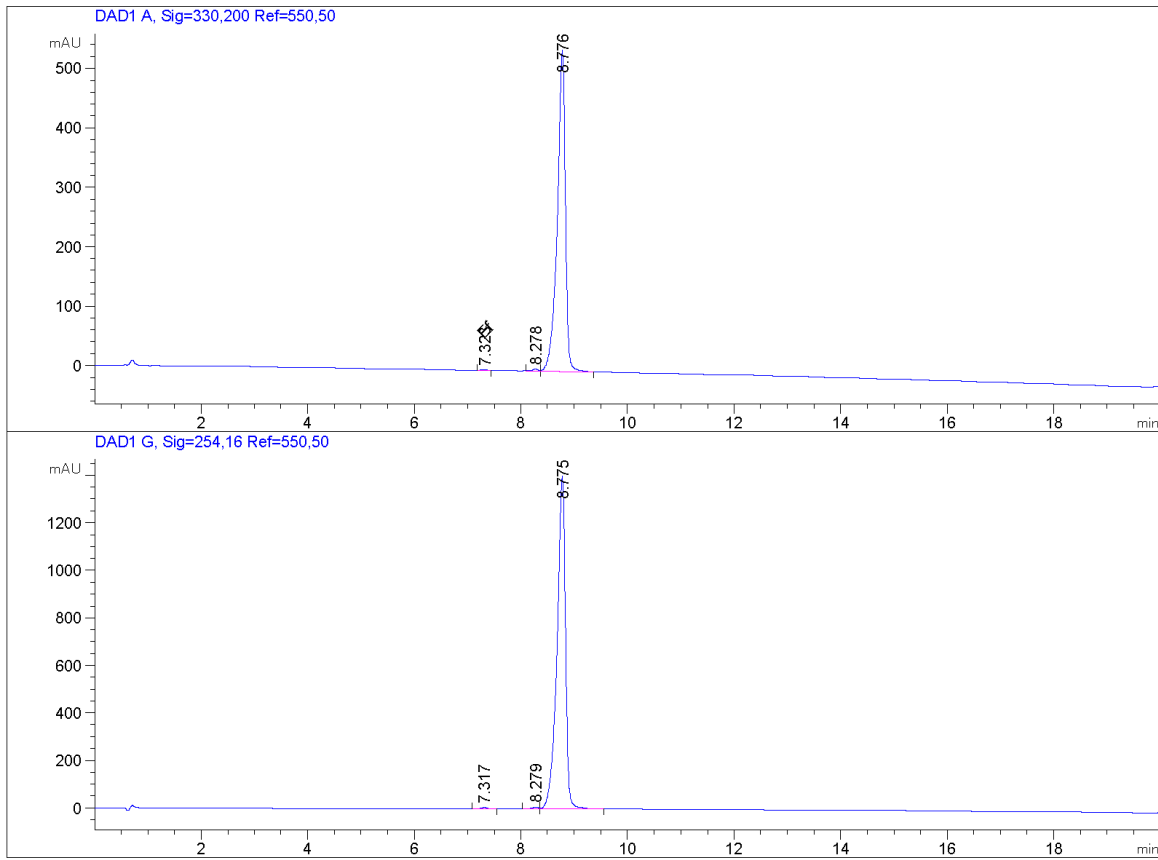

Signal 1: DAD1 A, Sig=330,200 Ref=550,50

Signal 2: DAD1 G, Sig=254,16 Ref=550,50

| Peak # | RetTime [min] | Type | Width [min] | Area [mAU*s] | Height [mAU] | Area %  | Peak # | RetTime [min] | Type | Width [min] | Area [mAU*s] | Height [mAU] | Area %  |
|--------|---------------|------|-------------|--------------|--------------|---------|--------|---------------|------|-------------|--------------|--------------|---------|
| 1      | 7.323         | MM   | 0.1189      | 9.33224      | 1.30863      | 0.1622  | 1      | 7.317         | BB   | 0.1328      | 60.44975     | 6.72714      | 0.3852  |
| 2      | 8.278         | BV   | 0.1316      | 28.16499     | 3.17270      | 0.4896  | 2      | 8.279         | BV   | 0.1316      | 74.70703     | 8.09972      | 0.4761  |
| 3      | 8.776         | VB   | 0.1554      | 5714.62744   | 540.30011    | 99.3481 | 3      | 8.775         | VB   | 0.1655      | 1.55569e4    | 1401.67444   | 99.1387 |

Totals : 5752.12467 544.78144

Totals : 1.56920e4 1416.50129

# HPLC Compound 9

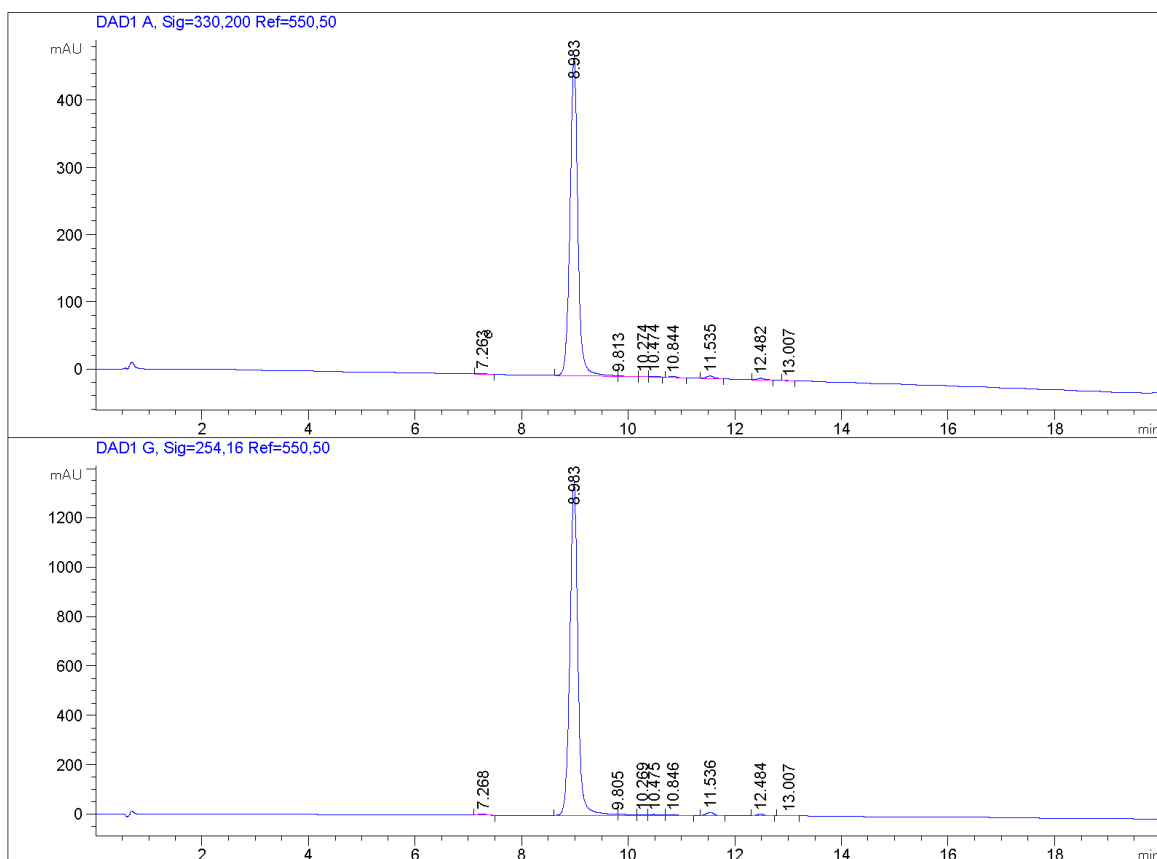

Signal 1: DAD1 A, Sig=330,200 Ref=550,50

Signal 2: DAD1 G, Sig=254,16 Ref=550,50

| Peak # | RetTime [min] | Type | Width [min] | Area [mAU*s] | Height [mAU] | Area %  | Peak # | RetTime [min] | Type | Width [min] | Area [mAU*s] | Height [mAU] | Area %  |
|--------|---------------|------|-------------|--------------|--------------|---------|--------|---------------|------|-------------|--------------|--------------|---------|
| 1      | 7.263         | BB   | 0.1295      | 8.96987      | 1.07332      | 0.1820  | 1      | 7.268         | BB   | 0.1308      | 40.44790     | 4.77439      | 0.2817  |
| 2      | 8.983         | MF   | 0.1688      | 4828.12061   | 476.62775    | 97.9373 | 2      | 8.983         | MF   | 0.1722      | 1.39697e4    | 1352.39001   | 97.2977 |
| 3      | 9.813         | FM   | 0.2027      | 12.75467     | 1.04896      | 0.2587  | 3      | 9.805         | FM   | 0.2368      | 59.56230     | 4.19212      | 0.4148  |
| 4      | 10.274        | FM   | 0.1529      | 5.84979      | 6.37674e-1   | 0.1187  | 4      | 10.269        | FM   | 0.1895      | 29.30147     | 2.57722      | 0.2041  |
| 5      | 10.474        | FM   | 0.1540      | 5.93827      | 6.42651e-1   | 0.1205  | 5      | 10.475        | FM   | 0.2293      | 42.92558     | 3.11965      | 0.2990  |
| 6      | 10.844        | BB   | 0.1257      | 9.83322      | 1.22485      | 0.1995  | 6      | 10.846        | FM   | 0.2061      | 33.09069     | 2.67655      | 0.2305  |
| 7      | 11.535        | BB   | 0.1407      | 37.63882     | 4.03996      | 0.7635  | 7      | 11.536        | BB   | 0.1409      | 120.07300    | 12.86047     | 0.8363  |
| 8      | 12.482        | BB   | 0.1380      | 19.66622     | 2.16490      | 0.3989  | 8      | 12.484        | BB   | 0.1385      | 56.24610     | 6.16137      | 0.3917  |
| 9      | 13.007        | MM   | 0.1230      | 1.03492      | 1.40201e-1   | 0.0210  | 9      | 13.007        | MM   | 0.1886      | 6.34873      | 5.60905e-1   | 0.0442  |

Totals : 4929.80637 487.60025

Totals : 1.43577e4 1389.31268

# HPLC Compound 10

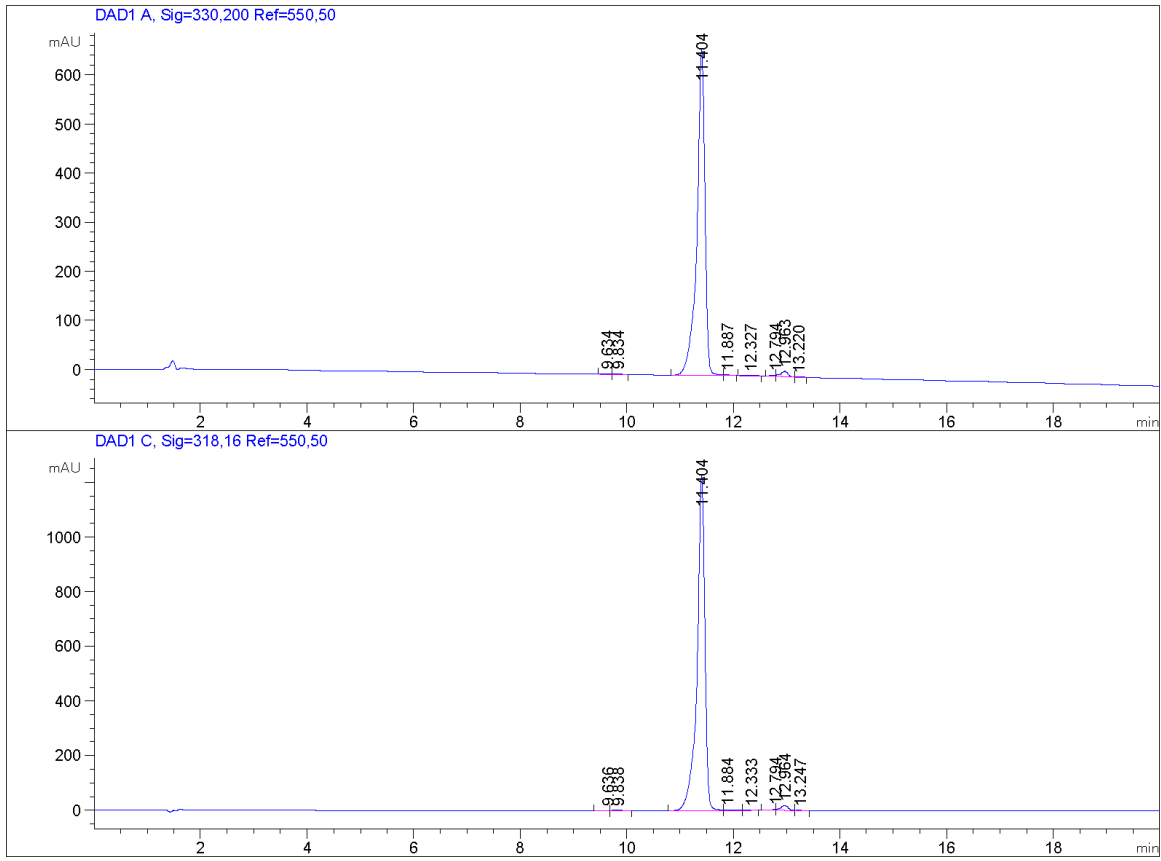

Signal 1: DAD1 A, Sig=330,200 Ref=550,50

Signal 2: DAD1 C, Sig=318,16 Ref=550,50

| Peak # | RetTime [min] | Type | Width [min] | Area [mAU*s] | Height [mAU] | Area %  | Peak # | RetTime [min] | Type | Width [min] | Area [mAU*s] | Height [mAU] | Area %  |
|--------|---------------|------|-------------|--------------|--------------|---------|--------|---------------|------|-------------|--------------|--------------|---------|
| 1      | 9.634         | MF   | 0.1572      | 8.22762      | 8.72504e-1   | 0.1158  | 1      | 9.636         | MF   | 0.1534      | 9.40972      | 1.02234      | 0.0741  |
| 2      | 9.834         | FM   | 0.1465      | 11.18903     | 1.27318      | 0.1575  | 2      | 9.838         | FM   | 0.1651      | 23.41307     | 2.36302      | 0.1843  |
| 3      | 11.404        | MF   | 0.1740      | 6942.24268   | 665.11871    | 97.7168 | 3      | 11.404        | MF   | 0.1681      | 1.24302e4    | 1232.57166   | 97.8354 |
| 4      | 11.887        | FM   | 0.1536      | 13.24840     | 1.43800      | 0.1865  | 4      | 11.884        | FM   | 0.1780      | 33.52730     | 3.13985      | 0.2639  |
| 5      | 12.327        | MM   | 0.2014      | 8.13280      | 6.73106e-1   | 0.1145  | 5      | 12.333        | FM   | 0.1605      | 6.23373      | 6.47303e-1   | 0.0491  |
| 6      | 12.794        | MF   | 0.0899      | 15.13313     | 2.80692      | 0.2130  | 6      | 12.794        | MF   | 0.1031      | 28.55816     | 4.61488      | 0.2248  |
| 7      | 12.963        | FM   | 0.1577      | 102.22871    | 10.80432     | 1.4389  | 7      | 12.964        | FM   | 0.1543      | 170.28780    | 18.39075     | 1.3403  |
| 8      | 13.220        | FM   | 0.1293      | 4.05084      | 5.22011e-1   | 0.0570  | 8      | 13.247        | FM   | 0.1138      | 3.58803      | 5.25305e-1   | 0.0282  |

Totals : 7104.45321 683.50876

Totals : 1.27052e4 1263.27511



# HPLC Compound 11

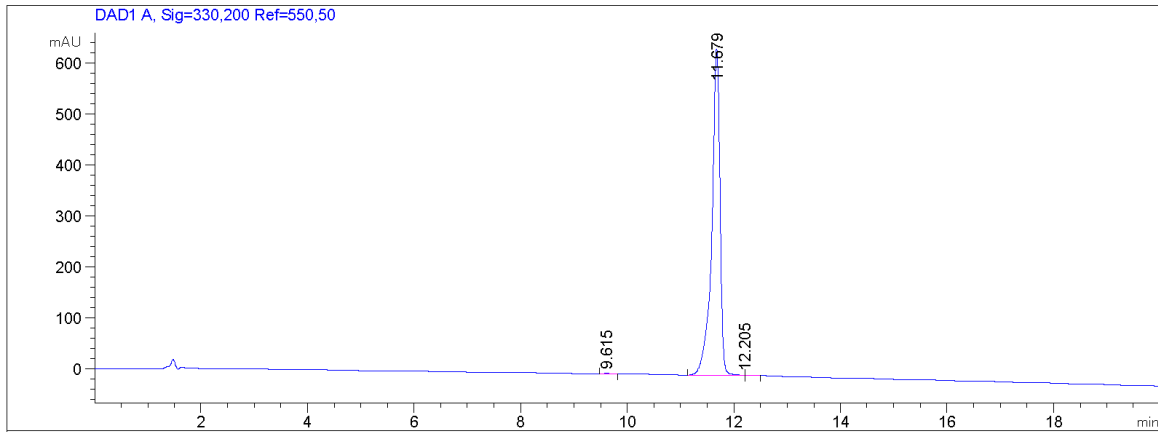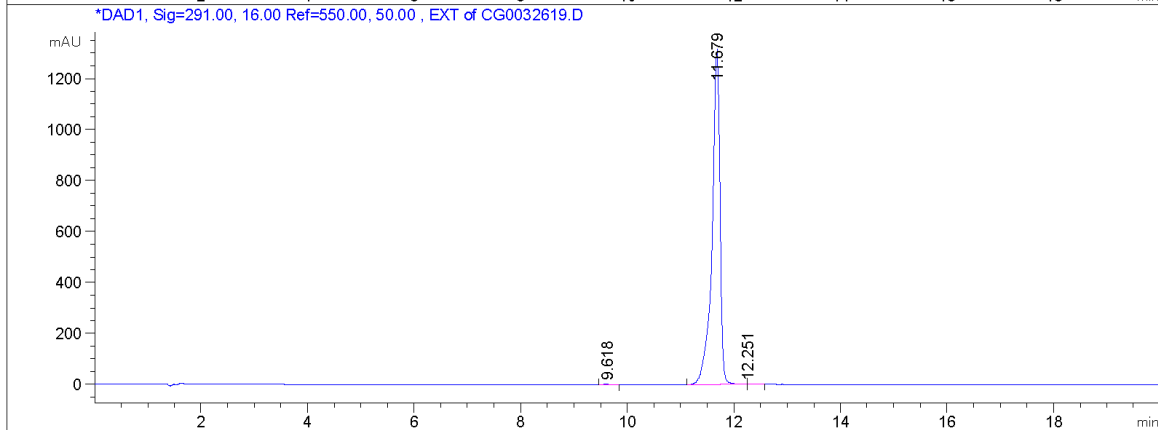

Signal 1: DAD1 A, Sig=330,200 Ref=550,50

Signal 2: DAD1, Sig=291.00, 16.00 Ref=550.00, 50.00, EXT

| Peak # | RetTime [min] | Type | Width [min] | Area [mAU*s] | Height [mAU] | Area %  | Peak # | RetTime [min] | Type | Width [min] | Area [mAU*s] | Height [mAU] | Area %  |
|--------|---------------|------|-------------|--------------|--------------|---------|--------|---------------|------|-------------|--------------|--------------|---------|
| 1      | 9.615         | BB   | 0.1243      | 9.36506      | 1.13425      | 0.1371  | 1      | 9.618         | BB   | 0.1260      | 13.92036     | 1.72773      | 0.1021  |
| 2      | 11.679        | MF   | 0.1767      | 6812.16553   | 642.65698    | 99.7393 | 2      | 11.679        | MF   | 0.1693      | 1.36119e4    | 1340.29089   | 99.8311 |
| 3      | 12.205        | FM   | 0.1469      | 8.43945      | 9.57526e-1   | 0.1236  | 3      | 12.251        | FM   | 0.1198      | 9.11127      | 1.26757      | 0.0668  |

Totals : 6829.97004 644.74876

Totals : 1.36349e4 1343.28619

# HPLC Compound 18

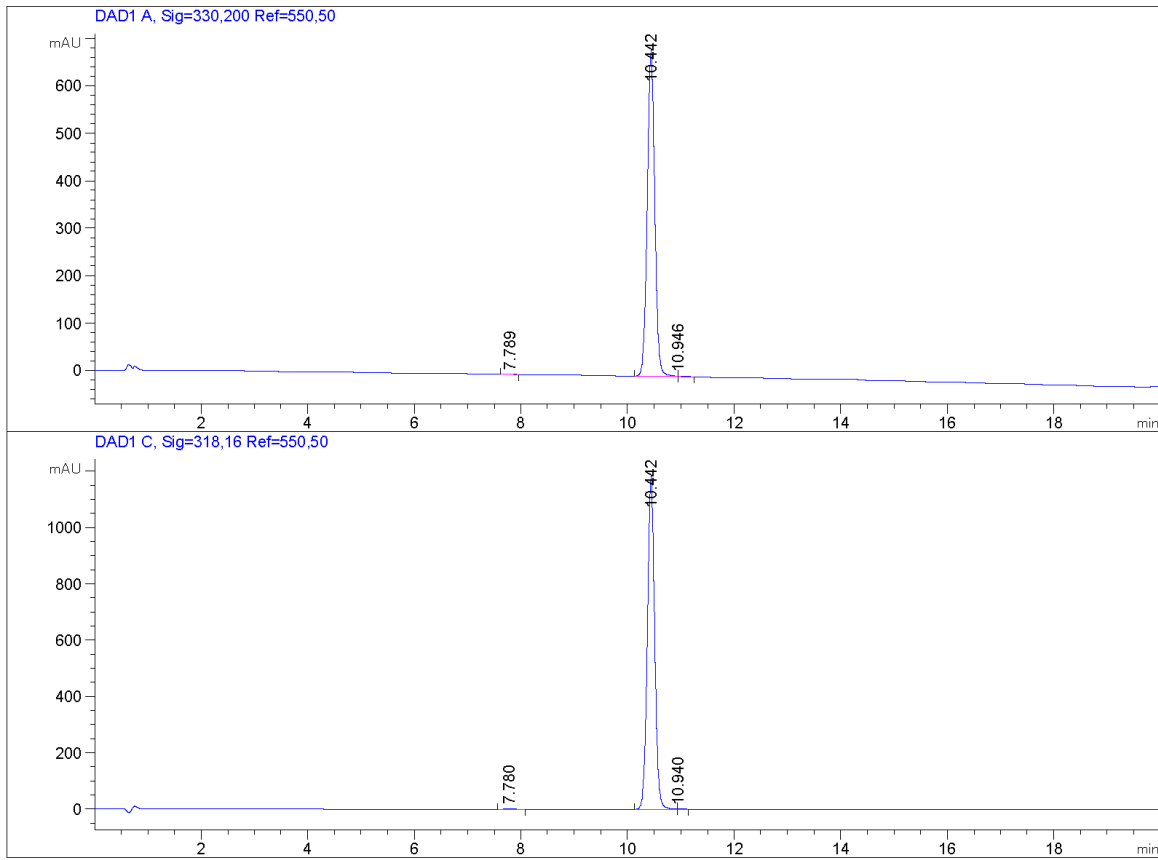

Signal 1: DAD1 A, Sig=330,200 Ref=550,50

Signal 2: DAD1 C, Sig=318,16 Ref=550,50

| Peak # | RetTime [min] | Type | Width [min] | Area [mAU*s] | Height [mAU] | Area %  | Peak # | RetTime [min] | Type | Width [min] | Area [mAU*s] | Height [mAU] | Area %  |
|--------|---------------|------|-------------|--------------|--------------|---------|--------|---------------|------|-------------|--------------|--------------|---------|
| 1      | 7.789         | MM   | 0.1835      | 9.03691      | 8.21007e-1   | 0.1332  | 1      | 7.780         | BB   | 0.1738      | 40.69121     | 3.54754      | 0.3585  |
| 2      | 10.442        | MF   | 0.1636      | 6761.18408   | 688.59430    | 99.6827 | 2      | 10.442        | MF   | 0.1585      | 1.12943e4    | 1187.36853   | 99.5164 |
| 3      | 10.946        | FM   | 0.1363      | 12.48178     | 1.52576      | 0.1840  | 3      | 10.940        | FM   | 0.1463      | 14.18865     | 1.61590      | 0.1250  |

Totals : 6782.70277 690.94107

Totals : 1.13492e4 1192.53197

# HPLC Compound 38

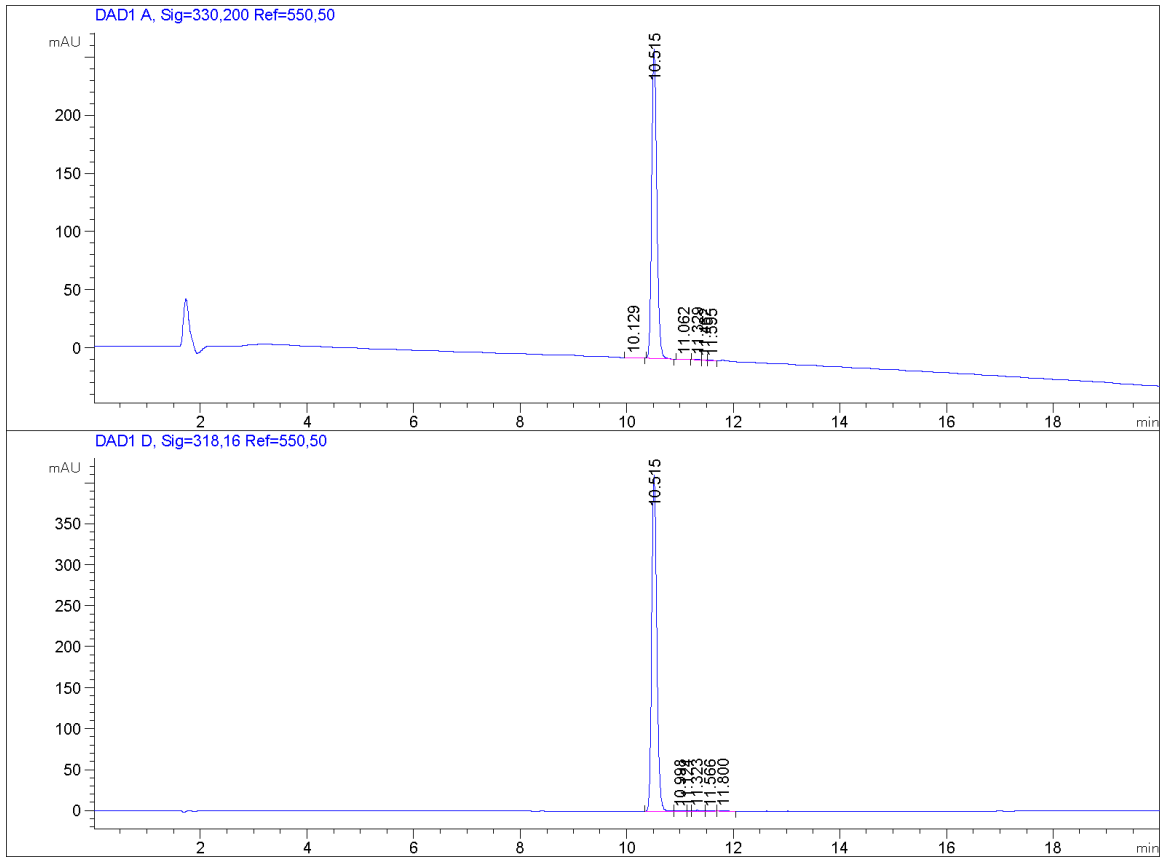

Signal 1: DAD1 A, Sig=330,200 Ref=550,50

Signal 2: DAD1 D, Sig=318,16 Ref=550,50

| Peak # | RetTime [min] | Type | Width [min] | Area [mAU*s] | Height [mAU] | Area %  | Peak # | RetTime [min] | Type | Width [min] | Area [mAU*s] | Height [mAU] | Area %  |
|--------|---------------|------|-------------|--------------|--------------|---------|--------|---------------|------|-------------|--------------|--------------|---------|
| 1      | 10.129        | MM   | 0.1912      | 3.01423      | 2.62811e-1   | 0.1699  | 1      | 10.515        | MF   | 0.1096      | 2707.84473   | 411.59457    | 99.1490 |
| 2      | 10.515        | MM   | 0.1098      | 1759.11926   | 267.06094    | 99.1550 | 2      | 10.998        | FM   | 0.1913      | 4.78554      | 4.16963e-1   | 0.1752  |
| 3      | 11.062        | MM   | 0.1535      | 2.49148      | 2.70486e-1   | 0.1404  | 3      | 11.124        | FM   | 0.0805      | 1.12226      | 2.32425e-1   | 0.0411  |
| 4      | 11.329        | MF   | 0.1030      | 4.45789      | 7.21103e-1   | 0.2513  | 4      | 11.323        | FM   | 0.1206      | 9.17852      | 1.26862      | 0.3361  |
| 5      | 11.462        | MF   | 0.1073      | 1.93765      | 3.01009e-1   | 0.1092  | 5      | 11.566        | FM   | 0.1069      | 3.25396      | 5.07408e-1   | 0.1191  |
| 6      | 11.595        | FM   | 0.1050      | 3.08968      | 4.90312e-1   | 0.1742  | 6      | 11.800        | MM   | 0.1068      | 4.90164      | 7.64929e-1   | 0.1795  |

Totals : 1774.11019 269.10666

Totals : 2731.08664 414.78491

# HPLC Compound 39

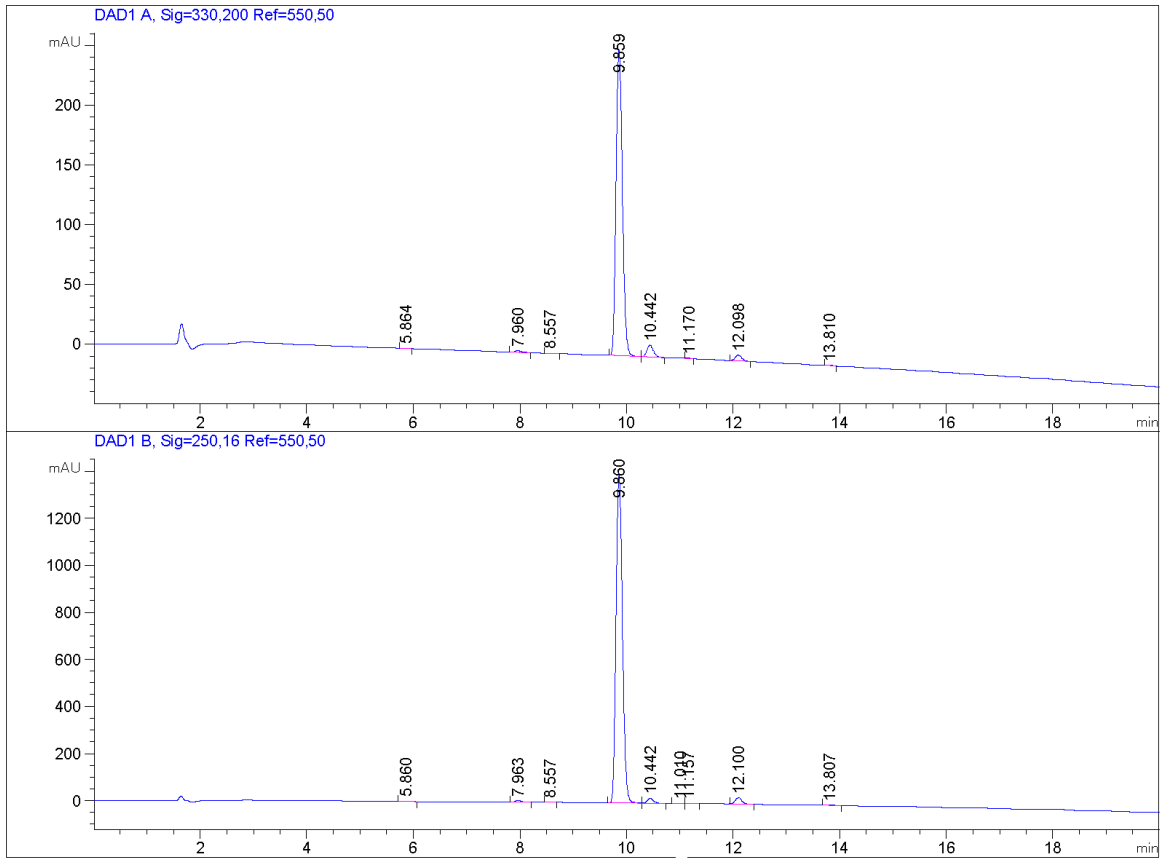

Signal 1: DAD1 A, Sig=330,200 Ref=550,50

Signal 2: DAD1 B, Sig=250,16 Ref=550,50

| Peak # | RetTime [min] | Type | Width [min] | Area [mAU*s] | Height [mAU] | Area %  | Peak # | RetTime [min] | Type | Width [min] | Area [mAU*s] | Height [mAU] | Area %  |
|--------|---------------|------|-------------|--------------|--------------|---------|--------|---------------|------|-------------|--------------|--------------|---------|
| 1      | 5.864         | MM   | 0.1141      | 1.00763      | 1.47135e-1   | 0.0447  | 1      | 5.860         | BB   | 0.1407      | 9.77839      | 1.01236      | 0.0812  |
| 2      | 7.960         | MM   | 0.1354      | 10.89578     | 1.34153      | 0.4832  | 2      | 7.963         | BB   | 0.1250      | 56.95283     | 7.14178      | 0.4731  |
| 3      | 8.557         | MM   | 0.1359      | 1.90896      | 2.34164e-1   | 0.0847  | 3      | 8.557         | MM   | 0.1303      | 3.17456      | 4.06126e-1   | 0.0264  |
| 4      | 9.859         | MF   | 0.1367      | 2114.14819   | 257.71332    | 93.7519 | 4      | 9.860         | MF   | 0.1377      | 1.15466e4    | 1397.05493   | 95.9148 |
| 5      | 10.442        | FM   | 0.1384      | 83.43619     | 10.05059     | 3.7000  | 5      | 10.442        | FM   | 0.1400      | 169.84541    | 20.22128     | 1.4109  |
| 6      | 11.170        | FM   | 0.1014      | 1.19145      | 1.95883e-1   | 0.0528  | 6      | 11.010        | MF   | 0.1326      | 7.47281      | 9.39391e-1   | 0.0621  |
| 7      | 12.098        | BB   | 0.1282      | 40.29640     | 4.88599      | 1.7869  | 7      | 11.157        | FM   | 0.1336      | 5.86704      | 7.31655e-1   | 0.0487  |
| 8      | 13.810        | MM   | 0.1217      | 2.16050      | 2.95928e-1   | 0.0958  | 8      | 12.100        | BB   | 0.1281      | 223.90973    | 27.17718     | 1.8600  |
|        |               |      |             |              |              |         | 9      | 13.807        | BB   | 0.1335      | 14.79097     | 1.70021      | 0.1229  |

Totals : 2255.04511 274.86454

Totals : 1.20383e4 1456.38492

# HPLC Compound 40

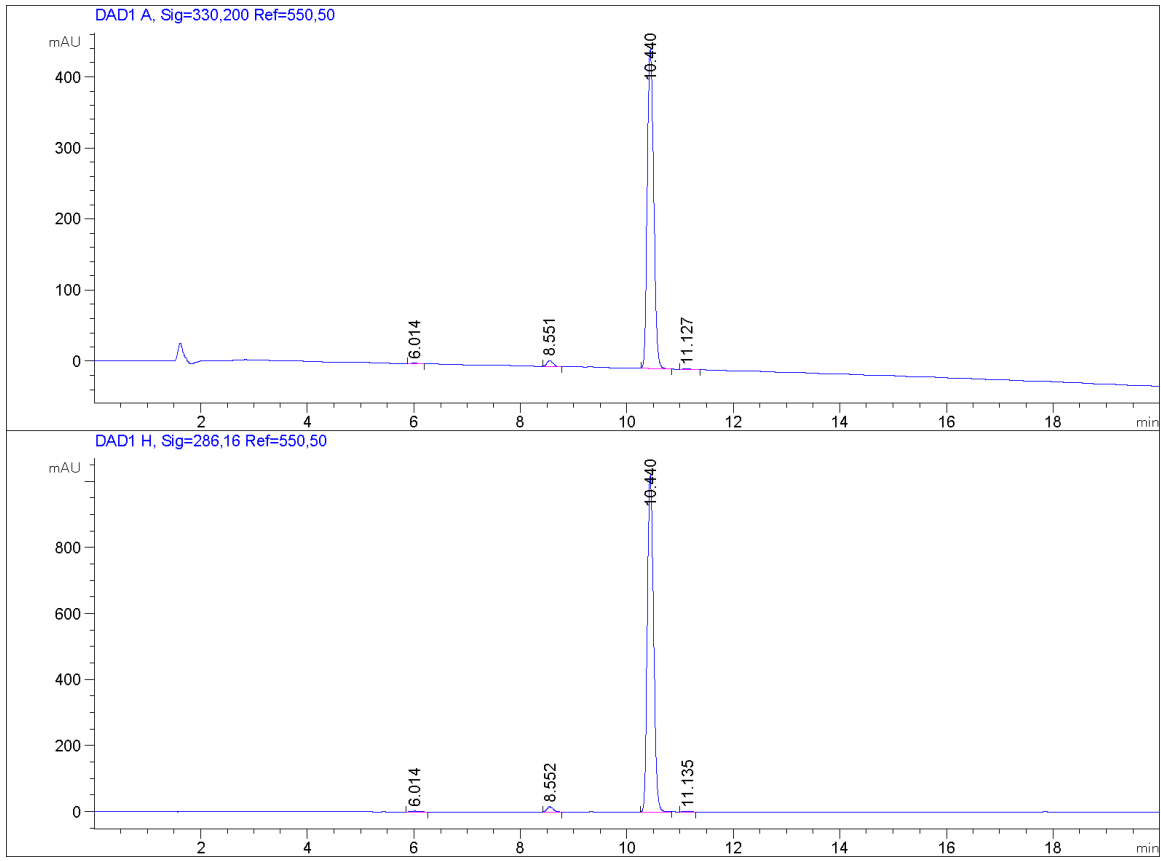

Signal 1: DAD1 A, Sig=330,200 Ref=550,50

Signal 2: DAD1 H, Sig=286,16 Ref=550,50

| Peak # | RetTime [min] | Type | Width [min] | Area [mAU*s] | Height [mAU] | Area %  | Peak # | RetTime [min] | Type | Width [min] | Area [mAU*s] | Height [mAU] | Area %  |
|--------|---------------|------|-------------|--------------|--------------|---------|--------|---------------|------|-------------|--------------|--------------|---------|
| 1      | 6.014         | MM   | 0.1306      | 6.53320      | 8.33988e-1   | 0.1726  | 1      | 6.014         | BB   | 0.1382      | 15.91976     | 1.74943      | 0.1912  |
| 2      | 8.551         | BB   | 0.1242      | 62.63586     | 7.92926      | 1.6547  | 2      | 8.552         | BB   | 0.1258      | 127.24166    | 15.83137     | 1.5283  |
| 3      | 10.440        | BB   | 0.1323      | 3706.57666   | 449.04364    | 97.9204 | 3      | 10.440        | BB   | 0.1295      | 8175.51563   | 1020.15442   | 98.1973 |
| 4      | 11.127        | BB   | 0.1450      | 9.55159      | 1.02226      | 0.2523  | 4      | 11.135        | MM   | 0.1324      | 6.92784      | 8.72410e-1   | 0.0832  |

Totals : 3785.29732 458.82915

Totals : 8325.60489 1038.60762

# HPLC Compound 44

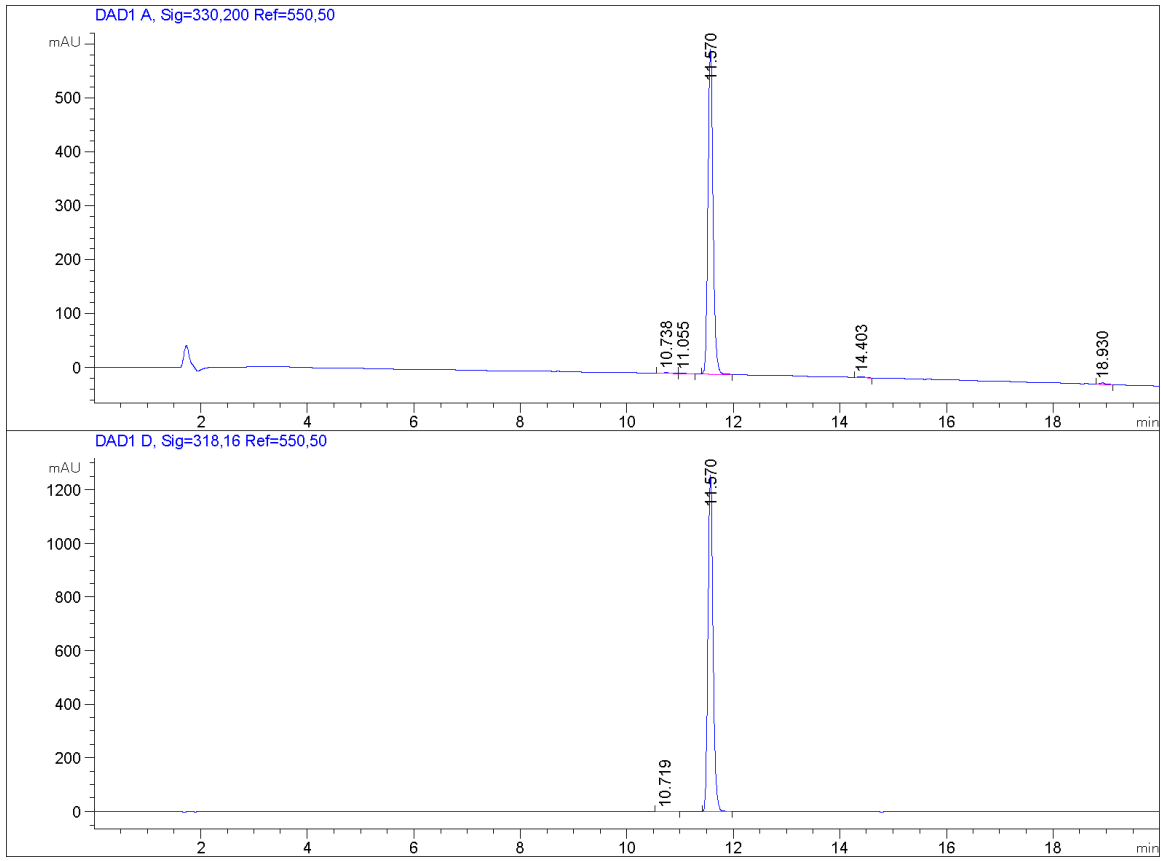

Signal 1: DAD1 A, Sig=330,200 Ref=550,50

Signal 2: DAD1 D, Sig=318,16 Ref=550,50

| Peak #   | RetTime [min] | Type | Width [min] | Area [mAU*s] | Height [mAU] | Area %  | Peak #   | RetTime [min] | Type | Width [min] | Area [mAU*s] | Height [mAU] | Area %  |
|----------|---------------|------|-------------|--------------|--------------|---------|----------|---------------|------|-------------|--------------|--------------|---------|
| 1        | 10.738        | BV   | 0.1842      | 13.73168     | 1.11107      | 0.3399  | 1        | 10.719        | BB   | 0.1509      | 16.44027     | 1.51152      | 0.1980  |
| 2        | 11.055        | VB   | 0.1324      | 10.05269     | 1.08206      | 0.2488  | 2        | 11.570        | BB   | 0.1007      | 8284.79102   | 1259.61780   | 99.8020 |
| 3        | 11.570        | BB   | 0.1009      | 3983.40625   | 604.05237    | 98.5988 | Totals : |               |      |             |              |              |         |
| 4        | 14.403        | BB   | 0.1095      | 16.17840     | 2.31659      | 0.4005  |          |               |      |             | 8301.23129   | 1261.12932   |         |
| 5        | 18.930        | BB   | 0.1063      | 16.64522     | 2.47948      | 0.4120  | Totals : |               |      |             |              |              |         |
| Totals : |               |      |             | 4040.01423   | 611.04157    |         |          |               |      |             |              |              |         |

# HPLC Compound 45

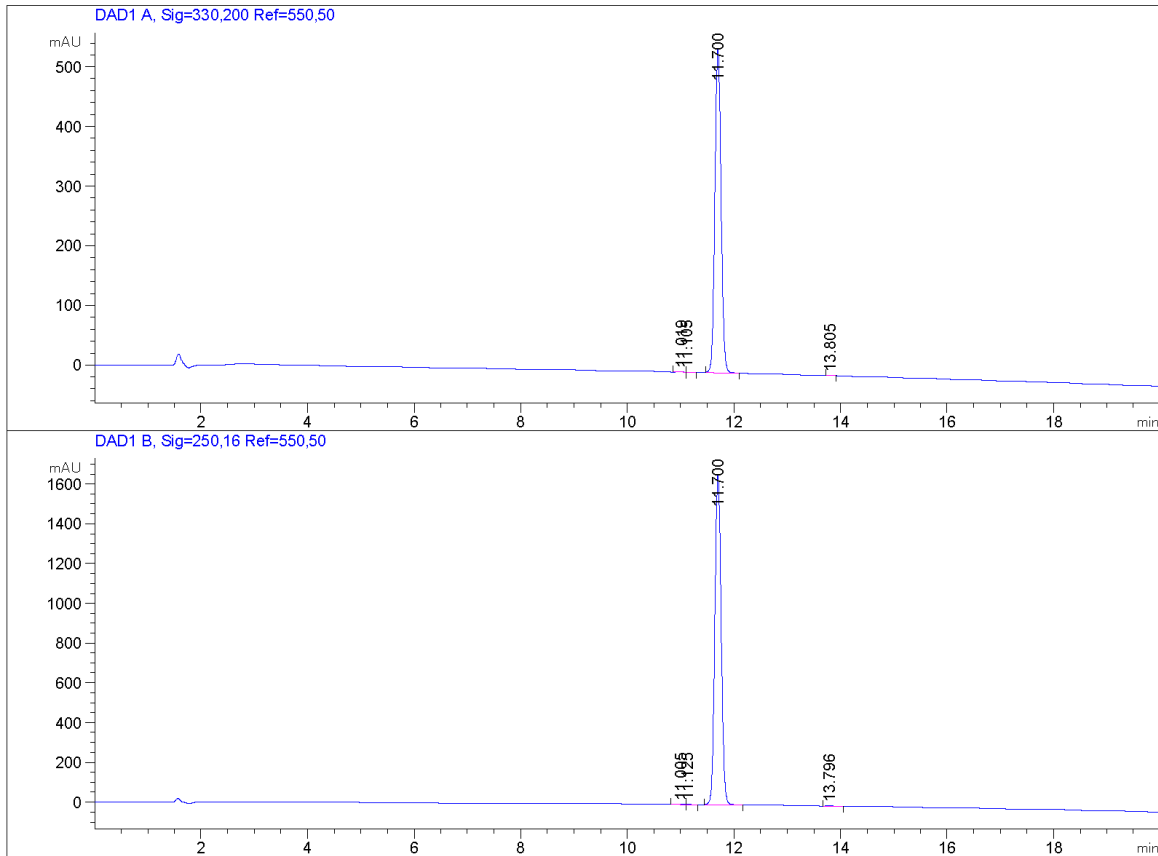

Signal 1: DAD1 A, Sig=330,200 Ref=550,50

Signal 2: DAD1 B, Sig=250,16 Ref=550,50

| Peak #   | RetTime [min] | Type | Width [min] | Area [mAU*s] | Height [mAU] | Area %  | Peak #   | RetTime [min] | Type | Width [min] | Area [mAU*s] | Height [mAU] | Area %  |
|----------|---------------|------|-------------|--------------|--------------|---------|----------|---------------|------|-------------|--------------|--------------|---------|
| 1        | 11.019        | MF   | 0.1765      | 4.36887      | 4.12618e-1   | 0.1010  | 1        | 11.005        | MF   | 0.1760      | 12.86699     | 1.21813      | 0.0947  |
| 2        | 11.105        | FM   | 0.0960      | 2.32950      | 4.04262e-1   | 0.0538  | 2        | 11.125        | FM   | 0.0962      | 5.44487      | 9.43734e-1   | 0.0401  |
| 3        | 11.700        | BB   | 0.1250      | 4319.02441   | 541.99005    | 99.8167 | 3        | 11.700        | BB   | 0.1314      | 1.35531e4    | 1657.98474   | 99.7759 |
| 4        | 13.805        | MM   | 0.1079      | 1.23456      | 1.90627e-1   | 0.0285  | 4        | 13.796        | BB   | 0.1476      | 12.12931     | 1.26824      | 0.0893  |
| Totals : |               |      |             | 4326.95734   | 542.99756    |         | Totals : |               |      |             | 1.35835e4    | 1661.41485   |         |

# HPLC Compound 46

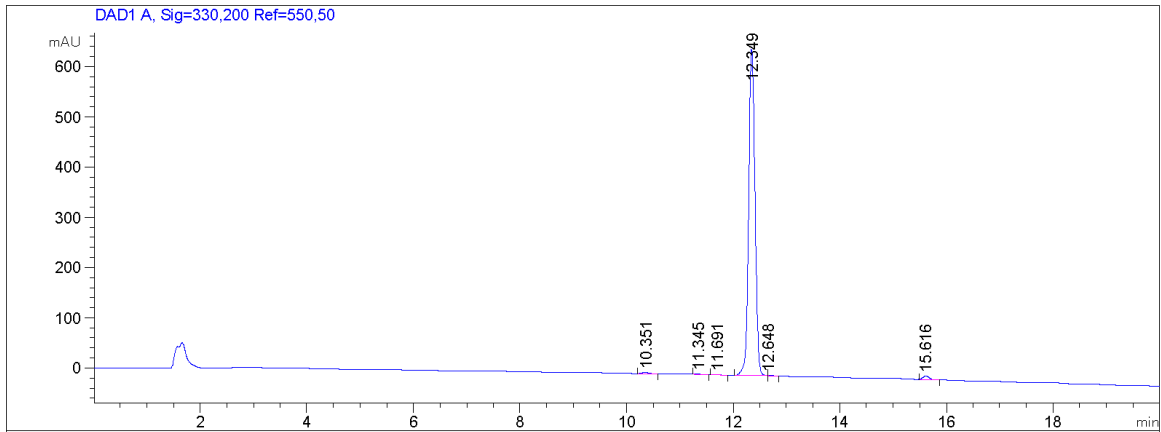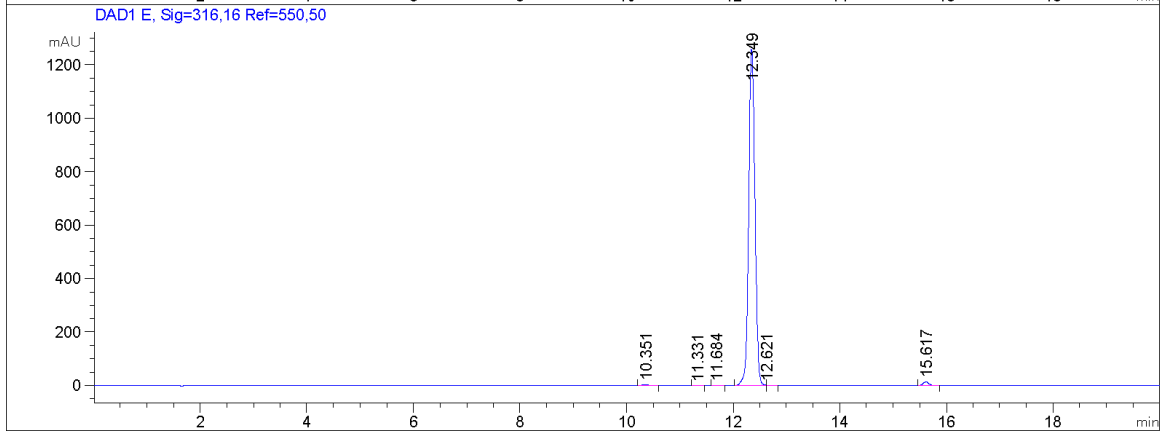

Signal 1: DAD1 A, Sig=330,200 Ref=550,50

Signal 2: DAD1 E, Sig=316,16 Ref=550,50

| Peak # | RetTime [min] | Type | Width [min] | Area [mAU*s] | Height [mAU] | Area %  | Peak # | RetTime [min] | Type | Width [min] | Area [mAU*s] | Height [mAU] | Area %  |
|--------|---------------|------|-------------|--------------|--------------|---------|--------|---------------|------|-------------|--------------|--------------|---------|
| 1      | 10.351        | BB   | 0.1358      | 16.43426     | 1.84768      | 0.3023  | 1      | 10.351        | BB   | 0.1345      | 31.43723     | 3.57756      | 0.3019  |
| 2      | 11.345        | MM   | 0.1272      | 2.36062      | 3.09312e-1   | 0.0434  | 2      | 11.331        | MM   | 0.1145      | 2.49630      | 3.63414e-1   | 0.0240  |
| 3      | 11.691        | MM   | 0.1261      | 4.27950      | 5.65829e-1   | 0.0787  | 3      | 11.684        | MM   | 0.1239      | 4.87090      | 6.55346e-1   | 0.0468  |
| 4      | 12.349        | MF   | 0.1366      | 5348.98633   | 652.49316    | 98.4046 | 4      | 12.349        | MF   | 0.1348      | 1.02498e4    | 1266.81738   | 98.4281 |
| 5      | 12.648        | FM   | 0.0740      | 4.09503      | 9.22236e-1   | 0.0753  | 5      | 12.621        | FM   | 0.1038      | 12.07526     | 1.93933      | 0.1160  |
| 6      | 15.616        | BB   | 0.1281      | 59.55434     | 7.22788      | 1.0956  | 6      | 15.617        | BB   | 0.1284      | 112.80532    | 13.65660     | 1.0833  |

Totals : 5435.71008 663.36611

Totals : 1.04134e4 1287.00964
